# Supplementary material
Source: HighWire-hosted journal article supplement (doi:10.1101/rna.053397.115)
Supplement: SuppLegends.docx [file SuppLegends.docx]

**Supplementary Tables and Figures**

**Table S1. Statistically significant (p-value ≤ 0.01) intron retention events common for *prp-6(RNAi)*, *prp-8(RNAi)* and *prp-31(RNAi)* animals.** RNA-Seq reads were mapped against a customized reference genome (using the WS220 version of the genome) including only introns, without any internal genes. Introns identified in the analysis were filtered out if (i) values of 0 FPKM in any *prp* RNAi sample, (ii) p-value was higher than 0,01, and (iii) FPKM did not follow a gradient *prp-8* >*prp-6*>*prp-31*.

Sheet 1: L3 N2 animals, Sheet 2: L3 *smg-1* mutants, Sheet 3: Adult N2, Sheet 4: 7 common intron retention events in N2 and *smg-1* mutants, Sheet 5: Information retrieved from Wormart about genes with intron retention events

**Table S2. List of genes significantly (p value ≤ 0,01)upregulated and downregulated after RNAi of *prp-6*, *prp-8* and *prp-*31 in N2 and *smg-1(r861)* L3 worms, and *glp-4(bn2)* adult animals**. Number of RNA-Seq reads per transcript was normalized and number of reads per gene was represented as FPKM (fragments per kilobase per million).

**Table S3. RNA-Seq reads corresponding to eight alternative splicing events after *gfp(RNAi)*, *prp-6(RNAi)*, *prp-8(RNAi)* and *prp-31(RNAi)*.**

**Figure S1. Conservation of s-adRP genes from yeast to human.** Phylogenetic tree of s-adRP genes and schematic representation of the corresponding protein domains that remain conserved across evolution. Tree and protein domain information retrieved from TreeFam (Schreiber et al. 2014).

**Figure S2. *prp-31(gk1094)* and *prp-8(gk3511)* heterozygous animals are happlosufficient in germ line and embryonic development.** (A) Progeny and embryonic lethality of at least 8 worms of the indicated genotypes was scored at 15ºC. Heterozygous worms for both alleles (without the balancer) show a slight reduction in the number of viable progeny. Additionally, the hT2 balancer by itself is deleterious for the survival producing fewer progeny and embryonic lethality. So the use of the alleles without the balancer is recommended for careful examination of the mutant phenotype.Bars represent the standard deviation. (B) Brood size of heterozygous *prp-31(gk1094)* worms balanced with the two genetic markers *unc-57(ad592)* and *dpy-5(e61)* compared to control worms. Progeny of 15 (dots) and 17 (squares) worms was scored at 25 °C for each genotype. Bars represent the standard deviation. (C) Distribution of genotypic proportions among the progeny of heterozygous *prp-31(gk1094); unc-57(ad592) dpy-5(e61)* animals. Proportions represent the average of the progeny of five worms counted at 25 °C. Similar Mendelian inheritance was observed at 15 °C.

**Figure S3. Intron retention in *fmo-5* mRNA**

(A) Semiquantitative RT-PCR was used to amplify the intron indicated in the box. We detected a slight accumulation of unspliced transcripts after RNAi of s-adRP genes. (B) Screen capture of the IGV genome browser at H24K24.5 gene (*fmo-5*) showing RNA-Seq reads corresponding to the *prp-6(RNAi)* sample. Grey boxes represent the 73 bp reads. Blue lines link reads mapping to two contiguous exons. The picture shows reads mapping in exon-intron borders. (C) View of the IGV genome browser at H24K24.5 gene (*fmo-5*) showing RNA-Seq reads corresponding to *gfp(RNAi)* and *prp-8(RNAi)* samples. Black regions indicate absence of reads. Both samples display similar *fmo-5* expression levels, but the *prp-8(RNAi)* sample present more reads in intronic regions.

**Figure S4: The number of seam cells decreases upon *prp-8* RNAi.**

(A). Representative images of the reporter strain that carries the transgene *wls51*[SCMp::GFP + *unc-119(+)],* which expresses GFP in hypodermal seam cells, upon control and *prp-8(RNAi)* conditions. Animals were studied under fluorescence microscopy 48 hours post L1 stage. (B). Number of GFP-positive cells in control or *prp-8(RNAi)* worms is represented in a bar graph. The statistical test applied is a t-student test and asterisks represent p-value<0.001. Error bars represent standard deviation. The data is obtained from three different biological replicates. For in each independent experiment 30 worms were scored.

**Figure S5. Larval arrest and *egl-1*::GFP ectopic expression is observed after hydroxyurea treatment**. Panels show Nomarski and fluorescence microscopy images of synchronized animals that were grown at 20°C either in NGM plates containing 25mM of hydroxyurea or normal NGM plates. Pictures were taken 24 and 48 hours post L1. Scale bar represents 100µm in all cases.
