# Supplementary material
Source: HighWire-hosted journal article supplement (doi:10.1101/rna.053397.115)
Supplement: Table_S1.xlsx [file Table_S1.xlsx]

## Sheet: 69 introns up filtered N2
intron ID	Chr	Start	End	Intron Size (bp)	P-value (intron differential expression)	GFPRNAi L3 FPKM	prp8RNAi L3 FPKM	prp6RNAi L3 FPKM	prp31RNAi L3 FPKM
F43H9.4 (2)	V	8028154	8028268	114	5e-05	0	79.3329	44.6471	33.0592
Y38E10A.10 (3)	II	12610856	12611001	145	0.00155	0	19.8978	11.9177	8.76348
W03D2.6 (4)	IV	4057741	4057913	172	0.00155	0	6.34078	3.57628	0.868922
Y55F3AM.3 (2)	IV	1013141	1013331	190	5e-05	0.948968	9.94339	5.56423	1.73407
T21E8.1 (11)	X	10875007	10875204	197	0.00155	0	5.05855	1.39529	1.01434
R10E11.5 (1)	III	9786255	9786454	199	5e-05	0	2.08976	1.34724	0.979359
C17H11.6 (5)	X	8189916	8190117	201	5e-05	0	2.01632	1.30206	0.94647
C46F4.2 (2)	X	5939470	5939671	201	5e-05	0	5.37687	1.95308	0.473235
C34D10.2 (4)	X	8020934	8021141	207	5e-05	1.41425	10.9248	1.77209	0.429328
F44G4.8 (3)	II	9007432	9007640	208	0.00155	0	2.38856	1.74481	0.845423
C27A12.8 (5)	I	6060679	6060888	209	0.00155	0	2.9381	1.14551	0.832551
T02E1.5 (1)	I	8212842	8213054	212	5e-05	0	1.68187	1.64284	1.59196
T28D9.10 (2)	II	6489429	6489642	213	5e-05	0	3.31265	1.61902	1.56886
C30H6.12 (2)	IV	17385462	17385680	218	5e-05	0	3.58948	2.01157	0.365474
C23H3.1 (1)	II	70281	70505	224	0.00155	0	2.83063	0.928782	0.675011
R13A5.5 (1)	III	7557301	7557526	225	0.00155	0	2.32754	1.83398	0.333223
M01G12.9	I	12109719	12109946	227	0.00155	0	2.72052	0.89421	0.649907
K08D10.12 (1)	IV	4179003	4179255	252	0.00155	0	2.03936	1.01775	0.246726
W09B6.1 (4)	II	1147574	1147827	253	0.00155	0	2.35513	0.335947	0.488666
F20A1.7 (1)	V	7028909	7029165	256	0.00155	0	1.95893	0.979181	0.237411
Y48C3A.18	II	13412667	13412931	264	0.00155	0	1.51222	0.909821	0.441302
F35B3.7	X	17035345	17035611	266	5e-05	0	1.78166	1.19189	0.650425
K01G5.2 (4)	III	10755096	10755369	273	5e-05	0.676047	5.30267	2.24592	1.43017
F08F8.2 (3)	III	7360345	7360624	279	5e-05	0	1.59198	0.802253	0.389303
Y75B7AR.1	V	1391279	1391562	283	5e-05	0	1.54111	0.777574	0.754752
ZK593.5 (8)	IV	10931931	10932215	284	0.00155	0	2.0385	0.514421	0.187252
C02F5.8 (3)	III	8238973	8239266	293	5e-05	0	1.66431	1.20306	0.525661
R119.4 (6)	I	381474	381793	319	5e-05	0	2.38697	0.607727	0.29526
ZK54.2	X	17467614	17467943	329	5e-05	0	1.30951	0.190904	0.695793
T06H11.4 (4)	X	10137898	10138229	331	5e-05	0	1.1092	0.754905	0.412733
F25D7.3	I	10409528	10409860	332	5e-05	0	1.47027	0.938277	0.273601
C36E6.1	X	17434506	17434843	337	5e-05	0	2.49963	1.27733	0.13304
C42C1.4 (1)	IV	12271023	12271361	338	5e-05	0	1.06519	0.725893	0.661562
Y37B11A.3 (4)	III	5784487	5784829	342	5e-05	0.214456	2.43027	2.48598	1.16531
F42G2.4 (3)	II	2411978	2412326	348	5e-05	0	1.6799	0.344034	0.25089
F11A1.3 (7)	X	10662828	10663186	358	5e-05	0.197542	1.59405	1.47138	0.357742
W02A11.4 (2)	I	12742040	12742403	363	5e-05	0	2.48685	1.27622	0.465482
C05E4.9 (1)	V	726981	727385	404	0.0035	3.70187	56.1015	13.1727	4.85617
F33D4.2 (20)	IV	7692953	7693369	416	5e-05	0	1.59686	0.761314	0.463168
Y71G12B.17	I	1667742	1668165	423	5e-05	0	0.836629	0.741251	0.270601
F49D11.1 (1)	I	10939082	10939506	424	5e-05	0	1.19059	0.615392	0.449315
C14F5.1 (1)	X	7954961	7955391	430	5e-05	0	0.814624	0.601844	0.351565
ZC132.4 (1)	V	4302648	4303084	436	5e-05	0	1.93475	1.29553	0.258012
K09E4.2 (4)	II	14130675	14131126	451	5e-05	0	2.58864	1.0058	0.244864
C33H5.11 (3)	IV	7787262	7787728	466	5e-05	0	1.3325	0.744235	0.621303
C01B10.11 (2)	IV	6659094	6659562	468	5e-05	0	1.32373	0.739438	0.462983
C50F2.3 (5)	I	3879552	3880021	469	5e-05	0	2.02982	0.631769	0.153833
D2096.7 (3)	IV	8376823	8377297	474	5e-05	0	2.39647	0.829042	0.378522
H15N14.1 (1)	I	7773508	7774007	499	5e-05	0	1.20113	0.480192	0.140347
H24K24.5 (3)	V	901868	902374	506	0.00325	1.71004	16.3807	6.39932	3.23203
C26E6.5 (3)	III	4938378	4938915	537	5e-05	0	1.16159	0.518477	0.063158
F33H12.5 (2)	II	2584858	2585445	587	5e-05	0	3.29174	0.610738	0.055813
W09B6.1 (3)	II	1145066	1145661	595	5e-05	0	4.37919	1.57384	0.383555
F44G3.2 (1)	V	16104890	16105525	635	0.00545	0.416218	5.25471	2.05977	1.20496
F49D11.9	I	10934233	10934893	660	5e-05	0	0.87315	0.652384	0.381682
C10H11.3	I	4731771	4732452	681	5e-05	0	1.01712	0.876647	0.091594
F47B10.9 (4)	X	10913151	10913852	701	5e-05	0	0.806379	0.482479	0.220562
C25A1.4 (3)	I	10171115	10171829	714	0.00535	0.92858	5.90466	4.06402	1.46479
H24K24.5 (5)	V	902760	903486	726	0.0052	0.279685	7.31926	1.96022	0.590417
Y39B6A.35	V	18998851	18999612	761	5e-05	0.065865	1.76121	0.48874	0.238359
R11A8.7 (11)	IV	10380647	10381425	778	5e-05	0	0.654726	0.580956	0.115913
Y52B11A.9 (1)	I	11035833	11036637	804	5e-05	0	0.917969	0.304121	0.259583
Y48G10A.4 (4)	I	13465369	13466260	891	5e-05	0	1.40329	0.759332	0.163417
C44C8.6 (1)	IV	885422	886441	1019	0.0043	0.276804	3.18119	1.55892	0.306086
Y65B4A.1 (1)	I	655063	656562	1499	5e-05	0	0.856248	0.341703	0.107207
T01G1.3 (9)	IV	11368502	11370260	1758	0.0071	0.173805	1.53095	0.981848	0.449279
F08B1.1	II	5331655	5334510	2855	0.0043	0.132578	1.27384	0.703742	0.142162
R03H10.2	II	4155943	4160178	4235	0.0091	0.029235	1.09222	0.144468	0.088167
F43G6.4	II	11790941	11795447	4506	0.0053	0.091377	1.13781	0.285976	0.104718

## Sheet: 81 introns up smg-1 filtered
Intron ID	Chr	Start	End	Intron Size (bp)	P-value (intron differential expression)	smg1-gfpRNAi-L3 FPKM	smg1-prp8RNAi-L3 FPKM	smg1-prp6RNAi-L3 FPKM	smg1-prp31RNAi-L3 FPKM
F44G3.2	V	16103945	16104103	158	5e-05	0	16.5679	10.2879	5.98279
F58H10.1 (1)	I	7756086	7756245	159	5e-05	0	16.0126	8.54484	2.89533
T26C5.3 (2)	II	9243295	9243457	162	0.0008	0	4.83827	3.90161	2.63495
C34G6.6 (3)	I	5876908	5877076	168	5e-05	0	23.2305	3.30122	1.10794
M04C3.1 (2)	V	19438602	19438772	170	5e-05	1.00827	10.5075	8.35821	3.15042
F08C6.1 (9)	X	7591292	7591472	180	0.0008	0	2.2284	1.65254	1.64898
Y37B11A.3 (1)	III	5783002	5783183	181	0.00035	16.7968	232.312	113.222	41.9371
F09E5.8 (4)	II	5351393	5351575	182	0.00155	0	3.54891	1.58366	1.57829
F10D7.5 (7)	X	17386016	17386199	183	0.00155	0	2.77678	2.32661	0.772442
F37B1.1	II	13610901	13611085	184	5e-05	0	12.9043	8.35797	0.756334
ZC395.10	III	5273573	5273760	187	0.00155	0	2.54912	1.43163	1.42265
F09B9.1 (2)	X	10140503	10140716	213	0.00715	2.11256	50.2476	10.2757	6.43222
C30H6.12 (2)	IV	17385462	17385680	218	5e-05	0	4.52818	1.30956	0.857612
F46H6.2 (2)	X	4495775	4495994	219	5e-05	0	2.23312	2.1542	0.423122
F46G10.1 (1)	X	13311062	13311283	221	0.00155	0.754135	2.17343	1.25965	0.412164
ZC504.4 (8)	X	10425339	10425582	243	5e-05	0	3.06232	0.653031	0.319315
B0416.6 (3)	X	9295031	9295277	246	0.00155	0	1.34853	0.950191	0.619275
C01B12.2 (3)	II	21441	21687	246	0.00155	0	1.34853	1.26692	0.309638
Y65B4BL.1	I	530723	530973	250	5e-05	0	11.3909	4.56768	0.892708
K08E7.7 (4)	IV	12588385	12588647	262	0.00155	0	2.07763	0.545375	0.266205
F44E7.4 (1)	V	5774266	5774534	268	5e-05	0	1.75114	0.518088	0.505566
W05G11.2	III	57772	58040	268	0.00065	1.35766	58.663	24.8682	5.30844
T18D3.3 (3)	X	12465708	12465977	269	5e-05	0	3.90624	0.770689	0.501342
C03B1.13	X	6335405	6335678	273	5e-05	0	1.04899	0.994545	0.970208
F40F8.10	II	11125569	11125843	274	0.00155	0	1.04032	0.739951	0.481203
Y59H11AR.6 (1)	IV	8598080	8598355	275	0.00155	0	1.0318	0.97878	0.238681
M60.5 (5)	X	8244726	8245011	285	5e-05	0.196757	1.33472	0.453332	0.662967
C09G4.1 (6)	IV	8543660	8543949	289	5e-05	0	1.29519	0.880617	0.214607
C07A9.7	III	9691282	9691579	297	5e-05	0	2.79442	1.87345	0.608588
C33F10.7 (3)	II	4820337	4820639	302	5e-05	0	1.18105	0.603869	0.980699
F20D12.2 (6)	IV	7952304	7952615	311	5e-05	0	1.43084	0.759905	0.185079
M01G12.9 (3)	I	12111988	12112299	311	5e-05	0	2.06677	0.949881	0.185079
F10G8.8 (7)	I	10054095	10054407	312	5e-05	0	1.42171	1.32157	0.183925
R03D7.2	II	10933085	10933410	325	5e-05	0.150015	1.75012	1.57191	0.510353
F49C12.11	IV	9319447	9319773	326	5e-05	0	1.0149	0.694618	0.338279
F21D5.2	IV	8728271	8728603	332	5e-05	0	2.10063	1.51085	0.490487
M03F8.3 (1)	V	5941233	5941568	335	5e-05	0	1.10154	0.990726	0.160811
C08F11.5 (1)	IV	13634544	13634917	373	5e-05	0.116437	1.36194	0.819966	0.399185
F28B12.2 (7)	II	5939698	5940075	377	5e-05	0	1.78286	0.805324	0.784099
F54C9.11 (2)	II	8584545	8584928	383	5e-05	0	1.08466	0.392153	0.254539
T02C12.1 (11)	III	4033363	4033746	383	5e-05	0	1.62698	0.784307	0.127269
F36A4.7 (9)	IV	4255651	4256052	401	5e-05	0	1.70761	0.727324	0.118015
C05E4.9 (1)	V	726981	727385	404	0.0012	4.27013	50.1083	17.0073	7.46249
F49A5.3	V	16858603	16859020	417	5e-05	0.193058	0.5655	0.455449	0.443382
W02A11.3 (1)	I	12738530	12738953	423	5e-05	0	1.566	0.445308	0.433503
B0416.6	X	9294150	9294583	433	5e-05	0	1.15401	0.322028	0.208989
R53.3 (4)	II	9959807	9960241	434	5e-05	0	1.41518	0.74872	0.728852
C28A5.3 (2)	III	4442541	4442976	435	5e-05	0	1.49821	0.426319	0.103751
ZC132.4 (1)	V	4302648	4303084	436	5e-05	0	4.39065	1.59304	0.516919
F14B6.6 (3)	I	12234140	12234578	438	5e-05	0	0.784674	0.527277	0.307968
T26G10.1	III	9404782	9405241	459	5e-05	0	1.29768	0.98202	0.382365
T04C9.6 (3)	III	5978323	5978818	495	5e-05	0	0.941723	0.702728	0.256502
T06F4.1	X	4057634	4058144	510	5e-05	0	0.416114	0.252424	0.655179
W05B2.7 (2)	III	10988721	10989248	527	5e-05	0	0.99234	0.321229	0.234492
F41E6.4 (6)	V	8614182	8614712	530	5e-05	0	1.70618	0.637332	0.46524
Y43F8B.7	V	19490308	19490913	605	5e-05	0	0.9829	0.398497	0.129278
F44G3.2 (1)	V	16104890	16105525	635	0.00125	0.574051	6.49841	2.73996	2.24235
Y44A6C.1	V	20713944	20714585	641	0.0062	0.566876	5.20484	1.96813	1.31685
F32B6.3 (1)	IV	9882503	9883149	646	5e-05	0	1.00028	0.608788	0.118496
T23E1.2 (4)	IV	3144839	3145491	652	5e-05	0.151139	2.3962	0.661593	0.234133
C29F3.7 (5)	V	15356616	15357304	688	0.0067	0.516315	3.59171	2.29959	1.25541
F11A1.3 (6)	X	10662039	10662731	692	5e-05	0	0.776939	0.445362	0.216708
H24K24.5 (5)	V	902760	903486	726	0.00075	0.306457	6.65944	3.08915	0.917148
ZK770.3 (3)	I	3758110	3758866	756	5e-05	0	1.10178	0.547217	0.09682
K08E7.7 (5)	IV	12589425	12590306	881	5e-05	0	0.911128	0.782559	0.320616
Y51A2D.7 (5)	V	18537911	18538826	915	5e-05	0	1.3536	0.354113	0.076569
K09E4.2 (6)	II	14131697	14132618	921	0.00225	0.292861	3.74107	1.24921	1.06357
B0563.4	X	9150690	9151616	926	5e-05	0	0.857698	0.504203	0.150953
F53H1.1 (4)	IV	1302095	1303063	968	0.0084	0.153219	2.3191	1.28738	0.572626
C44C8.6 (1)	IV	885422	886441	1019	0.0037	0.345856	3.39994	1.90368	0.505155
Y46G5A.17 (3)	II	12794067	12795113	1046	0.009	0.125737	5.10957	1.15796	0.29391
Y66D12A.10 (3)	III	11566533	11567647	1114	0.0054	0.467043	4.46522	1.59045	0.940586
Y54F10AR.1	III	2573379	2574497	1118	5e-05	0	0.660638	0.403725	0.151077
F39C12.3 (6)	X	4869553	4870866	1313	0.0095	0.214628	2.17505	0.800678	0.276409
F15B9.8 (1)	V	12988759	12990161	1402	0.00945	0.338691	3.52898	1.1753	0.14001
C41C4.6 (2)	II	8130602	8132237	1635	0.0005	0.268363	4.02876	1.37433	0.648835
T12F5.4 (6)	I	3719168	3721006	1838	0.00815	0.088451	1.52412	0.391019	0.138323
Y80D3A.2 (8)	V	18879497	18881521	2024	0.0024	0.092887	1.43749	0.448147	0.280256
H06O01.1 (6)	I	7018016	7020555	2539	0.00715	0.124743	1.26986	0.301162	0.268545
F08B1.1	II	5331655	5334510	2855	0.00255	0.055054	1.28377	0.742363	0.150893
F56D3.1	II	4142872	4146341	3469	0.009	0.029889	1.9735	0.649979	0.061469

## Sheet: 17 introns up adult glp-1
Intron ID	Chr	Start	End	Intron Size (bp)	control FPKM	prp8-31 FPKM	P-value (Transcript differential expression)	glp4-gfpRNAi FPKM	glp4-prp8RNAi FPKM	glp4-prp31RNAi FPKM
Y6G8.9	V	17600139	17600310	171	567.868	4357.73	0.00255	9.06168	12.9299	10.9876
Y105E8A.4 (1)	I	14368848	14369518	670	538.206	1748.49	0.0011	1.07354	4.86496	1.30312
C48A7.2 (5)	IV	7395342	7395514	172	0	1722.81	0.0012	0	4.20038	2.14359
ZK550.6 (3)	IV	17262100	17262292	192	0	1057.25	0.00045	0	2.70837	2.10735
F08H9.3	V	14462344	14462624	280	0	728.856	5e-05	0	1.88055	0.756832
F39E9.1 (1)	II	3318545	3318822	277	0	565.265	0.00025	0.252793	1.68529	0.258223
C42D8.3 (5)	X	5090720	5091011	291	0	556.547	0.00025	0	1.51378	0.46514
T11F9.1 (6)	V	11461515	11461728	213	0	540.675	0.0087	0	1.43556	0.502668
Y48G9A.10 (2)	III	2084756	2085840	1084	280.961	663.985	0.0095	0.560425	1.40577	1.13498
F55H12.3 (14)	I	8883538	8883826	288	0	484.549	0.00025	0	1.32654	0.712928
K08D8.7 (2)	IV	12897963	12898264	301	0	503.075	0.00025	0	1.20908	0.651255
F19C6.2 (6)	X	10003816	10004093	277	0	473.251	0.0012	0	1.20378	0.516446
F54C1.3 (8)	I	4999848	5000237	389	0	484.999	5e-05	0	1.12855	0.681595
Y53G8B.2 (1)	III	3103375	3103634	259	0	467.041	0.0012	0	1.12508	0.600829
F55B12.3 (8)	V	13821702	13822008	306	0	383.472	0.0012	0	0.974264	0.420141
W03F8.2	IV	5190106	5190393	287	0	370.484	0.0012	0	0.890997	0.478763
F28C10.3 (1)	X	532791	533701	910	20.3532	245.551	0.0009	0.040598	0.692678	0.16929

## Sheet: 7 common intron retentions 
7 common intron retention events in N2 and NMD mutants
C05E4.9 (1)
H24K24.5 (5)
F44G3.2 (1)
C30H6.12 (2)
C44C8.6 (1)
ZC132.4 (1)
F08B1.1

## Sheet: 67 genes  with intron  ret.
Sequence Name (Gene)	Gene Public Name	Gene Description (Concise)	Transcript Type	Chr Name	Start (bp)	End (bp)	Operon
R119.4	pqn-59	pqn-59 encodes a protein containing a glutamine/asparagine (Q/N)-rich domain and similarity to the vertebrate ubiquitin-associated proteins UBAP2 and UBAP2L; microarray experiments indicate that pqn-59 is expressed maternally and embryonically and in situ hybridization studies show that pqn-59 mRNA exhibits strong germline expression; loss of pqn-59 activity via RNAi in a wild-type background res…	coding	I	377478	381907	CEOP1004
Y65B4A.1	Y65B4A.1		coding	I	654099	658709	CEOP1977
Y71G12B.17	Y71G12B.17		coding	I	1667503	1669776
C50F2.3	C50F2.3		coding	I	3877064	3880758	CEOP1128
C10H11.3	ugt-25		coding	I	4731605	4735280
C27A12.8	ari-1		coding	I	6058451	6061035	CEOP1296
H15N14.1	adr-1	adr-1 encodes, through alternative splicing, at least five isoforms of an adenosine deaminase that acts on RNA (ADAR); ADARs are RNA-editing enzymes that deaminate adenosines to create inosines in double-stranded RNA (dsRNA); adr-1 is expressed in embryos, most or all neurons (e.g., sensory neurons and cilia, the ventral nerve cord, motor neurons and interneurons) and in the developing (but not t…	coding	I	7773411	7777572
T02E1.5	dhs-3	dhs-3 encodes a member of the short-chain dehydrogenases/reductases family (SDR) predicted to be mitochondrial.	coding	I	8212356	8218355
C25A1.4	C25A1.4		coding	I	10169626	10173205
F25D7.3	blmp-1	blmp-1 encodes a zinc finger and SET domain-containing protein that is the C. elegans BLIMP1 (B lymphocyte-induced maturation protein 1) ortholog; loss of blmp-1 activity via deletion mutation has been reported to result in small, dumpy animals with abnormal fat content, while loss of blmp-1 activity via RNAi reportedly results in animals that are small, dumpy, and uncoordinated with patchy color…	coding	I	10409350	10413837
F49D11.9	tag-296		coding	I	10933806	10935705	CEOP1958
F49D11.1	prp-17		coding	I	10936814	10940539	CEOP1650
Y52B11A.9	Y52B11A.9		coding	I	11034043	11038820
M01G12.9	M01G12.9		coding	I	12109052	12112504
W02A11.4	uba-2	uba-2 encodes the C. elegans ortholog of Saccharomyces cerevisiae Uba2p and human ubiquitin-like 2 activating enzyme E1B; by homology, UBA-2 is predicted to form, with a regulatory subunit, AOS-1, a heterodimeric enzyme that activates the ubiquitin-like protein SMO-1/SUMO in preparation for its covalent attachment to target proteins to regulate their subcellular localization and/or stability; in …	coding	I	12741595	12748719
Y48G10A.4	Y48G10A.4		coding	I	13455347	13470340	CEOP1996
C23H3.1	egl-26	egl-26 encodes a protein that contains an H-box and an NC domain that is a member of the LRAT (lecithin retinol acyltransferase) subfamily of the NlpC/P60 superfamily of enzymes; egl-26 activity is required for fertility, egg laying, and vulval development, specifically the connection of the uterus to the vulva mediated by proper morphogenesis of vulF, the most dorsal vulval cell; EGL-26 is an ap…	coding	II	69660	71279
W09B6.1	pod-2	pod-2 encodes an acetyl-CoA carboxylase; by sequence similarity, POD-2 is predicted to catalyze the first step in de novo fatty acid biosynthesis; pod-2 is required for proper embryonic polarity and for osmotic protection of the eggshell; pod-2 activity is also required for molting.	coding	II	1136837	1152712
F42G2.4	fbxa-182	This gene encodes a protein containing an F-box, a motif predicted to mediate protein-protein interactions either with homologs of yeast Skp-1p or with other proteins; this gene's encoded protein also contains an FTH/DUF38 motif, which may also mediate protein-protein interaction.	coding	II	2410778	2412746
F33H12.5	sri-36		coding	II	2583787	2585598
R03H10.2	R03H10.2		coding	II	4155775	4167370
F08B1.1	vhp-1	vhp-1 encodes a MAP kinase phosphatase (MKP); VHP-1 activity is required for regulation of the KGB-1/JNK-like MAPK-mediated stress response pathway.	coding	II	5322990	5340810
T28D9.10	snr-3	snr-3 encodes an ortholog of human small nuclear ribonucleoprotein Sm D1, a protein that forms part of a heptameric complex required for biogenesis and function of the snRNPs that catalyze mRNA splicing; in combination with the gene that encodes the human Sm D2 ortholog (snr-4), snr-3 affects embryonic viability and nuclear association and localization of P granules in embryos, based on an RNAi a…	coding	II	6488727	6489735
F44G4.8	dep-1	dep-1 encodes a class III receptor protein tyrosine phosphatase (R-PTP) orthologous to human R-PTPs such as PTPRJ/Dep-1 (mutated in epithelial cancers; OMIM:600925); DEP-1 is required, redundantly with LIP-1 and LET-60, and downstream of LIN-12, to promote secondary over primary vulval fate in the P5.p and P7.p lineages; DEP-1 is expressed in P5.p and P7.p lineages, and dep-1 acts cell-autonomous…	coding	II	9005734	9019705
F43G6.4	F43G6.4		coding	II	11790696	11797251
Y38E10A.10	lips-16		coding	II	12610247	12612291
Y48C3A.18	Y48C3A.18		coding	II	13412563	13414834	CEOP2606
K09E4.2	K09E4.2		coding	II	14127605	14132760	CEOP2628
C26E6.5	fsn-1	This gene encodes a protein containing an F-box, a motif predicted to mediate protein-protein interactions either with homologs of yeast Skp-1p or with other proteins	coding	III	4937283	4939470	CEOP3244
Y37B11A.3	Y37B11A.3		coding	III	5782691	5785089
F08F8.2	F08F8.2		coding	III	7359433	7362066
R13A5.5	ceh-13	a homolog of Hox genes of labial/Hox1 type; affects viability, body shape and anterior patterning during embryogenesis, interacts genetically with hox genes; and is expressed in A, D, E and MS lineages in the early embryo, and in the anterior dorsal hypodermal cells, anterior body wall muscle cells, and in the cells of the prospective ventral nerve cord at the comma stage; and in the ventral nerv…	coding	III	7555594	7558142
C02F5.8	tsp-1		coding	III	8237924	8239352
R10E11.5	R10E11.5		coding	III	9785882	9789555
K01G5.2	hpl-2	hpl-2 encodes one of two C. elegans heterochromatin protein 1 (HP1) homologs; hpl-2 activity is required for silencing of transgenes in the germline, germline development, and vulval cell fate specification; in addition, hpl-2 negatively regulates RNA-mediated interference (RNAi); hpl-2 also functions redundantly with hpl-1 in larval, somatic gonad and germline development, and redundantly with h…	coding	III	10752164	10755424	CEOP3701
C44C8.6	mak-2	mak-2 encodes a serine/threonine protein kinase that is orthologous to the vertebrate MAPKAPK2 and MAPKAPK3 (MAP kinase-activated protein kinase family members 2 and 3) kinases.	coding	IV	884909	890187
Y55F3AM.3	Y55F3AM.3		coding	IV	1012652	1019687
W03D2.6	W03D2.6		coding	IV	4056513	4058295
K08D10.12	K08D10.12	K08D10.12 encodes a putative tRNA 3'-site splicing endonuclease subunit, orthologous to human TSEN34 and budding yeast SEN34; K08D10.12 is coexpressed (as is DNJ-15) with the paralogous small nuclear ribonucleoprotein (snRNP)-associated proteins RNP-2/U1A and RNP-3/U2B	coding	IV	4178454	4179527	CEOP4116
C01B10.11	C01B10.11	C01B10.11 encodes a novel protein, conserved amongst nematodes; loss of C01B10.11 function via large-scale RNAi experiments indicates that C01B10.11 is required for coordinated locomotion and normal body morphology; expression studies indicate that C01B10.11 mRNA is enriched in the intestine.	coding	IV	6657968	6660425
F33D4.2	itr-1	itr-1 encodes a putative inositol (1,4,5) trisphosphate receptor that affects the defecation cycle and pharyngeal pumping, and also affects ovulation in a pathway downstream of LET-23; interacts with UNC-54 in vivo, and is expressed in the adult intestine, pharynx, excretory cell, germ line, and spermatheca, with limited neuronal expression.	coding	IV	7675163	7696912
C33H5.11	imp-3		coding	IV	7785962	7789496	CEOP4252
D2096.7	D2096.7		coding	IV	8375720	8377617	CEOP4288
R11A8.7	R11A8.7	The protein product of this gene is predicted to contain a glutamine/asparagine (Q/N)-rich ('prion') domain, by the algorithm of Michelitsch and Weissman (as of the WS77 release of WormBase, i.e., in wormpep77).	coding	IV	10374884	10387275	CEOP4376
ZK593.5	dnc-1	DNC-1 encodes a dynactin, orthologous to Drosophila GLUED, that is required for pronuclear migration and centrosome separation in one-cell embryos and for the correct alignment of mitotic spindles in early embryos; DNC-1 shares embryonic functions with DNC-2, DHC-1, LIS-1 and NUD-1; DNC-1 is located at cortical microtubule attachment sites.	coding	IV	10926253	10933139
T01G1.3	sec-31		coding	IV	11365596	11371772
C42C1.4	C42C1.4		coding	IV	12270467	12275977	CEOP4612
C30H6.12	C30H6.12		coding	IV	17383399	17386746
C05E4.9	gei-7	gei-7 encodes a predicted isocitrate lyase/malate synthase, an enzyme known to function in the glyoxylate cycle; GEI-7 was identified in a screen for proteins that interact with GEX-3, a homolog of human HEM-2 which is required for embryonic development; GEI-7 is required for embryonic morphogenesis and appears to act downstream of DAF-16 to influence lifespan.	coding	V	724208	728104
H24K24.5	fmo-5	fmo-5 encodes a flavin-containing monoxygenase homologous to human FMO1, FMO2, and FMO3 (OMIM:602079, mutated in trimethylaminuria).	coding	V	899313	903580
Y75B7AR.1	Y75B7AR.1		coding	V	1391163	1392056
ZC132.4	ZC132.4		coding	V	4301279	4304380
F20A1.7	twk-11	twk-11 encodes one of more than 40 TWK (two-P domain K+) potassium channels in C. elegans that contain two pore regions and four transmembrane domains; orthologous to C. briggsae CBG19123 with some similarity to Drosophila CG6004.	coding	V	7028311	7036424
F43H9.4	F43H9.4		coding	V	8026671	8028774	CEOP5176
F44G3.2	F44G3.2		coding	V	16103874	16106120
Y39B6A.35	tgt-2		coding	V	18998314	19000922	CEOP5480
C46F4.2	acs-17		coding	X	5937530	5942160
C14F5.1	dct-1	dct-1 encodes a protein with similarity to the mammalian BNIP3 proteins that interact with Bcl-2 and the Adenovirus E1B 19kDa protein and that have been shown to have pro-apoptotic activity; loss of dct-1 activity via RNAi in daf-2 mutants and in gld-1; daf-2 doubly mutant animals indicates that dct-1 can function to regulate both lifespan and tumor cell proliferation; when expressed in mammalian…	coding	X	7954307	7956143
C34D10.2	C34D10.2		coding	X	8017972	8027255
C17H11.6	C17H11.6		coding	X	8185130	8203734
T06H11.4	moc-1	moc-1 encodes an ortholog of human GEPHYRIN (GPHN; OMIM:603930), which when mutated leads to molybdenum cofactor (MoCo) deficiency; MOC-1 is also paralogous to LIN-46.	coding	X	10136068	10138560
F11A1.3	daf-12	daf-12 encodes a member of the steroid hormone receptor superfamily that is homologous to human VITAMIN D RECEPTOR (VDR; OMIM:601769, mutated in vitamin D-resistant rickets); daf-12 affects dauer formation downstream of the TGF- and insulin signaling pathways, and affects gonad-dependent adult longevity together with DAF-16, chemosensory signal transduction, and distal tip cell migration and hypo…	coding	X	10644344	10666815
T21E8.1	pgp-6	pgp-6 encodes an ATP-binding protein that is a member of the P-glycoprotein subclass of the ATP-binding cassette (ABC) transporter superfamily; PGP-6 is predicted to function as a transmembrane protein that couples energy to transport of various molecules across membranes, but as loss of pgp-6 activity via RNAi results in no obvious defects, the precise role of PGP-6 in C. elegans development and…	coding	X	10871149	10876236
F47B10.9	F47B10.9		coding	X	10912089	10914010
F35B3.7	F35B3.7		coding	X	17035124	17042882
C36E6.1	C36E6.1	C36E6.1 encodes two proteins by alternative splicing, belonging to an ancient family of single-stranded nucleic acid-binding proteins, that are predicted to regulate gene expression through binding either mRNA or (locally) single-stranded DNA; they are most likely to specifically bind one or more discrete mRNAs and regulate their spatial localization or alternative splicing.	coding	X	17434372	17438007
ZK54.2	tps-1		coding	X	17467046	17474460
