# Supplementary material
Source: HighWire-hosted journal article supplement (doi:10.1101/rna.053397.115)
Supplement: Table_S2.xlsx [file Table_S2.xlsx]

## Sheet: N2 409 genes up 
Gene ID	Chr	Start	End	PRPs RNAi FPKM	Control gfp RNAi FPKM	Log2 fold change	P-value (Gene differential expression)	Q-value (Gene differential expression)	Gene Description	GFPRNAi L3 FPKM	prp6RNAi L3 FPKM	prp8RNAi L3 FPKM	prp31RNAi L3 FPKM
T06E4.3	V	9638428	9645502	44.1667	11.1069	1.9915	5e-05	0.0268463	atl-1	8.16698	31.9984	54.9765	14.7293
C38C6.3	II	14633184	14634657	25.9307	4.8874	2.40753	5e-05	0.0268463	C38C6.3	3.76895	49.8281	5.61029	9.60218
C50F7.5	IV	7726718	7727951	134.135	18.2339	2.87899	5e-05	0.0268463	C50F7.5	21.7073	28.3431	466.112	20.9304
K02D7.3	IV	326634	326671	16.3274	1.2698	3.68461	5e-05	0.0268463	col-101	1.08493	1.3193	34.147	1.59978
T08B2.2	I	6232777	6234280	1.23232	0	33.33	5e-05	0.0268463	col-56	0.048852	2.20805	0.498864	0.413411
D2024.4	IV	7231235	7232738	17.798	3.4169	2.38096	5e-05	0.0268463	D2024.4	3.18481	42.6535	3.80961	8.3769
F23B12.9	V	14432290	14432359	4.05454	0	33.33	5e-05	0.0268463	egl-1	0.497456	1.22864	9.41464	1.02466
F08G2.5	II	13832853	13833631	758.545	63.8987	3.56938	5e-05	0.0268463	F08G2.5	43.6764	716.779	818.424	87.5348
F15B9.8	V	12988532	12992186	105.77	19.5116	2.43853	5e-05	0.0268463	F15B9.8	18.8607	251.364	30.1163	43.7074
F15D4.5	II	13245430	13247774	10.0831	0.87525	3.52611	5e-05	0.0268463	F15D4.5	0.78861	8.19524	15.3428	3.46501
F19B10.13	II	3662258	3662986	94.5238	3.24375	4.86494	5e-05	0.0268463	F19B10.13	2.21719	77.0961	115.024	8.84507
F30A10.2	I	9480385	9480678	25.9211	5.61971	2.20556	5e-05	0.0268463	F30A10.2	5.32969	54.5109	8.44692	10.6803
F40E10.5	X	14701791	14703684	62.2633	15.0912	2.04468	5e-05	0.0268463	F40E10.5	13.9298	128.237	5.2718	43.4551
F37B1.1	II	13611156	13611342	320.734	32.0121	3.32469	5e-05	0.0268463	gst-24	26.3568	262.521	522.971	62.4145
C10H11.10	I	4760783	4761323	15.8638	3.73778	2.08548	5e-05	0.0268463	kca-1	4.19503	17.2009	30.275	9.92572
ZC13.4	X	897884	898070	35.7253	6.9576	2.36028	5e-05	0.0268463	mab-7	5.98178	78.7274	1.60069	19.9552
T21E8.3	X	10864321	10864422	12.117	0.659144	4.20029	5e-05	0.0268463	pgp-8	0.513408	6.89627	22.6146	1.08118
Y18D10A.7	I	12834665	12843233	3.90599	0.715564	2.44854	5e-05	0.0268463	ptr-17	0.639178	8.02497	1.57274	1.63419
R74.2	III	4188255	4189287	102.544	17.1756	2.57782	5e-05	0.0268463	R74.2	12.074	190.675	2.96073	42.4611
F49E11.10	IV	13057678	13059092	215.496	39.2916	2.45536	5e-05	0.0268463	scl-2	29.4266	99.3882	383.237	33.3502
T26H5.9	V	15444910	15445372	427.151	82.051	2.38015	5e-05	0.0268463	T26H5.9	65.6076	313.877	648.26	77.8253
F10D2.2	V	7157142	7159188	15.9739	2.68407	2.57322	5e-05	0.0268463	ugt-39	2.43029	11.0702	28.9762	3.61254
W06H8.12	V	6227322	6227605	5.40684	0	33.33	5e-05	0.0268463	W06H8.12	0	5.02634	5.57927	0.964043
Y53F4B.25	II	15135493	15145273	6.86605	1.13312	2.59918	5e-05	0.0268463	Y53F4B.25	1.03269	15.7632	1.17278	2.69251
ZK1290.5	II	7529646	7530991	28.5658	4.74849	2.58875	5e-05	0.0268463	ZK1290.5	4.09772	30.8319	31.6793	8.26162
ZK177.9	II	5517631	5517743	3.57149	0	33.33	5e-05	0.0268463	ZK177.9	0	3.82207	3.51364	1.33252
C02D5.1	III	8561185	8562972	30.2328	5.66452	2.41609	0.0001	0.0402694	acdh-6	4.57246	66.261	2.36839	13.2776
C02F4.4	IV	10514922	10515283	35.1497	8.99113	1.96694	0.0001	0.0402694	C02F4.4	7.58856	65.0744	17.2723	11.4053
C06E7.88	IV	5867202	5867372	1.29338	0	33.33	0.0001	0.0402694	C06E7.88	0	1.32227	2.04204	0.211471
C10E2.5	X	16753414	16753673	1.39008	0	33.33	0.0001	0.0402694	C10E2.5	0.237501	1.27182	1.61278	1.08006
C46F4.3	X	5935780	5937549	2.1345	0	33.33	0.0001	0.0402694	C46F4.3	0	4.14556	0.636504	1.04393
B0218.8	IV	8168659	8168774	35.3368	8.2683	2.09551	0.0001	0.0402694	clec-52	6.83891	32.5293	56.1091	7.89413
Y82E9BL.18	III	1328644	1331066	9.06104	1.14516	2.98412	0.0001	0.0402694	Y82E9BL.18	0.920881	8.66427	12.0722	1.16881
ZK180.6	IV	4524862	4524937	91.9994	16.5658	2.47341	0.0001	0.0402694	ZK180.6	12.9741	189.24	4.23962	45.6634
F40H7.12	II	3688257	3688691	3.16569	0	33.33	0.00015	0.0508667	F40H7.12	0	0.050702	7.24008	0.111892
F46C8.8	X	7554329	7554426	41.1425	10.136	2.02114	0.00015	0.0508667	F46C8.8	9.7335	102.252	3.83379	28.729
Y75B8A.20	III	12235412	12235711	175.96	36.2796	2.27802	0.00015	0.0508667	grl-15	27.2778	338.371	47.0746	43.8768
R09D1.12	II	9452073	9452263	0.753337	0	33.33	0.00015	0.0508667	R09D1.12	0	0.053488	1.63062	0.157348
Y48G1C.1	I	93031	94881	19.3814	4.69704	2.04485	0.00015	0.0508667	Y48G1C.1	4.11608	11.2442	29.1436	7.39078
C09C7.1	X	7925437	7926589	82.8832	23.3679	1.82655	0.00015	0.0508667	zig-4	17.7824	65.3253	109.521	24.065
F52D1.3	X	457572	457648	17.6619	4.39107	2.008	0.0002	0.0508667	abu-12	3.90031	37.3418	1.35341	11.3935
F25H8.6	IV	9916528	9921969	42.9189	9.01927	2.25053	0.0002	0.0508667	bed-3	6.95431	90.1705	6.29577	12.7304
C32H11.5	IV	12924142	12924378	48.8532	11.9443	2.03213	0.0002	0.0508667	C32H11.5	9.00158	88.4345	11.6792	23.2625
C55A1.6	V	15648069	15648804	32.8515	3.43173	3.25895	0.0002	0.0508667	C55A1.6	2.73662	6.78108	105.062	2.9733
ZK512.3	III	9119559	9125150	5.23373	1.5342	1.77035	0.0002	0.0508667	ced-11	1.17039	7.0563	3.56276	3.25995
C29F3.5	V	15349012	15349144	52.9063	11.95	2.14643	0.0002	0.0508667	clec-230	11.5214	132.024	2.93035	35.6077
F41C6.5	X	6877462	6877534	62.7262	14.1091	2.15244	0.0002	0.0508667	col-173	11.6958	128.524	5.56643	33.1172
C24B9.9	V	2730888	2731097	134.93	36.9301	1.86934	0.0002	0.0508667	dod-3	28.7575	160.771	110.8	57.5752
F18F11.4	IV	330860	334399	11.6338	1.78339	2.70563	0.0002	0.0508667	F18F11.4	1.54718	27.0811	1.24458	3.60931
T12A7.1	IV	11745640	11748685	23.7992	8.24925	1.52858	0.0002	0.0508667	gem-4	6.60554	22.4081	27.6637	8.63265
H23N18.5	V	4912242	4912383	306.504	72.0539	2.08876	0.0002	0.0508667	H23N18.5	51.9522	590.337	14.7395	144.093
R09B5.6	V	1460367	1461614	33.8748	8.18955	2.04836	0.0002	0.0508667	hacd-1	6.32593	23.7651	41.8646	13.9453
R11G11.6	V	505522	506068	27.5043	3.0265	3.18394	0.0002	0.0508667	R11G11.6	2.5284	54.8136	5.50383	11.5658
Y34B4A.10	X	5249851	5252781	28.7078	7.4308	1.94985	0.0002	0.0508667	Y34B4A.10	6.18749	56.9074	6.28392	11.9719
ZK1025.3	I	11462753	11463068	172.309	39.864	2.11184	0.0002	0.0508667	ZK1025.3	31.3517	380.889	25.0312	61.1998
F52E4.5	X	3087229	3087345	68.498	22.0316	1.63648	0.00025	0.0566289	F52E4.5	18.4277	84.4198	67.0918	24.8669
ZK20.6	II	11656202	11657173	84.409	24.1975	1.52219	0.00025	0.0566289	nep-1	17.3351	98.5737	28.063	31.0907
E03H12.1	IV	4992389	4993857	0.495967	0	33.33	0.00025	0.0566289	str-162	0.044886	0.405702	0.598829	0.325528
T01D1.4	II	178929	179093	177.41	38.9176	2.18859	0.00025	0.0566289	T01D1.4	32.9751	382.438	19.49	93.5959
C29F3.2	V	15344406	15344572	13.6619	3.03836	2.1688	0.00025	0.0566289	wrt-8	2.74089	33.103	1.16917	8.24571
Y11D7A.5	IV	9245291	9245523	19.6256	4.57768	2.10004	0.00025	0.0566289	Y11D7A.5	3.82429	40.3433	6.80663	6.94134
Y71G12B.17	I	1667501	1669774	28.81	7.21395	1.99771	0.00025	0.0566289	Y71G12B.17	5.796	49.6122	14.7261	10.534
Y47D7A.5	V	4414531	4414626	89.0853	18.8198	2.24294	0.0003	0.0612549	grl-5	14.8164	200.778	8.0463	34.7785
T02E9.2	V	11346514	11347014	107.072	26.321	2.0243	0.0003	0.0612549	grl-7	20.6341	208.184	28.27	41.2716
K02E11.10	V	14239924	14241151	117.876	26.5713	2.14932	0.0003	0.0612549	K02E11.10	18.1622	200.578	4.61687	59.2477
F15E6.2	IV	4301308	4304460	90.8221	22.7047	2.00005	0.0003	0.0612549	lgc-22	18.1182	185.059	21.6439	36.753
F58G1.5	II	12935092	12935357	20.3955	4.29791	2.24655	0.0003	0.0612549	lips-9	3.59307	45.4559	1.77356	10.3797
F57H12.3	IV	7977836	7979014	125.27	31.1973	2.00555	0.0003	0.0612549	ora-1	26.0497	258.102	6.97721	75.516
T19C3.2	III	617350	617447	35.3753	8.85399	1.99834	0.0003	0.0612549	T19C3.2	9.96284	104.028	7.4596	22.9584
C28H8.5	III	5884307	5885775	14.1953	2.61927	2.43818	0.00035	0.0650506	C28H8.5	2.33286	33.9352	0.640073	7.9374
C02A12.4	V	3482355	3482602	412.16	111.579	1.88513	0.00035	0.0650506	lys-7	88.389	213.834	669.612	114.514
F09E8.6	IV	13170544	13173694	18.6221	4.91829	1.92079	0.00035	0.0650506	nas-14	4.12453	35.6337	1.43532	11.2943
R07B1.13	X	9869836	9870802	17.9245	4.04692	2.14703	0.00035	0.0650506	R07B1.13	3.20876	36.6076	4.22198	7.09158
Y38A10A.2	V	6063293	6063425	13.8707	3.75717	1.88432	0.00035	0.0650506	Y38A10A.2	3.85219	32.0792	6.03689	6.45169
Y53F4B.27	II	15145948	15151917	23.3189	6.37529	1.87094	0.00035	0.0650506	Y53F4B.27	5.91898	54.5483	4.4028	12.9726
Y6E2A.4	V	15715582	15715644	6.36439	1.24295	2.35625	0.00035	0.0650506	Y6E2A.4	1.19474	3.55361	12.2287	1.15435
F57B9.9	III	6944577	6944738	78.1143	22.1479	1.81842	0.0004	0.0707171	abu-13	19.0991	170.816	22.5418	32.1341
C30H6.12	IV	17383370	17386783	14.7452	1.0796	3.77167	0.0004	0.0707171	C30H6.12	0.922419	5.23869	31.6338	1.56424
T19D7.3	X	656188	658514	13.8909	2.99567	2.21319	0.0004	0.0707171	lpr-7	2.70286	39.5668	1.95859	7.26289
K09C4.6	X	3274757	3275613	0.800979	0	33.33	0.00045	0.0749845	K09C4.6	0.172338	0.496356	0.819604	0.5739
B0240.4	V	11733394	11733479	66.9768	23.7358	1.4966	0.00045	0.0749845	npp-22	19.872	68.8127	71.2272	34.0347
R12E2.15	I	4149284	4149429	853.737	244.592	1.80341	0.00045	0.0749845	R12E2.15	197.186	1602.73	12.9929	603.817
T17H7.7	III	757977	758075	46.1606	13.6655	1.75612	0.00045	0.0749845	T17H7.7	10.6606	82.4503	7.51429	31.2491
C01F6.5	IV	9108931	9109751	181.329	60.0159	1.59519	0.0005	0.0779409	aly-1	45.0152	156.952	191.023	71.5199
F01D5.6	II	14006511	14008576	38.7501	10.7931	1.84409	0.0005	0.0779409	F01D5.6	9.0748	85.2044	9.1442	17.6078
T21H3.2	V	1170129	1174814	18.5901	4.64327	2.00132	0.0005	0.0779409	ptr-16	3.42974	35.4163	1.51644	8.47674
R07B1.5	X	9864069	9866558	5.26464	0.826293	2.67161	0.0005	0.0779409	R07B1.5	0.753057	10.4237	2.35982	1.41042
C13D9.1	V	5012994	5015212	14.6536	4.41211	1.73172	0.0005	0.0779409	srr-6	3.33662	16.0472	8.08243	11.4141
T04A6.5	III	7603714	7604326	41.7319	6.75178	2.62781	0.0005	0.0779409	T04A6.5	5.33098	38.8039	67.936	17.0699
F36A4.6	IV	4263341	4265202	18.5422	4.93593	1.90942	0.00055	0.0813607	col-33	3.47455	31.7834	1.70151	9.13214
F52E1.5	V	8379506	8383588	20.6131	4.70145	2.13239	0.00055	0.0813607	F52E1.5	4.32847	39.5293	6.4656	11.3462
Y105C5A.13	IV	15641215	15645546	6.60509	0.969195	2.76872	0.00055	0.0813607	Y105C5A.13	3.21584	7.19077	15.6422	3.50659
Y11D7A.9	IV	9255978	9256099	36.1864	9.42052	1.94157	0.00055	0.0813607	Y11D7A.9	10.0344	96.061	11.2673	20.2279
Y62E10A.19	IV	13407995	13408271	40.1177	11.5481	1.79659	0.00055	0.0813607	Y62E10A.19	9.40983	74.7152	16.3629	20.2514
F59F5.7	X	10559535	10566668	3.30606	0.792721	2.06023	0.0006	0.0844485	F59F5.7	0.805446	8.38409	0.878553	2.04175
F58E1.6	II	1670833	1674513	2.49622	0.249353	3.32349	0.0006	0.0844485	nhx-6	0.191745	1.52173	4.35585	0.630258
Y67A10A.8	IV	14383608	14383681	12.1453	3.09026	1.9746	0.0006	0.0844485	paqr-3	2.85547	25.9004	4.04644	5.57769
R07E5.4	III	4394794	4396616	43.1865	12.6411	1.77246	0.0006	0.0844485	R07E5.4	11.9376	81.3552	12.3481	35.737
T28A11.19	V	3269353	3269510	8.41959	1.01907	3.0465	0.0006	0.0844485	T28A11.19	0.835871	1.91907	16.7173	0.800728
C06G1.2	X	16621814	16622739	21.8823	5.27587	2.05228	0.00065	0.0872505	C06G1.2	3.99455	40.5876	1.92061	11.4726
F15B9.12	V	12988154	12988442	6.3557	0	33.33	0.00065	0.0872505	F15B9.12	0	12.9754	1.27537	0
F49H12.2	X	2086057	2086910	0.939967	0	33.33	0.00065	0.0872505	F49H12.2	0	0.736221	1.09486	0.344701
F53B7.3	V	11000609	11000792	92.932	33.1039	1.48918	0.00065	0.0872505	F53B7.3	26.0027	94.7491	95.2664	42.4221
K08E7.5	IV	12573370	12578846	9.91819	3.04307	1.70455	0.00065	0.0872505	K08E7.5	2.61925	17.1083	5.73893	4.72924
ZK1025.7	I	11465142	11467609	21.4405	5.87456	1.86779	0.0007	0.0890167	bah-1	5.37356	47.0635	5.26347	8.11344
C08E8.4	V	18371846	18373531	77.254	27.8095	1.47403	0.0007	0.0890167	C08E8.4	23.8993	74.6295	124.015	30.4035
F44G3.10	V	16139485	16139627	25.4716	6.57037	1.95484	0.0007	0.0890167	F44G3.10	6.5494	14.4013	47.5481	6.97015
C08E3.6	II	1610519	1610715	35.6826	0.380494	6.5512	0.0007	0.0890167	fbxa-163	0.334385	35.2205	59.371	2.24468
K07C5.6	V	10355708	10355824	74.9902	29.3336	1.35415	0.0007	0.0890167	K07C5.6	22.16	66.4429	69.6347	36.1121
C30A5.10	III	8209332	8209875	1.87818	0.315076	2.57557	0.00075	0.0929295	C30A5.10	0.296128	3.28192	0.586447	1.09215
T05G5.12	III	9735932	9736028	62.6955	17.5812	1.83432	0.00075	0.0929295	dao-6	15.0692	101.134	11.6208	50.1265
T05B4.13	V	4127139	4127211	1.38371	0	33.33	0.00075	0.0929295	T05B4.13	0	1.7822	0.305509	1.46612
W09G10.6	II	3516008	3518898	2.48424	0.387731	2.67968	0.0008	0.0942894	clec-125	0.285411	1.1883	4.11946	0.307687
F46B3.5	V	20609863	20613784	4.48826	1.10421	2.02314	0.0008	0.0942894	grd-2	0.897165	9.67234	0.887531	1.73617
T04H1.6	V	12252647	12255394	13.2909	3.89791	1.76967	0.0008	0.0942894	lrx-1	3.28478	26.8026	3.2015	8.37884
D1054.15	V	10807832	10807912	142.877	55.02	1.37675	0.0008	0.0942894	plrg-1	41.4708	131.973	142.007	63.7591
D1054.14	V	10805905	10806040	66.4708	24.5893	1.43469	0.0008	0.0942894	prp-38	18.3818	55.6915	70.1518	28.0274
Y51H4A.5	IV	16526031	16526132	7.19725	1.8618	1.95075	0.0008	0.0942894	Y51H4A.5	1.57976	7.66192	9.22708	2.9702
C15A11.4	I	7400853	7401023	9.07171	2.31403	1.97097	0.00085	0.0962691	C15A11.4	2.37255	18.4107	3.92504	4.4826
C16C8.2	II	3436402	3436512	26.3906	8.53138	1.62917	0.00085	0.0962691	C16C8.2	7.98506	50.193	3.56405	20.0193
C14C11.8	V	5675912	5676087	20.1345	6.53942	1.62244	0.00085	0.0962691	pqn-13	5.65083	35.7216	5.01879	14.7679
F08F1.6	X	8418353	8418451	41.2812	11.0252	1.90469	0.00085	0.0962691	spp-13	9.41997	88.1582	13.0243	15.755
EGAP4.1	X	8727147	8727406	29.6501	8.78825	1.75439	0.0009	0.0995977	EGAP4.1	6.61787	13.161	45.2828	8.88301
F29C12.1	II	13108019	13110170	103.526	22.6703	2.19112	0.0009	0.0995977	pqn-32	17.9429	199.856	31.2757	38.9244
T13H5.3	II	8520911	8523471	13.1289	3.69567	1.82884	0.0009	0.0995977	T13H5.3	3.12437	25.2151	3.9433	6.5019
C39E9.3	IV	13067157	13067288	33.224	9.38597	1.82365	0.00095	0.102777	col-131	7.39502	64.3948	2.50062	17.7915
K09B11.10	IV	13445125	13445309	10.939	3.13951	1.80087	0.00095	0.102777	mam-3	2.57331	24.4535	1.21247	6.08177
ZK470.6	X	4177209	4177307	9.66216	2.0422	2.24222	0.00095	0.102777	ZK470.6	2.3265	20.8256	0.943861	6.87611
ZC373.6	X	10075288	10076358	0.689689	0	33.33	0.001	0.106596	dao-4	0	1.23073	0.141488	0.289709
EEED8.4	II	5410467	5411245	0.74559	0	33.33	0.001	0.106596	EEED8.4	0	0.399578	1.04108	0.125982
C34C6.3	II	8691922	8694182	25.2761	8.25865	1.6138	0.00105	0.107956	C34C6.3	7.28627	43.1861	13.0906	12.8386
F01D5.10	II	14020687	14020945	9.74428	2.61421	1.89818	0.00105	0.107956	F01D5.10	2.25302	22.9444	0.913216	5.90277
C08E3.10	II	1621065	1621261	7.00486	1.91158	1.87359	0.00105	0.107956	fbxa-158	1.41254	4.98937	9.87143	1.72804
M110.9	II	8231313	8232769	11.8408	2.40052	2.30235	0.00105	0.107956	M110.9	1.98625	25.1568	0.54763	5.96082
R12C12.10	II	6043107	6043275	45.9335	12.0207	1.93402	0.00105	0.107956	R12C12.10	8.5387	87.3291	3.50998	21.336
F28G4.1	V	16278191	16280614	9.14641	2.80139	1.70706	0.0011	0.109224	cyp-37B1	2.12466	13.2033	6.76275	4.53012
ZK863.3	V	12181291	12181412	80.5662	31.3113	1.36349	0.0011	0.109224	elpc-3	24.5133	77.2775	80.5541	43.4059
F47B7.5	X	3768662	3768817	1.01402	0	33.33	0.0011	0.109224	F47B7.5	0	2.52331	0.073755	0.337584
R03H10.6	II	4173290	4173875	4.95698	1.3375	1.88993	0.0011	0.109224	R03H10.6	1.0742	3.84685	5.85215	1.66973
Y65B4A.6	I	636234	636350	106.429	38.7406	1.45797	0.0011	0.109224	Y65B4A.6	28.097	78.5943	113.22	48.4043
F19B10.1	II	3683177	3684609	18.0249	5.45919	1.72324	0.00115	0.11189	F19B10.1	4.35341	13.2486	21.9033	7.34474
F21C10.10	V	9096007	9097224	145.024	41.7747	1.79559	0.00115	0.11189	F21C10.10	37.012	135.013	206.701	61.9847
F49E12.9	II	8388125	8389891	31.2537	11.2237	1.47747	0.00115	0.11189	F49E12.9	13.2764	37.7937	27.9264	32.344
F13E9.14	IV	10891743	10892093	0.782709	0	33.33	0.0012	0.11445	F13E9.14	0.154988	0.637494	0.85813	0.23451
T04G9.2	X	777719	780514	24.1036	8.21501	1.55291	0.0012	0.11445	nas-15	7.28129	43.9847	6.77308	16.6892
Y49G5A.1	V	5287229	5287360	17.5862	3.82394	2.20131	0.0012	0.11445	Y49G5A.1	2.87514	3.94336	37.162	1.63537
B0464.7	III	9467457	9468066	666.941	228.955	1.54249	0.00125	0.114691	baf-1	180.296	559.585	837.742	246.148
F46C8.2	X	7546842	7548366	20.1672	6.18101	1.7061	0.00125	0.114691	col-174	4.91748	37.8456	1.62661	12.3112
K04G2.12	I	8043760	8044169	2.74102	0	33.33	0.00125	0.114691	K04G2.12	0	6.0277	0.206615	1.07267
B0213.17	V	3979044	3979134	161.865	45.398	1.83409	0.00125	0.114691	nlp-34	32.2091	296.253	11.2421	81.2455
T01B7.7	II	8733050	8734314	701.302	189.971	1.88425	0.00125	0.114691	rol-6	137.964	1235.71	133.648	281.905
B0344.2	X	1576635	1590895	8.41931	2.48442	1.76079	0.00125	0.114691	wrt-9	2.19455	17.366	2.93916	3.87308
T23F2.1	X	5492976	5496000	77.4887	25.0515	1.62909	0.00135	0.123088	bus-8	19.9109	160.127	21.9283	33.404
M02G9.1	II	10326130	10335762	9.32445	3.25047	1.52037	0.00145	0.130563	M02G9.1	2.61306	14.7106	1.72728	6.76701
BE10.2	III	12798052	12798157	58.0984	20.1142	1.53028	0.0015	0.133408	agmo-1	16.7561	112.916	6.16384	41.4639
Y119D3B.21	III	1214952	1215287	4920.53	1578.72	1.64006	0.0015	0.133408	Y119D3B.21	1079.32	3001.4	7187.32	1176.24
F26B1.4	I	6311251	6312413	57.9267	18.8702	1.61812	0.00155	0.135364	col-58	15.0318	93.0857	0.875988	47.6874
F01F1.7	III	5853192	5853269	97.8089	36.7396	1.41263	0.00155	0.135364	ddx-23	27.7704	93.2793	102.097	43.2923
R11A8.2	IV	10358085	10360220	59.7071	22.8033	1.38866	0.00155	0.135364	R11A8.2	17.395	52.5198	63.6161	27.0436
F11G11.10	II	4866689	4867574	833.618	240.087	1.79583	0.0016	0.136442	col-17	463.981	3686.51	396.611	1183.08
K08D12.8	IV	1726140	1727917	26.3783	6.11373	2.10923	0.0016	0.136442	K08D12.8	4.87537	48.7611	0.760896	15.5638
Y46G5A.29	II	12856195	12862035	7.74024	2.39855	1.69021	0.0016	0.136442	Y46G5A.29	2.18033	15.6292	3.19508	2.88211
F56G4.1	I	11347185	11347288	1.6642	0.154337	3.43067	0.00165	0.136686	oac-34	0.126592	3.20453	0.510375	0.547728
B0491.2	II	11337808	11337835	794.014	241.464	1.71735	0.00165	0.136686	sqt-1	170.429	1372.19	237.595	237.001
ZC434.3	I	10335545	10335739	22.3929	7.49158	1.5797	0.00165	0.136686	ZC434.3	6.24178	44.0448	5.16565	9.57107
ZC504.3	X	10419653	10419751	17.4166	5.98899	1.54008	0.00165	0.136686	ZC504.3	4.52079	14.7494	20.1085	7.29504
ZK1307.3	II	9652860	9653016	0.968354	0	33.33	0.00165	0.136686	ZK1307.3	0.128461	1.37629	0.514331	1.01303
F08F1.9	X	8410328	8410494	1.69453	0	33.33	0.0017	0.139237	F08F1.9	0.170162	1.12347	2.88937	0.7239
F08B4.2	IV	8669142	8677974	5.73346	2.12422	1.43247	0.00175	0.14173	cdh-5	1.90406	9.11425	4.27829	2.68988
T22B7.3	X	5647381	5650200	26.4686	8.50485	1.63792	0.00175	0.14173	T22B7.3	9.9584	47.9219	15.7309	21.9562
F23H12.7	V	12371730	12372870	0.697483	0	33.33	0.0018	0.142593	F23H12.7	0	0.668885	0.40396	0.430691
F49E12.12	II	8381503	8383738	15.6794	5.04021	1.63732	0.0018	0.142593	F49E12.12	5.21073	35.5419	1.28367	14.3653
K09C4.5	X	3282611	3285723	1.87729	0.368722	2.34804	0.0018	0.142593	K09C4.5	0.277234	2.60751	3.22846	0.456557
Y48G10A.2	I	13487365	13487404	19.9291	7.2255	1.46371	0.0018	0.142593	Y48G10A.2	6.72229	17.0999	27.5723	10.7425
K02E2.8	V	20366869	20366937	17.3274	4.75603	1.86523	0.00185	0.14342	K02E2.8	4.49384	43.4701	0.151914	15.8109
C24F3.3	IV	10224054	10226315	7.34485	1.90942	1.9436	0.00185	0.14342	nas-12	1.50288	15.5795	0.340976	5.44843
Y38F1A.3	II	12965568	12978156	42.0691	13.5516	1.6343	0.00185	0.14342	ptr-18	10.7832	80.8348	7.49005	20.3229
R09E10.5	IV	10302104	10302359	1.79279	0.531065	1.75525	0.00185	0.14342	R09E10.5	0.390919	3.1164	0.506976	0.904229
B0280.7	III	7111661	7111873	30.5556	10.3885	1.55644	0.0019	0.14497	B0280.7	8.76696	57.1624	4.85046	18.8158
Y65B4A.11	I	630926	631035	491	0	33.33	0.0019	0.14497	Y65B4A.11	0	590.988	248.406	274.295
M01E10.2	III	2047935	2047997	14.4849	5.28929	1.4534	0.00195	0.145717	dpy-1	4.63658	24.9747	2.14114	13.6494
Y74E4A.1	II	4649094	4653276	56.5107	18.0472	1.64675	0.00195	0.145717	lgc-27	17.4272	113.436	17.3474	36.3491
C54A12.1	II	5246749	5246837	13.7117	4.51168	1.60367	0.00195	0.145717	ptr-6	3.81745	26.1922	1.96293	9.19115
T24F1.7	II	11312473	11313349	36.7183	4.88965	2.90869	0.00195	0.145717	T24F1.7	4.77457	68.5383	5.64801	20.0118
F25H5.8	I	9178641	9178779	1.25806	0	33.33	0.002	0.147178	F25H5.8	0	2.39196	0.105717	0.880346
Y75B7AR.1	V	1391943	1392056	198.498	74.3887	1.41597	0.002	0.147178	Y75B7AR.1	58.2406	297.55	97.2583	100.03
F10A3.1	V	16141033	16141164	6.58656	0.704565	3.22472	0.00205	0.148594	F10A3.1	0.577906	3.40938	12.7044	1.22521
F27E5.4	II	10137656	10139217	68.9385	24.6403	1.48429	0.00205	0.148594	phg-1	19.3042	111.998	22.8508	39.0774
F52G3.5	X	16976040	16976130	2.57068	0.526616	2.28733	0.00215	0.155067	F52G3.5	0.539934	5.55872	0.64833	1.58745
F47B3.4	I	3960974	3962199	0.580225	0	33.33	0.0022	0.15634	F47B3.4	0.210326	0.043217	4.05143	0.127157
F39D8.4	X	15427986	15428090	3.60754	0.916529	1.97676	0.0022	0.15634	nas-13	0.956193	7.31193	0.490237	2.25058
W02D9.6	I	12560260	12560709	1.14923	0	33.33	0.0022	0.15634	W02D9.6	0	0.337563	1.64263	0.414145
F39D8.3	X	15421071	15425023	5.15262	1.31603	1.96911	0.00225	0.158341	F39D8.3	1.11667	10.5421	0.471214	2.96503
W02F12.8	V	6694646	6694723	67.7349	19.8849	1.76823	0.00225	0.158341	W02F12.8	14.9787	113.225	5.9604	40.9938
F08G12.2	X	11299585	11299687	67.2065	27.6766	1.27994	0.0023	0.159536	F08G12.2	20.9279	61.4792	65.5251	33.6785
F55C9.3	V	19288066	19288159	0.641853	0	33.33	0.0023	0.159536	F55C9.3	0	0.657011	1.21977	0.329668
W03B1.3	IV	4335213	4335372	0.452035	0	33.33	0.0023	0.159536	W03B1.3	0	0.154589	0.886382	0.085276
C01B10.11	IV	6657979	6660436	124.488	49.8874	1.31926	0.00235	0.161459	C01B10.11	42.5324	222.645	72.5674	59.1673
C04G6.2	II	5093236	5094214	9.52206	2.12447	2.16417	0.00235	0.161459	C04G6.2	1.96464	19.1538	0.473855	6.56804
R09E10.13	IV	10295051	10295267	62.102	20.5731	1.59388	0.0024	0.164117	R09E10.13	15.6848	98.977	17.3867	31.6792
ZK84.1	II	6020653	6023349	69.8978	17.9368	1.96232	0.0025	0.170153	ZK84.1	13.2861	134.552	11.246	29.5516
M02G9.2	II	10321461	10324850	6.2938	1.83205	1.78047	0.00255	0.171328	M02G9.2	1.4128	14.8604	0.552671	4.89714
Y41E3.2	IV	14986672	14986782	1119.38	355.436	1.65504	0.0026	0.171328	dpy-4	297.359	2104.78	205.541	718.929
Y22F5A.4	V	10277827	10279127	1520.65	561.807	1.43654	0.0026	0.171328	lys-1	465.751	1106.55	2146.6	640.258
T05H4.7	V	6414993	6417429	10.6105	3.30311	1.68359	0.0026	0.171328	T05H4.7	2.82935	19.996	1.4745	6.5242
Y43F8A.5	V	19390037	19390120	7.25678	2.36859	1.6153	0.0026	0.171328	Y43F8A.5	2.25013	7.12058	11.0655	3.7451
C01B12.1	II	23328	24457	554.047	187.809	1.56074	0.00265	0.172274	sqt-2	142.805	1071.03	193.13	199.403
ZK1320.11	II	9667624	9668672	56.4464	23.3707	1.27218	0.00265	0.172274	ZK1320.11	19.1436	55.8111	64.9025	26.832
F28D1.9	IV	12398554	12398706	48.8152	17.6171	1.47036	0.0027	0.173334	acs-20	14.2042	87.4586	14.755	24.8514
R09D1.5	II	9448273	9449726	3.04327	0.580323	2.39069	0.0027	0.173334	R09D1.5	0.396666	0.407246	5.82022	0.459242
C50F2.3	I	3877061	3880755	99.9758	36.2748	1.18002	0.00275	0.173334	C50F2.3	26.8372	67.0271	88.059	35.8517
F55G11.4	IV	12973636	12975597	126.453	49.8469	1.34302	0.00275	0.173334	F55G11.4	47.0777	108.437	230.121	62.8382
T19D7.6	X	670681	670800	8.66716	2.41421	1.84401	0.00275	0.173334	T19D7.6	2.39668	12.4119	10.0716	2.90125
T24A6.7	V	3525274	3526307	7.94278	2.17411	1.86922	0.00275	0.173334	T24A6.7	2.00295	4.99398	14.4179	1.75873
cTel3X.1	V	1480	3039	1.32822	0	33.33	0.00285	0.178088	cTel3X.1	0	4.00021	0.581659	1.74582
Y61A9LA.7	V	4559533	4559801	19.4714	5.59165	1.80001	0.00285	0.178088	Y61A9LA.7	4.80204	37.0313	4.12878	9.79564
T07G12.3	IV	10533943	10536430	4.04517	1.19609	1.75788	0.00295	0.181971	T07G12.3	1.12414	9.32281	1.32958	1.76879
ZC84.1	III	9206001	9206252	1.55155	0.485692	1.6756	0.00295	0.181971	ZC84.1	0.374545	2.48682	0.549666	0.909126
ZK84.2	II	6014374	6015838	0.45653	0	33.33	0.00295	0.181971	ZK84.2	0	0.478723	0.402362	0.308169
F30B5.1	IV	4235614	4236706	1156.75	386.381	1.58199	0.003	0.181971	dpy-13	313.526	2071.5	218.963	805.702
F13C5.3	X	599442	599553	2.5376	0.425586	2.57594	0.003	0.181971	F13C5.3	0.509073	5.37648	0.284781	1.82332
R10H1.5	II	7493572	7493643	11.4698	3.83779	1.57949	0.003	0.181971	nas-23	3.3534	21.4965	0.169061	11.5217
C07A9.2	III	9696123	9696517	78.85	32.9859	1.25726	0.00305	0.18271	C07A9.2	28.2755	81.8554	88.3441	43.6095
C25F6.8	X	5448270	5449968	11.0157	3.05238	1.85155	0.00305	0.18271	C25F6.8	3.12957	24.0368	2.13646	10.8958
D1054.9	V	10790804	10791051	33.7489	12.723	1.4074	0.00305	0.18271	D1054.9	10.43	62.9236	13.4393	17.6483
DY3.5	I	8777445	8777511	15.8729	5.64103	1.49254	0.0031	0.184135	pqn-26	4.21995	28.2354	2.59106	10.4496
F27C1.8	I	5432158	5433056	1321.79	448.336	1.55984	0.00315	0.184135	dpy-5	323.557	2240.5	203.01	833.255
T19H12.8	V	4884469	4884696	1.74211	0.254201	2.7768	0.00315	0.184135	nhr-220	0.289588	1.64092	1.947	0.804507
T03D8.5	V	20824811	20825028	1.86328	0.598663	1.63803	0.0033	0.188347	gcy-22	0.601188	1.89928	1.91165	1.18828
C17C3.4	II	5556761	5557088	2.18476	0	33.33	0.0033	0.188347	ins-11	0.681172	1.12982	1.70693	2.08573
F47F6.3	II	1266787	1266890	1.34152	0.225653	2.57169	0.0033	0.188347	oac-30	0.264411	2.82212	0.085988	0.811498
R08D7.1	III	8967612	8967727	42.008	17.3706	1.27401	0.00335	0.189707	R08D7.1	13.5481	34.4105	49.4625	19.9415
ZK287.4	V	9685542	9685659	2.67079	0.901347	1.56711	0.00335	0.189707	ZK287.4	0.72232	4.15415	1.18699	1.5324
K02E2.4	V	20375540	20376299	71.8019	25.9133	1.47033	0.00345	0.193107	ins-35	19.3729	63.8309	75.1321	27.6019
W03H9.2	II	14143788	14143845	6.04817	1.43975	2.07068	0.00345	0.193107	W03H9.2	1.21121	3.11351	9.8155	2.61134
F59D6.1	V	3051584	3051987	1.22868	0	33.33	0.0035	0.193293	F59D6.1	0	0.326157	1.28481	0.961056
K10G6.2	II	3976273	3978036	2.70729	0.422512	2.67978	0.00355	0.193293	dos-2	0.336931	5.10255	1.02068	1.16376
W08G11.1	V	16347060	16349833	6.04881	1.66789	1.85863	0.00355	0.193293	W08G11.1	1.45454	14.0001	0.862675	2.94535
ZK678.5	X	15757166	15757269	13.257	4.62357	1.51967	0.00355	0.193293	wrt-4	4.0243	28.4862	3.86915	6.34208
Y105C5B.15	IV	15951909	15954841	18.353	7.31848	1.3264	0.00355	0.193293	Y105C5B.15	6.2955	12.3263	27.6218	7.832
ZK328.2	III	6009562	6012839	171.163	71.7249	1.25482	0.0036	0.193293	eftu-2	53.6911	156.659	167.965	81.497
T05H4.14	V	6433295	6433498	62.3476	27.401	1.1861	0.0036	0.193293	gad-1	20.4926	51.4266	63.9693	29.4439
R12E2.14	I	4149981	4150637	662.11	246.155	1.4275	0.0036	0.193293	R12E2.14	190.398	1113.05	14.0284	522.894
ZK688.9	III	7882825	7883003	24.1431	9.02866	1.41903	0.0036	0.193293	ZK688.9	8.41978	24.2759	29.4173	12.9545
C38C6.6	II	14627628	14630122	250.062	92.1539	1.44017	0.0037	0.196479	tag-297	67.1938	404.82	29.182	157.06
K03H9.2	II	6426293	6427513	2.79325	0.438647	2.67081	0.00375	0.19816	col-75	0.549682	5.66737	0.431904	1.69162
B0464.6	III	9465246	9465965	64.6417	28.512	1.24453	0.0038	0.19816	B0464.6	22.2003	0	0	0
F09B12.1	X	15107705	15107967	54.1869	21.8604	1.30962	0.0038	0.19816	mlt-9	17.9542	97.5303	31.0182	17.1156
ZK1290.3	II	7544106	7545332	411.209	150.355	1.4515	0.0038	0.19816	rol-8	114.82	719.693	137.155	149.881
ZK863.4	V	12184026	12184196	45.2914	20.0707	1.17415	0.0038	0.19816	ZK863.4	17.0361	46.0946	52.6549	23.7586
Y66D12A.9	III	11568135	11573343	155.126	71.6031	1.11535	0.00385	0.200048	Y66D12A.9	56.333	144.504	141.618	92.7005
F33D11.3	I	5842714	5844057	260.222	99.8201	1.38234	0.0039	0.200127	col-54	74.1516	427.694	3.18212	228.856
ZK1010.3	III	12979081	12980164	103.453	45.9411	1.17111	0.0039	0.200127	frg-1	37.1736	91.624	112.185	55.0568
M142.2	III	10911460	10916665	2.18371	0.616936	1.82358	0.004	0.200127	cut-6	0.491971	2.03899	2.52515	1.10335
F59B1.10	V	3647799	3647954	5.29941	1.78332	1.57126	0.004	0.200127	F59B1.10	1.41661	5.35758	4.56308	3.10439
F37B1.4	II	13612999	13613152	25.794	9.5271	1.43693	0.004	0.200127	gst-15	7.87166	20.3053	35.6647	7.49083
ZK652.1	III	7862068	7862576	149.982	63.8139	1.23284	0.004	0.200127	snr-5	68.2184	199.502	192.506	109.356
T23F6.1	IV	12719960	12720894	41.5063	14.1739	1.5501	0.004	0.200127	T23F6.1	13.1011	76.2099	1.05324	37.8019
C02E7.6	V	4919207	4919581	780.34	304.608	1.35715	0.00405	0.200127	C02E7.6	225.433	1108.91	31.6097	699.215
F33D11.4	I	5840289	5841888	0.640587	0	33.33	0.00405	0.200127	ceh-12	0	0.84488	0.326631	0.373041
F26A1.9	III	4829433	4829509	6.84497	2.17201	1.65601	0.00405	0.200127	F26A1.9	2.06948	13.5298	3.42477	3.77935
F54B8.1	V	15810784	15811379	0.722408	0	33.33	0.00405	0.200127	F54B8.1	0	1.04752	0.276857	0.420516
F42G2.4	II	2412322	2412741	5.99503	1.87772	1.67479	0.00405	0.200127	fbxa-182	1.58295	4.11266	9.49678	1.68048
Y41G9A.10	X	2946471	2946570	44.3538	14.5986	1.60323	0.00405	0.200127	Y41G9A.10	10.6763	10.8463	78.6694	8.7815
F19F10.9	V	7575518	7575674	85.796	36.743	1.22344	0.0041	0.200127	F19F10.9	30.4899	81.2371	95.1917	43.5381
R09A1.3	V	1027000	1027065	18.385	6.81161	1.43246	0.0041	0.200127	R09A1.3	6.13105	17.5762	29.4926	4.34639
T07F10.1	V	12859381	12863833	10.8697	4.03342	1.43024	0.0041	0.200127	T07F10.1	3.30578	18.6464	3.21035	7.41005
T08G5.3	V	14027293	14027468	11.2246	3.39911	1.72343	0.0041	0.200127	T08G5.3	2.95703	22.872	1.44542	6.81577
K01A2.7	II	305357	305530	8.47768	2.75202	1.62318	0.00415	0.201213	col-69	2.18819	14.5068	2.5568	4.08221
F11G11.12	II	4872316	4873127	791.233	292.519	1.43557	0.00415	0.201213	col-73	342.225	2046.43	101.665	993.863
T14B1.1	X	9667267	9668755	58.5573	23.8436	1.29625	0.0042	0.202007	T14B1.1	19.3518	30.5458	91.6402	24.3044
R09A8.4	X	12636901	12637056	31.008	10.7972	1.52198	0.00435	0.202772	col-182	8.03485	46.2388	0.328107	29.5866
C29E4.1	III	7948838	7950067	2086.23	424.931	2.06825	0.00435	0.202772	col-90	304.834	3128.98	203.244	0
K02B7.3	II	14694824	14695299	132.868	53.9105	1.30135	0.00435	0.202772	K02B7.3	39.8907	200.202	55.4893	68.2304
C06E4.8	IV	7285795	7285873	3.20125	0.33656	3.2497	0.0044	0.203143	C06E4.8	0.230047	1.22922	6.88121	0.556439
Y46G5A.5	II	12738193	12738334	89.7085	38.6355	1.21532	0.00445	0.204151	pisy-1	32.9976	64.7326	119.871	46.5565
H02K04.1	V	15341172	15341446	6.0524	1.45247	2.059	0.0045	0.205793	clec-229	1.79649	15.7472	0.224007	5.44923
M153.3	X	12142902	12143825	6.52993	1.78426	1.87174	0.00465	0.21132	M153.3	1.41215	13.7754	0.151825	3.68851
R10D12.1	V	13934548	13934645	36.5469	14.4864	1.33505	0.0047	0.211602	R10D12.1	11.1068	57.0231	13.2617	20.2001
T03D8.6	V	20820074	20820161	86.1344	38.2738	1.17023	0.0047	0.211602	T03D8.6	32.7129	117.557	76.9304	36.6736
Y32G9B.1	V	1829812	1830030	29.4048	11.8044	1.31672	0.0047	0.211602	Y32G9B.1	9.22521	46.9247	7.76194	17.6766
F33H12.4	II	2583237	2583346	1.93297	0.212793	3.1833	0.00475	0.212533	sri-74	0.145449	0.44804	4.10083	0.175742
W07A12.4	II	9148356	9152311	2.88828	0.857471	1.75205	0.00475	0.212533	W07A12.4	0.647798	2.86277	4.19811	1.26694
F23H12.4	V	12352994	12354314	871.976	321.867	1.43782	0.0048	0.21411	sqt-3	269.287	1801	349.474	358.776
Y110A7A.8	I	5127828	5129612	135.168	57.0132	1.24539	0.00485	0.215676	prp-31	40.6185	132.641	143.75	25.2796
F53B6.9	I	8946125	8946200	39.3972	14.0174	1.49087	0.0049	0.216571	fip-6	11.413	65.7522	8.6002	25.057
M03F8.1	V	5951435	5953841	19.1123	3.63654	2.39386	0.0049	0.216571	M03F8.1	3.52136	43.1411	2.95609	9.85071
F45B8.3	X	14961454	14961532	4.32585	0.992423	2.12396	0.005	0.219652	F45B8.3	0.678346	8.26439	0.485912	2.72271
F47B8.5	V	14327713	14327844	3.09258	0.759701	2.02531	0.005	0.219652	F47B8.5	1.08743	7.24859	0.560098	2.58705
D2096.5	IV	8359550	8359716	0.698144	0	33.33	0.00505	0.220044	D2096.5	0	0.661276	0.536008	1.05466
F53B1.4	X	2112978	2113084	96.5825	22.9309	2.07447	0.0051	0.220044	F53B1.4	19.3432	208.46	14.2571	45.3949
F53B2.10	IV	12516451	12516609	1.36622	0	33.33	0.0051	0.220044	F53B2.10	0	0.43647	2.56879	0.107146
M03E7.4	V	5613027	5613219	5.71325	1.89786	1.58994	0.0051	0.220044	M03E7.4	1.82112	12.444	0.467626	4.44378
Y67D2.7	III	1558456	1558529	27.4568	11.8529	1.21192	0.0051	0.220044	Y67D2.7	8.97219	20.7331	31.1925	13.428
ZK678.3	X	15749045	15749206	0.887295	0	33.33	0.0051	0.220044	ZK678.3	0	0.68691	2.09363	0.43334
B0244.5	III	5744870	5747195	1.99736	0.424799	2.23324	0.0052	0.223031	B0244.5	0.689607	2.11679	4.60483	1.16213
ZC132.4	V	4303099	4304394	1.81359	0.566048	1.67985	0.0052	0.223031	ZC132.4	0.420552	1.00803	2.51774	0.467086
ZC250.1	V	5799683	5805659	15.5887	6.2456	1.31959	0.00525	0.223851	cyn-17	5.32456	30.7438	4.7066	10.366
F31F6.5	X	14888487	14894326	10.1211	3.91494	1.3703	0.00525	0.223851	daf-6	3.35557	19.262	4.52226	4.41791
C15C6.1	I	12202230	12203717	48.3632	19.1559	1.33612	0.00535	0.226119	C15C6.1	16.25	93.6899	7.31752	35.878
F10C2.7	V	12053952	12056320	1.6091	0.330996	2.28137	0.0054	0.227569	F10C2.7	0.226244	2.78728	0.556339	0.624721
C50B6.3	V	13313598	13315814	28.3984	12.8246	1.14689	0.00545	0.228349	C50B6.3	9.33021	23.512	29.3181	12.8462
F52G3.6	X	16943323	16943517	54.8597	13.7082	2.00071	0.00545	0.228349	F52G3.6	9.36992	32.1725	68.877	14.6518
C33G3.3	X	14067862	14067984	71.5472	28.4687	1.32952	0.0055	0.229331	lgc-21	26.7671	149.093	1.40275	73.658
C52E4.6	V	11993624	11993767	86.7787	39.9062	1.12073	0.00555	0.229331	cyl-1	31.0236	75.0114	93.6494	45.3998
F07A11.3	II	11599700	11599811	44.9441	24.6781	1.1182	0.00555	0.229331	npp-5	18.7477	0	0	25.7155
C43F9.11	IV	10596915	10600030	13.2417	4.06175	1.70491	0.0056	0.229331	C43F9.11	3.18606	24.2707	1.34726	9.13364
F01G10.10	IV	10246162	10249907	19.1167	7.54395	1.34144	0.0056	0.229331	F01G10.10	7.62312	42.4918	4.78281	14.1782
Y57A10A.19	II	12225358	12227291	77.9114	35.0826	1.15108	0.0056	0.229331	rsr-2	25.1076	58.188	77.6077	36.9438
F47C10.6	V	3843774	3844007	1.94491	0.525197	1.88877	0.0056	0.229331	ugt-32	0.552286	1.42861	2.82718	1.15066
T22B11.2	IV	4688267	4691934	13.6821	5.09667	1.42467	0.00565	0.230727	bus-4	5.45428	30.5662	2.78268	9.16209
C54C6.7	III	3546338	3546419	7.596	2.04793	1.89108	0.0057	0.231465	C54C6.7	1.83052	8.60149	8.40783	3.19763
T20D4.7	V	3408870	3409519	20.7875	7.33045	1.50374	0.0057	0.231465	T20D4.7	6.18951	11.8086	31.3185	10.4154
F40F12.4	III	9893155	9898426	1.24186	0.264909	2.22893	0.0058	0.234868	mam-7	0.284542	2.40017	0.626443	0.468605
C29E6.4	IV	11878549	11883407	0.713224	0.104512	2.77068	0.00585	0.234979	cutl-27	0.185736	1.54209	0.17809	0.293185
T06A4.1	I	770892	776368	8.19321	3.34908	1.29066	0.00585	0.234979	T06A4.1	2.94324	11.3046	7.91955	3.91918
C01B10.5	IV	6646034	6646939	9.95394	3.05801	1.70267	0.0059	0.234979	hil-7	2.44139	13.2548	8.34165	4.36509
EEED8.5	II	5399539	5406005	57.1616	25.9671	1.13836	0.0059	0.234979	mog-5	19.1469	46.0394	59.2209	26.9345
ZK666.14	II	10494807	10495671	3.83962	0.826237	2.21633	0.0059	0.234979	ZK666.14	0.726113	5.77483	1.85205	1.22092
Y45G12C.2	V	2561690	2564708	121.188	54.3197	1.15769	0.00595	0.235033	gst-10	64.1678	212.886	130.653	96.0309
K07D8.1	III	7488987	7489075	76.3114	31.3399	1.2839	0.00595	0.235033	mup-4	25.2672	120.679	20.1924	57.2218
T09H2.1	V	3950027	3952068	5.42463	1.93427	1.48774	0.00615	0.240314	cyp-34A4	1.58655	8.29439	1.52883	4.53485
F33D4.6	IV	7717617	7718009	97.1902	26.1033	1.89658	0.00615	0.240314	F33D4.6	21.6808	184.917	34.942	31.3117
Y53F4B.28	II	15158178	15163611	9.73243	3.91895	1.31233	0.00615	0.240314	ptr-20	3.29098	15.5356	2.45712	8.33341
R17.1	III	10848591	10848670	2.93623	0.805517	1.86598	0.0062	0.240969	fbxb-85	0.550591	2.07363	3.42153	0.804198
B0399.2	V	19555744	19555872	8.12698	3.07405	1.40258	0.0062	0.240969	oac-1	2.5469	15.0725	1.45747	5.78538
T07H8.5	V	6953754	6953897	3.32967	0.976597	1.76955	0.00625	0.241617	srg-31	0.667529	1.09638	6.12633	0.455731
Y38E10A.14	II	12623189	12623952	83.1664	35.4192	1.23147	0.00625	0.241617	Y38E10A.14	32.3669	62.6196	149.139	33.6711
F15A2.1	X	13469388	13470471	10.394	3.6816	1.49734	0.00635	0.24483	col-184	2.61488	4.20092	16.464	2.89312
T19B10.2	V	11221300	11222834	661.238	253.587	1.38269	0.00645	0.247369	T19B10.2	211.253	1222.07	309.934	317.923
C26B2.8	IV	8014128	8015637	11.5451	4.18957	1.4624	0.0065	0.248629	C26B2.8	3.72278	23.5439	0.128297	11.297
K01D12.9	V	12404519	12404644	203.548	86.4784	1.23496	0.00655	0.249883	K01D12.9	67.7502	282.417	0.839052	224.369
Y80D3A.2	V	18894900	18894976	38.8878	18.0105	1.11048	0.00665	0.252369	emb-4	15.9366	35.7328	51.0616	24.1463
Y66D12A.8	III	11574219	11578946	60.3533	26.457	1.18979	0.0067	0.252855	Y66D12A.8	26.8802	57.4017	77.6297	29.7314
ZK180.5	IV	4517116	4517169	505.868	186.215	1.44179	0.0067	0.252855	ZK180.5	152.03	905.073	11.717	459.711
Y73B3A.12	X	139167	139640	0.891594	0	33.33	0.00675	0.252855	cal-6	0	0.400411	1.17498	0.294831
Y9C9A.1	IV	4963929	4965369	4.5315	1.37251	1.72318	0.00675	0.252855	Y9C9A.1	1.194	2.10217	8.93037	1.23692
ZC123.1	I	837996	841747	37.0227	11.5761	1.67726	0.00675	0.252855	ZC123.1	9.06682	67.7234	12.1872	14.6959
C09E8.3	II	546705	552026	87.9741	36.9631	1.25099	0.0068	0.254071	mlt-10	28.1408	144.915	27.1327	46.5945
R03A10.5	X	15446730	15450359	9.83571	3.95018	1.31611	0.00685	0.254627	R03A10.5	4.03299	12.9696	8.8553	8.81586
ZK381.2	IV	6965492	6967714	2.98061	0.895862	1.73426	0.00685	0.254627	ZK381.2	0.944031	6.48412	0.956657	1.04766
F11C1.6	X	13008493	13013961	17.6503	8.07023	1.12901	0.0069	0.255829	nhr-25	6.54859	23.4914	10.3178	10.7413
W03A5.3	III	5413782	5413993	7.69668	1.93446	1.99231	0.007	0.258091	grl-22	1.68286	15.3504	1.3449	4.3734
F58B3.1	IV	11622897	11623124	250.928	116.281	1.10966	0.00705	0.258091	lys-4	103.108	308.665	307.024	102.436
C24B5.3	V	9181618	9181719	48.4406	20.2754	1.25649	0.0071	0.259266	ptr-1	15.8018	81.6429	11.9543	27.1282
C24G7.2	I	4103713	4108045	1.75717	0.535394	1.71458	0.0072	0.260946	acd-1	0.495116	2.20919	2.67952	0.571848
ZK470.1	X	4164302	4166138	0.504405	0	33.33	0.0072	0.260946	ZK470.1	0.103151	0.594535	0.574683	0.500014
R53.2	II	9967039	9967132	64.7059	27.7335	1.22227	0.0073	0.263254	R53.2	24.7065	124.58	25.7619	33.7624
F07C4.6	V	7626850	7627780	3.96202	0.896372	2.14407	0.00735	0.264399	F07C4.6	0.765867	1.44903	7.99448	0.787969
T26H5.13	V	15444094	15444354	0.774638	0	33.33	0.0074	0.265539	linc-123	0.128043	0.518176	1.23017	0.23301
T23F4.3	II	1171945	1172109	3.74275	1.20078	1.64013	0.0075	0.265952	T23F4.3	0.984913	3.13556	5.22858	1.43826
C30H6.2	IV	17366330	17366491	2.40686	0.667436	1.85045	0.0075	0.265952	tag-141	0.646297	4.99692	0.714866	1.60786
C02E7.10	V	4932826	4933027	1.80845	0.333682	2.43821	0.00755	0.265952	C02E7.10	0.22808	1.64925	2.47052	0.303265
C26B9.3	X	5338273	5340181	69.5531	29.9148	1.21726	0.00755	0.265952	C26B9.3	27.5576	137.01	30.6617	33.9233
R05G9R.1	II	6513909	6514011	1.80316	0.58655	1.62021	0.00755	0.265952	R05G9R.1	0.472515	3.13795	0.401582	1.17531
Y41D4A.1	IV	1772144	1774695	2.72717	0.272804	3.32147	0.00755	0.265952	Y41D4A.1	0.435093	3.16845	2.74297	1.20299
C04H5.6	II	14560274	14561596	33.9587	15.543	1.12751	0.0076	0.265952	mog-4	11.8793	25.9148	39.8333	15.1585
B0280.5	III	7103920	7103992	14.7251	6.56199	1.16608	0.00765	0.265952	cpg-2	5.21193	11.4192	17.7516	9.33573
F20C5.6	IV	8772651	8773195	13.8865	5.56813	1.31842	0.00765	0.265952	F20C5.6	4.25575	9.60581	18.0393	4.72367
F47G4.2	I	14082522	14082536	24.474	7.3996	1.72573	0.00765	0.265952	gadr-6	5.69472	13.2302	41.9503	6.61531
Y22F5A.6	V	10283096	10283448	18.2778	7.4953	1.28603	0.00765	0.265952	lys-3	5.89947	18.9269	11.7562	14.485
ZK484.6	I	6090754	6090895	2.85765	0.446444	2.67828	0.00765	0.265952	ZK484.6	0.457734	2.32196	3.92109	1.56979
K12D12.2	II	11874559	11874714	54.8608	25.0246	1.13243	0.0077	0.26705	npp-3	19.4748	42.3828	65.285	27.2275
C33H5.7	IV	7774448	7775950	33.0299	14.6441	1.17345	0.00775	0.268143	swd-2.2	11.7997	33.3394	34.5343	17.3471
F47B10.9	X	10913918	10914075	13.7179	5.30547	1.37051	0.0078	0.26923	F47B10.9	5.23534	19.5617	10.6781	8.21332
K08H10.6	V	9995708	9995883	2.9823	0.899068	1.72992	0.00785	0.270312	K08H10.6	0.829624	6.13211	0.144192	1.80018
F19D8.2	X	13834427	13836522	2.68999	0.330339	3.02558	0.0079	0.270748	F19D8.2	0.225795	1.73351	4.04601	0.956521
F49C5.12	II	12560215	12560264	2.98411	0.371671	3.00521	0.0079	0.270748	F49C5.12	0.338729	2.1601	3.35487	1.43553
C06E4.3	IV	7260885	7262028	4.39868	1.28956	1.77019	0.00795	0.271179	C06E4.3	1.04672	2.03776	6.76102	1.43232
C25A1.3	I	10161753	10161885	27.95	12.7727	1.12979	0.00795	0.271179	tag-72	10.798	27.7184	29.1321	15.7452
F48A11.1	II	203459	211924	8.39466	3.73556	1.16815	0.00805	0.273946	chs-2	2.92907	13.3708	2.49302	5.28806
C31B8.4	V	2896637	2898417	1.91063	0.409985	2.22041	0.0081	0.275002	C31B8.4	0.480403	0.822232	5.49164	0.532171
Y48G10A.4	I	13464762	13470351	13.381	6.20324	1.10909	0.00815	0.276053	Y48G10A.4	4.89773	10.1315	16.7881	6.33399
W09C5.4	I	13639012	13639311	75.7755	30.6027	1.30807	0.00825	0.27637	ins-33	25.3215	34.6368	120.684	24.6229
C24G7.1	I	4109407	4112385	0.839011	0.103506	3.01897	0.0083	0.27637	C24G7.1	0.165081	0.522804	2.3753	0.113914
R01E6.2	X	13566430	13566511	8.85341	2.87387	1.62324	0.0083	0.27637	R01E6.2	3.20119	22.859	1.49449	6.07534
W06D12.1	V	17739805	17739899	1.26973	0.265155	2.25961	0.00835	0.27637	cutl-4	0.241653	2.90246	0.047244	0.93044
K09D9.2	V	4022619	4024473	2.86371	0.980632	1.5461	0.00835	0.27637	cyp-35A3	0.726144	3.46314	2.94689	0.944516
F47E1.1	X	9073800	9077724	5.23107	1.45778	1.84334	0.00835	0.27637	F47E1.1	1.55	4.55928	6.00292	2.95271
F53A2.9	III	13359120	13359277	12.9452	5.14815	1.33029	0.00835	0.27637	F53A2.9	4.32824	9.32161	21.0492	5.05934
C30F8.3	I	5096601	5100494	3.71824	1.02608	1.85747	0.0084	0.277391	C30F8.3	1.49622	9.95132	0.256972	2.64236
Y38C1BA.3	IV	1820172	1820253	161.507	68.5161	1.23708	0.0085	0.279421	col-109	52.6079	271.77	3.52426	144.533
ZC196.2	V	8739437	8742259	1.44508	0.196779	2.8765	0.0085	0.279421	ZC196.2	0.179338	0.405237	2.53329	0.514829
F49E12.10	II	8391088	8392281	30.5558	13.4634	1.18241	0.00865	0.283708	F49E12.10	11.7217	28.4365	33.0548	23.0457
C06A8.2	II	7781112	7781254	24.2133	10.9488	1.14503	0.0087	0.284063	C06A8.2	9.88203	24.6188	29.4789	14.5713
R08A2.7	V	14723324	14724743	7.8785	2.65778	1.5677	0.0087	0.284063	R08A2.7	2.19912	7.47712	7.36814	4.63323
Y59A8B.20	V	18001288	18001370	161.271	70.3351	1.19717	0.0088	0.286682	lon-8	57.8239	295.86	36.0961	109.175
B0334.6	II	11510675	11513890	6.41484	2.51647	1.35001	0.00885	0.287665	B0334.6	1.97971	8.4764	4.18993	3.4894
F08B4.1	IV	8692099	8696456	11.4386	5.28635	1.11356	0.0089	0.287998	2001-12-01	4.83135	11.2024	15.3635	6.53602
K02E7.1	II	1083124	1083920	4.89954	0.842681	2.53959	0.0089	0.287998	K02E7.1	0.86399	10.8088	1.95133	2.72924
C23G10.6	III	6194398	6194560	5.235	2.01237	1.37929	0.00895	0.288041	C23G10.6	1.53122	6.88337	1.15568	4.67021
T05C12.10	II	8198803	8204005	86.6012	38.8155	1.15775	0.00895	0.288041	qua-1	28.3072	129.695	46.8153	26.9641
C09E8.2	II	553095	554786	23.3663	9.27031	1.33374	0.009	0.288041	lips-7	7.49738	47.2785	2.24865	16.066
F56H1.1	I	5746725	5754278	8.04002	3.31986	1.27607	0.00905	0.288041	che-14	3.22542	17.1788	3.9804	3.60913
F26D10.11	IV	17275638	17276764	3.5899	0.979747	1.87346	0.00905	0.288041	F26D10.11	1.26495	6.42654	2.58769	1.44092
F41F3.8	V	4648832	4650620	35.834	13.82	1.37457	0.00905	0.288041	F41F3.8	10.6744	64.6933	3.60122	22.8863
F18E3.11	V	7413437	7413840	48.9753	19.2494	1.34724	0.0091	0.288041	F18E3.11	13.1574	65.0019	5.90006	36.6124
F40F12.8	III	9921200	9921892	6.347	2.02741	1.64644	0.0091	0.288041	F40F12.8	1.54882	4.56066	8.84197	2.66467
F56D3.1	II	4142816	4149679	68.5636	30.5622	1.1657	0.00925	0.290883	F56D3.1	26.9975	116.552	39.9128	32.7703
T28A11.16	V	3259057	3259215	29.481	11.8127	1.31945	0.00925	0.290883	T28A11.16	9.24054	20.969	41.0658	9.45298
C32H11.1	IV	12914670	12914969	2.18893	0.69497	1.6552	0.0093	0.291192	C32H11.1	0.548923	1.43052	3.41863	1.37723
Y39B6A.49	V	19094939	19096900	6.8463	2.7269	1.32806	0.0094	0.293058	Y39B6A.49	2.75858	5.87693	10.4231	4.33684
D1007.13	I	4566495	4568389	18.3471	6.3537	1.52989	0.0095	0.29554	D1007.13	4.90567	29.4798	2.57092	10.7958
B0507.1	V	8776656	8779293	9.91336	4.02899	1.29896	0.0096	0.296109	B0507.1	3.05513	14.3254	4.23114	5.70235
Y65B4BR.6	I	574930	575119	308.706	129.85	1.24939	0.0096	0.296109	grl-16	108.551	520.858	5.45006	304.769
H27M09.2	I	6850407	6851321	254.45	123.432	1.04367	0.0097	0.298558	rpb-5	99.7142	267.163	239.818	147.225
ZK652.5	III	7839594	7841491	1.18439	0.195884	2.59607	0.00975	0.299461	ceh-23	0.267784	1.10016	1.29585	0.647347
F38B6.7	X	6698208	6698337	2.68229	0.793273	1.75758	0.0099	0.303426	F38B6.7	0.852063	6.1725	0.986362	1.70435
F10G2.2	V	7331216	7331779	9.48298	3.24867	1.54549	0.01	0.3052	F10G2.2	2.55363	6.76689	11.7751	3.56678

## Sheet: N2 66 genes down
Gene ID	Chr	Start	End	PRPs RNAi FPKM	Control gfp RNAi FPKM	Log2 fold change	Test statistic (Gene differential expression)	P-value (Gene differential expression)	Q-value (Gene differential expression)	Gene Description	GFPRNAi L3 FPKM	prp6RNAi L3 FPKM	prp8RNAi L3 FPKM	prp31RNAi L3 FPKM
C01G5.2	IV	6529443	6529802	4.57221	20.9886	-2.19864	-4.36	5e-05	0.0268463	prg-2	19.833	2.83472	2.69158	8.63982
D1086.3	V	14092863	14093986	12.5903	53.6464	-2.09117	-5.04	0.0001	0.0402694	D1086.3	45.0866	10.0152	9.30075	13.6164
C55B7.1	I	6514021	6517507	2.16147	7.96745	-1.88211	-3.59	0.0004	0.0707171	glh-2	10.4149	2.55574	2.36334	5.85907
K02G10.7	X	4704867	4704968	47.706	133.051	-1.47974	-2.98	0.00045	0.0749845	aqp-8	117.997	21.1838	46.4873	65.8084
F18E9.3	X	8586166	8590365	23.0346	77.8962	-1.75775	-3.56	0.0007	0.0890167	F18E9.3	70.354	9.206	9.88465	46.1423
W05B2.5	III	10985504	10985608	20.2155	63.035	-1.64069	-3.58	0.00085	0.0962691	col-93	730.181	255.919	81.2888	868.083
R03H4.6	V	9024687	9024806	1.09484	4.08005	-1.89786	-3.18	0.00145	0.130563	bus-1	3.33053	1.10907	1.29912	0.47238
ZC21.3	III	8525078	8528614	29.1979	91.2107	-1.64334	-2.95	0.0016	0.136442	ZC21.3	73.8624	12.8531	12.376	48.3741
F08F3.3	V	5428160	5430431	47.321	114.617	-1.27626	-2.61	0.0017	0.139237	rhr-1	95.4868	22.5373	43.4599	56.8128
R166.1	II	10530409	10533506	2.65299	8.04251	-1.60002	-3.07	0.0019	0.14497	mab-10	6.38075	1.75311	3.16236	1.68931
Y75B8A.3	III	12106340	12106535	20.8063	58.7435	-1.49741	-3.09	0.002	0.147178	Y75B8A.3	45.4962	11.3558	8.31582	30.6067
C09F12.2	X	11053944	11056970	1.32836	4.34764	-1.71058	-3.05	0.00205	0.148594	C09F12.2	3.6883	0.865159	1.06076	1.80683
Y53C12B.7	II	9752250	9752324	7.84414	25.3774	-1.69386	-4.07	0.0026	0.171328	Y53C12B.7	22.0669	4.24963	8.92684	9.64849
C49G7.12	V	4038821	4039934	11.2361	30.365	-1.43427	-3.26	0.0026	0.171328	C49G7.12	23.762	5.38009	9.41181	12.5776
E03H4.8	I	12426734	12426766	23.0173	57.845	-1.32948	-3.01	0.00265	0.172274	E03H4.8	48.6282	12.0226	17.0309	30.8735
F22F7.2	V	2122827	2127360	3.64136	11.0395	-1.60012	-2.75	0.00275	0.173334	F22F7.2	9.29639	2.26923	2.0517	5.64891
F31F4.15	V	676703	676753	10.2818	27.1356	-1.4001	-3.13	0.003	0.181971	fbxa-72	22.0961	5.8302	9.32454	10.1354
T05F1.2	I	9622548	9624725	2.05842	6.06562	-1.55912	-2.91	0.00315	0.184135	T05F1.2	4.36772	1.31061	1.34979	2.34254
C47B2.8	I	12971614	12972259	122.82	310.93	-1.34005	-3.62	0.00315	0.184135	prx-11	212.528	84.0891	47.6867	134.843
R09E12.9	V	777571	778235	18.7772	53.1538	-1.50119	-4.06	0.00315	0.184135	R09E12.9	42.284	12.0567	10.3155	25.2687
K06A5.7	I	6471764	6471951	7.61519	18.5925	-1.28777	-2.54	0.0032	0.186307	cdc-25.1	14.6075	5.14112	5.07896	8.61419
Y53F4B.23	II	15124517	15126350	3.13377	14.128	-2.17258	-3.79	0.00325	0.18771	Y53F4B.23	13.1385	0.75626	0.932629	7.94775
ZC116.1	V	12609826	12610858	66.7102	175.256	-1.39349	-3.23	0.00325	0.18771	ZC116.1	128.814	22.4858	34.321	94.997
F56D1.7	II	5456305	5458616	7.59139	19.9304	-1.39253	-2.92	0.0034	0.191789	daz-1	16.4459	4.5475	4.60619	10.1484
F32G8.4	V	10557974	10560792	40.5726	93.7625	-1.2085	-2.46	0.0035	0.193293	best-14	78.9941	15.9699	53.1387	40.2056
C14C6.4	V	539202	541486	0.325265	3.09323	-3.24943	-4.35	0.00355	0.193293	nhr-155	2.98082	0.142349	0.081403	0.879403
C32C4.7	V	10653797	10654265	0.276553	1.72524	-2.64117	-3.66	0.0037	0.196479	ugt-35	1.45524	0.061805	0.20577	0.424211
C01G10.4	V	15089755	15090021	31.9841	113.583	-1.82831	-10	0.0037	0.196479	C01G10.4	80.7925	6.31745	22.9316	42.2306
ZK228.4	V	18462804	18465320	18.9174	46.2297	-1.28911	-2.46	0.0039	0.200127	ZK228.4	47.2952	11.4939	17.985	30.5192
K07C5.7	V	10358551	10361576	6.97792	17.8857	-1.35794	-2.86	0.0042	0.202007	ttll-15	15.9582	5.1146	4.46271	9.52267
ZK1248.6	II	5809924	5810342	0	0.895141	-33.33		0.00425	0.202007	msp-64	0.764815	0	0	0
K07F5.5	IV	9844029	9844337	0	1.55845	-33.33		0.00425	0.202007	nspd-2	1.06524	0	0	0
T06A10.2	IV	16895739	16895961	0	17.4016	-33.33		0.00425	0.202007	T06A10.2	11.8945	0	0	3.85209
T08D2.6	X	181783	181874	0	4.22547	-33.33		0.00425	0.202007	T08D2.6	2.88821	0	0.629582	0.448699
C06A5.6	I	5985706	5985869	2.42928	6.44334	-1.40728	-2.64	0.0043	0.202772	C06A5.6	5.33138	1.61008	1.76566	2.74465
C08C3.4	III	7795184	7795409	5.86053	15.6305	-1.41526	-2.51	0.00435	0.202772	cyk-7	14.583	4.31597	3.98968	8.35586
F17E9.10	IV	8334298	8334765	5.45203	19.3578	-1.82805	-4.01	0.00435	0.202772	his-32	13.2315	2.3291	1.02866	8.26011
K09H9.8	I	3140445	3140601	19.6619	49.8215	-1.34136	-3.24	0.0044	0.203143	K09H9.8	44.3369	8.3668	14.7953	32.0262
Y102A5C.6	V	16929167	16930063	2.49308	7.97474	-1.67751	-3.15	0.0044	0.203143	Y102A5C.6	6.09223	1.29578	1.5129	3.26328
T01B11.5	IV	8463562	8463814	9.58021	23.6319	-1.30261	-2.77	0.00445	0.204151	str-176	20.0771	3.02362	11.9919	11.199
F14F9.4	V	5132741	5137100	39.6219	87.2919	-1.13955	-2.34	0.0046	0.209705	F14F9.4	66.891	25.7689	25.0968	44.7373
F54D5.9	II	11544624	11544831	7.09012	17.1521	-1.27451	-2.67	0.00535	0.226119	F54D5.9	13.5704	5.71692	3.54229	9.10658
C10C5.5	IV	9381421	9383115	2.28152	6.93928	-1.60479	-2.9	0.00535	0.226119	C10C5.5	7.56815	0.88806	2.26627	5.28822
T23D8.7	I	9989800	9994015	1.70413	4.41076	-1.37199	-2.41	0.0056	0.229331	hpo-24	3.42296	1.09118	0.932881	2.07376
K06A4.5	V	9505689	9507114	13.3496	33.8425	-1.34204	-2.89	0.0059	0.234979	haao-1	35.6139	9.46519	6.51019	27.9645
C06B3.7	V	13909748	13911524	33.4324	75.4268	-1.17383	-2.86	0.00595	0.235033	C06B3.7	59.9657	24.9727	19.3247	38.8161
Y71F9B.7	I	2757893	2758211	7.59018	17.2649	-1.18564	-2.33	0.0061	0.240304	plk-2	13.6028	3.5924	7.41496	6.76559
K08D12.6	IV	1720790	1723069	22.9821	53.4967	-1.21894	-2.62	0.00645	0.247369	K08D12.6	70.1289	12.4791	28.2217	52.018
C34D4.10	IV	7121279	7121413	1.47942	4.5621	-1.62466	-2.91	0.00665	0.252369	C34D4.10	4.1718	1.38487	1.28888	1.80797
R06C7.1	I	7235384	7238794	15.7193	34.5629	-1.13669	-2.44	0.007	0.258091	wago-1	27.9576	10.2796	8.53884	20.6696
F58H7.2	IV	945538	945651	6.13027	14.6818	-1.26	-2.55	0.00705	0.258091	faah-3	11.9052	2.29312	4.89725	8.5888
C08F8.3	IV	11155029	11156695	3.23101	8.38813	-1.37636	-2.69	0.00705	0.258091	C08F8.3	6.95784	2.30526	2.05486	3.84156
C35A5.3	V	10501243	10501397	5.13386	13.1277	-1.35449	-2.33	0.0072	0.260946	C35A5.3	11.9049	4.64517	1.22725	8.96069
T27D1.1	III	3699546	3699642	3.80958	10.3738	-1.44525	-2.93	0.00725	0.262103	cyn-9	8.65628	3.17816	2.96383	4.28562
K08D12.7	IV	1723979	1724143	0	0.798579	-33.33		0.00745	0.265952	K08D12.7	0.545849	0	0	0
ZK228.3	V	18461075	18461231	7.64278	19.4252	-1.34576	-2.77	0.0082	0.27637	ZK228.3	18.8022	2.67043	6.3053	13.4686
ZC404.8	V	6784853	6784922	5.50748	12.7805	-1.21448	-2.21	0.0083	0.27637	spn-4	9.42777	4.14339	3.11038	5.51963
F41F3.4	V	4653878	4653986	0.669914	2.56278	-1.93566	-3.02	0.00835	0.27637	col-139	1.98222	0.852294	0.144749	0.599022
Y82E9BL.10	III	1324412	1324633	11.6571	27.1543	-1.21997	-2.6	0.009	0.288041	fbxa-14	27.887	8.96961	6.50241	21.8184
W04G3.1	X	11059994	11061868	63.0212	139.278	-1.14406	-2.19	0.0091	0.288041	lpr-6	114.975	46.5381	105.687	15.865
C27B7.5	IV	8901644	8903183	8.84735	20.6805	-1.22496	-2.61	0.0092	0.290572	C27B7.5	16.4177	5.51847	4.78532	11.0076
Y18H1A.6	I	720011	731082	1.26636	3.44547	-1.44401	-2.49	0.0093	0.291192	pif-1	3.24057	1.1136	0.822848	1.74013
F46C5.14	II	8819812	8820154	4.49394	15.2331	-1.76116	-4.62	0.00935	0.292127	linc-72	10.4122	3.40649	1.2403	5.02018
C10H11.6	I	4721178	4723960	28.231	58.7635	-1.05764	-2.18	0.0096	0.296109	ugt-26	55.6762	19.7226	22.7112	37.2142
C16A11.5	II	4223309	4226330	1.0938	3.03971	-1.47459	-2.53	0.0096	0.296109	C16A11.5	2.71376	0.992145	0.612133	1.33118
E01A2.10	I	4147034	4147136	15.5622	34.3263	-1.14127	-2.6	0.01	0.3052	poml-3	45.8048	20.926	14.3268	33.9341

## Sheet: smg-1 mut 346 genes up
Gene ID	Chr	Start	End	smg-1(-) PRPs RNAi FPKM	control smg-1(-) gfp RNAi FPKM	Log2 fold change	Test statistic (Gene differential expression)	P-value (Gene differential expression)	Q-value (Gene differential expression)	Gene Description	smg1-gfpRNAi-L3 FPKM	smg1-prp8RNAi-L3 FPKM	smg1-prp31RNAi-L3 FPKM	smg1-prp6RNAi-L3 FPKM
Y48G1C.1	I	93031	94881	18.3609	3.98727	2.20316	5.82	5e-05	0.00821359	Y48G1C.1	3.30262	26.5175	6.71747	11.4836
Y65B4A.1	I	654096	658706	36.4227	12.0074	1.60092	4.85	5e-05	0.00821359	Y65B4A.1	10.123	42.2809	20.9659	28.5058
K09H9.6	I	3147370	3147859	88.7562	36.1368	1.29638	3.66	5e-05	0.00821359	lpd-6	27.5997	80.3708	57.2927	73.445
E01A2.4	I	4132121	4132292	74.8169	28.7767	1.37846	3.78	5e-05	0.00821359	let-504	21.3862	75.7667	32.6757	57.7697
C10H11.10	I	4760783	4761323	12.792	3.10469	2.04272	5.21	5e-05	0.00821359	kca-1	3.77871	27.698	6.6136	12.7291
Y110A7A.8	I	5127828	5129612	108.979	43.3639	1.32948	3.95	5e-05	0.00821359	prp-31	31.4118	121.882	23.9554	95.2852
F27D4.3	I	7722084	7723116	51.7347	15.7591	1.71495	5.51	5e-05	0.00821359	F27D4.3	23.7055	135.052	47.418	100.38
C17E4.5	I	9421900	9421994	112.72	46.4075	1.28032	3.55	5e-05	0.00821359	pabp-2	37.3354	124.123	71.0327	87.3451
ZK1225.7	I	13224430	13225473	17.7065	1.2529	3.82094	8.8	5e-05	0.00821359	ZK1225.7	2.43477	50.3117	7.66876	23.7258
Y48G10A.4	I	13464762	13470351	12.6104	4.86406	1.37439	3.73	5e-05	0.00821359	Y48G10A.4	4.0057	16.4629	6.75029	9.80553
Y48G10A.2	I	13487365	13487404	16.5016	6.56862	1.32895	3.28	5e-05	0.00821359	Y48G10A.2	6.15506	23.6977	10.0465	14.118
F47G4.2	I	14082522	14082536	22.8497	6.99074	1.70866	4.06	5e-05	0.00821359	gadr-6	5.62951	36.7227	7.65564	13.3308
F31C3.11	I	15064301	15064453	39334.1	5838.32	2.75215	87.2	5e-05	0.00821359	rrn-2.1	4034.03	34626.6	12191.2	36295.1
F31C3.8	I	15069280	15071033	3.41075	0.244769	3.8006	6.06	5e-05	0.00821359	rrn-1.2	1.86037	58.5981	7.58911	56.5588
C08E3.6	II	1610519	1610715	40.2992	0.436517	6.52857	12.8	5e-05	0.00821359	fbxa-163	0.41762	75.4742	3.52769	36.6604
F19B10.13	II	3662258	3662986	77.6176	3.77427	4.36211	11.9	5e-05	0.00821359	F19B10.13	2.60786	98.9538	9.14381	55.875
R03H10.6	II	4173290	4173875	13.0535	1.77281	2.88033	6.77	5e-05	0.00821359	R03H10.6	1.32464	19.9627	2.73972	7.09984
EEED8.5	II	5399539	5406005	47.1272	19.1264	1.301	3.6	5e-05	0.00821359	mog-5	14.5006	51.0001	22.8446	34.9184
ZK1290.5	II	7529646	7530991	22.4624	4.80568	2.2247	6.1	5e-05	0.00821359	ZK1290.5	3.92886	28.9894	7.43631	18.9
F49E12.10	II	8391088	8392281	33.5848	12.0582	1.47779	4.41	5e-05	0.00821359	F49E12.10	10.68	59.4318	17.0718	20.0378
R09D1.5	II	9448273	9449726	4.36206	0.895707	2.28391	3.97	5e-05	0.00821359	R09D1.5	0.639525	7.77511	1.1591	0.718515
K12D12.2	II	11874559	11874714	48.8581	20.1486	1.27792	3.6	5e-05	0.00821359	npp-3	16.5257	58.5501	23.8036	37.511
Y57A10A.19	II	12225358	12227291	66.3172	27.8612	1.25113	3.93	5e-05	0.00821359	rsr-2	20.0375	68.6241	31.2318	46.8608
F15D4.5	II	13245430	13247774	14.7911	4.44206	1.73542	4.27	5e-05	0.00821359	F15D4.5	3.91714	18.7321	8.78335	10.4933
F37B1.1	II	13611156	13611342	246.274	28.9025	3.091	10.1	5e-05	0.00821359	gst-24	22.8678	378.798	56.144	210.823
F37B1.4	II	13612999	13613152	17.0008	3.50944	2.27629	6.13	5e-05	0.00821359	gst-15	2.96373	23.0761	5.843	12.7142
F08G2.5	II	13832853	13833631	710.036	113.378	2.64676	8.53	5e-05	0.00821359	F08G2.5	78.3788	862.921	131.97	505.369
W03H9.4	II	14134992	14142197	42.9857	17.6375	1.28521	3.78	5e-05	0.00821359	cacn-1	13.5918	45.3736	23.0094	32.4524
W03H9.2	II	14143788	14143845	13.3217	2.7516	2.27543	5.9	5e-05	0.00821359	W03H9.2	2.56667	20.5956	5.57273	10.1677
C04H5.6	II	14560274	14561596	30.5269	12.3311	1.30778	3.57	5e-05	0.00821359	mog-4	9.5269	35.6166	14.3277	22.3655
Y53F4B.48	II	15165894	15166028	92.5857	0	33.33		5e-05	0.00821359	Y53F4B.48	0	99.3439	15.3622	80.8682
W05G11.2	III	57702	58698	20.0298	1.73551	3.52872	8.87	5e-05	0.00821359	W05G11.2	1.9415	48.2465	6.41094	20.3509
Y119D3B.21	III	1214952	1215287	3851.8	1082.5	1.83117	8.9	5e-05	0.00821359	Y119D3B.21	747.957	5661.8	912.575	2353.6
Y82E9BL.18	III	1328644	1331066	10.8234	1.58328	2.77316	6.33	5e-05	0.00821359	Y82E9BL.18	1.2955	17.6573	1.34453	7.1342
Y67D2.7	III	1558456	1558529	25.0441	10.0097	1.32308	3.43	5e-05	0.00821359	Y67D2.7	7.86696	28.1373	12.0814	18.7063
F59A2.1	III	3404246	3404479	131.305	53.4706	1.2961	3.38	5e-05	0.00821359	npp-9	41.8177	155.273	61.4128	95.1192
Y37B11A.3	III	5784875	5785134	23.5116	4.0178	2.5489	5.73	5e-05	0.00821359	Y37B11A.3	27.8376	93.6632	37.7119	59.0382
F01F1.7	III	5853192	5853269	76.711	27.7243	1.46829	4.37	5e-05	0.00821359	ddx-23	22.153	86.7254	36.0631	63.0098
ZK328.2	III	6009562	6012839	143.271	60.725	1.23839	3.56	5e-05	0.00821359	eftu-2	45.3937	148.506	66.7059	116.552
T04A6.5	III	7603714	7604326	64.4359	12.9552	2.31433	4.23	5e-05	0.00821359	T04A6.5	11.9243	104.709	29.5842	58.1308
ZK353.4	III	8389361	8389639	0.842525	0	33.33		5e-05	0.00821359	ZK353.4	0	1.24235	0.302533	0.503921
R08D7.1	III	8967612	8967727	37.3946	12.4207	1.59009	4.78	5e-05	0.00821359	R08D7.1	10.0654	43.6884	17.7657	29.6
Y66D12A.10	III	11565834	11568009	59.7749	22.9026	1.38403	4.49	5e-05	0.00821359	Y66D12A.10	19.2749	77.5934	28.1414	46.8243
F53H1.1	IV	1309389	1309644	49.6051	16.5041	1.58767	4.61	5e-05	0.00821359	F53H1.1	14.7749	66.5173	27.7847	42.5055
F58E2.3	IV	3467428	3469828	5.13772	1.55303	1.72604	3.48	5e-05	0.00821359	F58E2.3	1.16045	9.82641	1.34715	1.18767
C50F7.5	IV	7726718	7727951	86.0092	24.6783	1.80125	5.45	5e-05	0.00821359	C50F7.5	28.9274	215.972	39.2815	81.8272
B0218.8	IV	8168659	8168774	41.9065	4.68532	3.16096	8.3	5e-05	0.00821359	clec-52	4.24717	77.7019	6.1362	29.8565
F23B2.11	IV	9158630	9159019	58.5109	26.4154	1.14732	3.26	5e-05	0.00821359	pcp-3	22.5525	60.8578	40.9568	54.5693
ZK1251.9	IV	9706549	9706718	16.8308	7.4088	1.18379	3.19	5e-05	0.00821359	dcaf-1	6.5745	19.2937	10.8281	13.4971
T13F2.7	IV	9777462	9777634	32.0281	11.856	1.43372	4.25	5e-05	0.00821359	sna-2	9.50554	34.6255	16.6089	25.2707
R11A8.2	IV	10358085	10360220	52.3852	15.2358	1.7817	5.39	5e-05	0.00821359	R11A8.2	11.9834	60.1083	24.1626	40.4242
K08E7.9	IV	12599058	12599169	8.80111	2.72856	1.68955	4.43	5e-05	0.00821359	pgp-1	2.15819	8.48772	5.39608	7.79035
F55G11.3	IV	12971914	12971974	27.1336	9.43961	1.52328	3.55	5e-05	0.00821359	F55G11.3	10.1575	58.3361	13.7587	16.9881
F49E11.10	IV	13057678	13059092	192.377	61.9654	1.6344	3.99	5e-05	0.00821359	scl-2	48.975	317.536	58.6413	83.3664
Y105C5A.13	IV	15641215	15645546	7.38362	0.841682	3.13298	4.97	5e-05	0.00821359	Y105C5A.13	2.87109	16.3435	3.1643	9.99533
C30H6.12	IV	17383370	17386783	18.7676	1.17627	3.99595	6.26	5e-05	0.00821359	C30H6.12	1.04497	38.9936	1.74651	6.97145
C14C6.5	V	536628	537418	93.5159	34.9337	1.42059	5.13	5e-05	0.00821359	C14C6.5	29.4676	134.514	38.8077	61.3397
T28A11.19	V	3269353	3269510	17.4936	4.11078	2.08935	5.26	5e-05	0.00821359	T28A11.19	3.12441	32.8608	2.70013	6.00709
F59B1.10	V	3647799	3647954	5.8752	1.54732	1.92486	4.51	5e-05	0.00821359	F59B1.10	1.21305	6.65642	2.86398	4.66707
T05B4.11	V	4122368	4122517	11.939	3.56656	1.74308	4.49	5e-05	0.00821359	phat-5	2.69131	18.1256	5.63468	7.17118
ZC132.4	V	4303099	4304394	8.3034	2.15266	1.94758	4.94	5e-05	0.00821359	ZC132.4	1.52929	9.58924	3.32093	5.62054
C02E7.10	V	4932826	4933027	0.694934	0	33.33		5e-05	0.00821359	C02E7.10	0	0.476565	0.23311	0.887793
F14F9.2	V	5144831	5145781	10.0586	2.66241	1.91763	4.78	5e-05	0.00821359	F14F9.2	1.87568	12.2193	1.97497	9.21472
W06H8.12	V	6227322	6227605	6.73752	0	33.33		5e-05	0.00821359	W06H8.12	0	6.5628	0.460321	7.20261
F10D2.2	V	7157142	7159188	25.6968	6.57635	1.96623	4.81	5e-05	0.00821359	ugt-39	5.73721	46.3768	8.49066	16.5893
K07B1.8	V	9340418	9340934	36.3471	10.111	1.84591	6.27	5e-05	0.00821359	K07B1.8	26.3382	113.783	77.2835	74.492
T06E4.3	V	9638428	9645502	37.8842	8.67597	2.1265	4.98	5e-05	0.00821359	atl-1	6.43003	50.5807	12.7662	23.3289
K07C5.6	V	10355708	10355824	57.5742	22.5044	1.35522	3.72	5e-05	0.00821359	K07C5.6	16.4344	59.0789	27.6186	43.3753
T04H1.4	V	12245594	12251579	22.3649	6.40525	1.80391	4.35	5e-05	0.00821359	rad-50	5.16336	25.0835	13.4846	16.1605
T26H5.9	V	15444910	15445372	394.468	82.6453	2.25491	12	5e-05	0.00821359	T26H5.9	66.4796	566.924	80.6486	324.51
C55A1.6	V	15648069	15648804	19.8645	3.97432	2.32141	7.42	5e-05	0.00821359	C55A1.6	3.86948	43.7128	4.81468	12.5327
Y39B6A.49	V	19094939	19096900	60.506	19.529	1.63146	4.76	5e-05	0.00821359	Y39B6A.49	19.861	104.526	27.5353	47.9144
M02F4.7	X	3031723	3033203	40.5457	11.7053	1.79238	5.16	5e-05	0.00821359	clec-265	10.8884	74.4432	19.6476	23.6856
C09C7.1	X	7925437	7926589	70.0004	23.7453	1.55972	4.74	5e-05	0.00821359	zig-4	18.472	103.607	21.9672	43.017
T21E8.3	X	10864321	10864422	14.6501	0.943377	3.95693	8.48	5e-05	0.00821359	pgp-8	0.788717	27.2162	1.84691	9.38363
C08E3.10	II	1621065	1621261	11.3663	3.24007	1.81067	3.93	0.0001	0.0136153	fbxa-158	2.43629	19.0954	2.65692	8.49698
F19B10.1	II	3683177	3684609	19.1119	5.67243	1.75243	4.92	0.0001	0.0136153	F19B10.1	4.21859	22.8463	7.6127	14.2492
ZK1320.11	II	9667624	9668672	60.8044	26.7711	1.1835	3.15	0.0001	0.0136153	ZK1320.11	22.6642	80.9654	28.2851	48.5805
K09E4.2	II	14132694	14132835	35.1959	16.359	1.10532	3.07	0.0001	0.0136153	K09E4.2	13.2783	39.6387	20.4402	27.0826
F57B9.3	III	6939919	6941736	10.9432	3.93709	1.47484	3.8	0.0001	0.0136153	F57B9.3	4.4144	21.5248	5.72441	8.27332
ZK688.9	III	7882825	7883003	19.9145	8.01068	1.31382	3.85	0.0001	0.0136153	ZK688.9	6.52236	26.7423	12.0127	15.3591
C02A12.4	V	3482355	3482602	330.323	123.304	1.42166	3.59	0.0001	0.0136153	lys-7	100.205	546.929	119.375	181.117
F53B7.3	V	11000609	11000792	71.1637	30.5204	1.22137	3.22	0.0001	0.0136153	F53B7.3	24.9459	79.3661	37.1212	57.3403
C50B6.3	V	13313598	13315814	23.0633	9.69548	1.25022	3.37	0.0001	0.0136153	C50B6.3	7.29926	26.6997	10.4126	16.2213
F44G3.10	V	16139485	16139627	32.8577	13.2119	1.31439	4.17	0.0001	0.0136153	F44G3.10	10.8368	61.3071	14.5798	15.8534
F10A3.1	V	16141033	16141164	10.0617	1.58008	2.67081	6.01	0.0001	0.0136153	F10A3.1	1.27373	25.2248	1.33238	3.72925
F16H6.1	V	18191443	18194262	12.6824	5.10973	1.31152	3.51	0.0001	0.0136153	clec-42	3.95427	17.1824	5.38996	6.96753
Y43F8A.5	V	19390037	19390120	7.18788	2.47657	1.53722	3.43	0.0001	0.0136153	Y43F8A.5	2.41279	10.3947	3.74975	6.93544
Y41G9A.10	X	2946471	2946570	44.771	16.0291	1.48187	4.62	0.0001	0.0136153	Y41G9A.10	11.6008	66.1251	16.7383	19.2254
ZC504.3	X	10419653	10419751	16.4155	4.8606	1.75585	4.07	0.0001	0.0136153	ZC504.3	3.80182	19.7902	6.76669	12.9745
C12C8.1	I	9322407	9322511	12.5534	4.66725	1.42743	3.5	0.00015	0.0187351	hsp-70	3.39669	9.56915	8.06329	10.4592
W09G10.6	II	3516008	3518898	2.999	0.716856	2.06473	4.19	0.00015	0.0187351	clec-125	0.546118	4.81697	0.745151	1.33118
Y71D11A.2	III	1143062	1145220	55.8438	24.8631	1.16739	3.08	0.00015	0.0187351	smr-1	22.128	62.1246	29.9614	58.3227
Y82E9BR.13	III	1391792	1391852	14.1907	4.9406	1.52219	4.09	0.00015	0.0187351	Y82E9BR.13	4.51101	25.247	6.06902	8.69509
Y66D12A.8	III	11574219	11578946	48.8994	22.1512	1.14243	3.02	0.00015	0.0187351	Y66D12A.8	19.2445	60.8393	31.1015	40.0552
K07H8.6	IV	8261145	8266463	0.720285	0.122192	2.55942	2.99	0.00015	0.0187351	vit-6	0.084429	0.715239	0.286307	0.624296
C01F6.5	IV	9108931	9109751	138.586	62.1659	1.15659	4	0.00015	0.0187351	aly-1	46.3854	158.227	56.3603	104.064
T05H4.14	V	6433295	6433498	50.4116	22.0668	1.19188	3.27	0.00015	0.0187351	gad-1	16.8014	54.0976	21.7386	39.9717
T14B1.1	X	9667267	9668755	46.7768	18.986	1.30086	3.37	0.00015	0.0187351	T14B1.1	14.8279	68.2348	24.0245	25.6423
ZK484.6	I	6090754	6090895	8.59813	2.01058	2.09641	5.06	0.0002	0.023431	ZK484.6	1.62875	13.2428	3.50297	6.60302
ZK84.1	II	6020653	6023349	77.0067	23.1102	1.73645	3.92	0.0002	0.023431	ZK84.1	17.8431	32.0305	18.4127	132.387
K02D7.3	IV	326634	326671	13.0232	3.49372	1.89825	4.54	0.0002	0.023431	col-101	2.54963	26.2798	3.35865	3.15177
B0240.4	V	11733394	11733479	56.5869	25.1942	1.16738	3.19	0.0002	0.023431	npp-22	21.7231	68.1597	25.4373	50.8211
C08E3.4	II	1606832	1607584	3.87139	0.860737	2.16921	4.27	0.00025	0.0277813	fbxa-161	0.594732	7.84279	0.803412	1.68463
Y46G5A.4	II	12736437	12736875	71.0349	30.3485	1.2269	3.32	0.00025	0.0277812	snrp-200	24.6339	82.3467	38.663	58.4982
Y46G5A.5	II	12738193	12738334	83.5715	37.4812	1.15684	3.47	0.00025	0.0277812	pisy-1	31.2772	102.691	44.2943	72.9386
K08D8.4	IV	12909696	12909998	52.0778	23.1168	1.17172	3.25	0.00025	0.0277812	K08D8.4	20.0312	38.4857	48.1149	49.6774
Y105C5B.15	IV	15951909	15954841	33.6896	15.5858	1.11208	2.99	0.00025	0.0277812	Y105C5B.15	12.8507	42.406	19.6506	26.3457
ZK1055.7	V	6605233	6605377	117.934	53.9368	1.12864	3.1	0.00025	0.0277812	ZK1055.7	41.3142	132.753	54.8936	89.7961
Y6E2A.4	V	15715582	15715644	10.3595	3.92922	1.39863	3.49	0.00025	0.0277812	Y6E2A.4	3.5923	19.6246	3.08494	5.47627
F07A11.3	II	11599700	11599811	43.9346	20.1935	1.12147	3.11	0.0003	0.0321553	npp-5	15.7332	46.338	22.248	35.8989
W01A11.7	V	6505245	6505500	24.6273	9.82908	1.32513	3.05	0.0003	0.0321553	W01A11.7	8.74353	35.2168	12.7547	14.4655
Y69H2.9	V	18701556	18706098	5.62139	2.0845	1.43123	3.45	0.0003	0.0321553	Y69H2.9	1.80875	6.13403	2.68896	6.66789
Y65B4A.6	I	636234	636350	88.6051	41.4593	1.09569	3.5	0.00035	0.0359833	Y65B4A.6	30.4861	90.1523	42.6984	69.6218
B0284.1	III	4376503	4378883	2.80997	0.479333	2.55146	4.84	0.00035	0.0359833	B0284.1	0.434697	3.56462	0.87226	2.66
Y80D4G.1	III	7600558	7604093	24.2218	6.67848	1.85871	3.53	0.00035	0.0359833	Y80D4G.1	7.95982	71.2356	16.3522	41.0935
K03D3.2	IV	16328360	16328615	20.8361	5.66044	1.8801	5.32	0.00035	0.0359833	K03D3.2	4.45686	44.2277	3.64699	2.23234
C08E3.13	II	1633817	1633850	336.308	150.691	1.15819	6.11	0.0004	0.0387513	C08E3.13	226.442	814.71	192.682	475.405
T26G10.7	III	9409628	9409751	6.0535	1.47685	2.03525	4.75	0.0004	0.0387513	T26G10.7	5.42443	22.1734	6.7205	17.5953
T07G12.8	IV	10553416	10554168	39.1455	10.2517	1.93299	4.25	0.0004	0.0387513	T07G12.8	9.12675	62.1156	16.8782	33.9166
Y22F5A.4	V	10277827	10279127	1404.8	573.76	1.29184	3.17	0.0004	0.0387513	lys-1	480.6	1909.2	671.589	999.55
D1054.14	V	10805905	10806040	55.4533	24.3224	1.18899	3.2	0.0004	0.0387513	prp-38	18.7469	64.552	26.2529	37.5009
ZK863.3	V	12181291	12181412	69.8436	34.2952	1.02612	2.86	0.0004	0.0387513	elpc-3	27.2157	75.8565	37.4261	58.7999
D1054.15	V	10807832	10807912	116.953	54.2995	1.10692	3.04	0.00045	0.0433175	plrg-1	41.5791	134.791	52.2203	93.7026
C17H1.7	I	13138312	13138521	5.47902	1.82281	1.58775	3.47	0.0005	0.045797	C17H1.7	1.40402	9.85408	1.47427	1.7606
T17A3.10	III	156612	156674	0.537385	0	33.33		0.0005	0.045797	T17A3.10	0	1.34525	0.031967	0.196687
F08B4.3	IV	8666197	8667084	229.968	111.496	1.04444	2.78	0.0005	0.045797	F08B4.3	105.323	266.316	138.709	239.552
ZK105.1	V	7713990	7714700	49.3095	10.3556	2.25145	3.4	0.0005	0.045797	ZK105.1	8.03593	90.0166	10.6455	18.9142
Y73B6BL.269	IV	6354011	6357243	41.3111	15.3613	1.42723	3.05	0.00055	0.0491843	linc-29	17.3777	54.6414	22.2815	34.0264
F19F10.9	V	7575518	7575674	85.224	40.7705	1.06374	3.17	0.00055	0.0491843	F19F10.9	34.2886	94.5507	52.5748	71.506
Y23H5B.10	I	2514168	2514311	33.3925	0	33.33		0.00065	0.056134	Y23H5B.10	0	23.9066	12.636	34.0186
C50F2.3	I	3877061	3880755	85.9429	34.9636	1.02637	3.61	0.00065	0.056134	C50F2.3	26.247	79.7669	0	52.9396
W02A11.4	I	12741605	12748729	30.3898	14.8088	1.03713	3.11	0.00065	0.056134	uba-2	12.6382	37.3293	16.948	27.1285
Y50D4B.4	V	1092679	1095116	3.77976	1.22341	1.62738	3.57	0.00065	0.056134	Y50D4B.4	2.1097	10.1298	4.59074	2.83629
D1009.2	X	8911293	8914252	31.8975	15.7106	1.02171	2.77	0.0007	0.0597689	cyn-8	12.1418	39.676	16.3587	22.9881
F55F8.4	I	5655654	5655859	40.4831	20.1634	1.00558	2.79	0.00075	0.0626229	cir-1	15.1016	42.5027	22.2275	28.3346
C06A8.2	II	7781112	7781254	23.1047	10.8508	1.09039	3.21	0.0008	0.0653535	C06A8.2	9.69615	31.8103	12.7946	20.2373
K08F4.11	IV	10140084	10140243	13.4492	5.41444	1.31263	3.65	0.0008	0.0653535	gst-3	4.84148	18.8651	6.7771	9.0353
F07C4.2	V	7638105	7638622	19.609	6.58641	1.57395	4.72	0.0008	0.0653535	clec-45	5.44485	31.7183	6.44251	7.14967
F53H4.1	X	15865788	15865912	4.36327	1.95308	1.15966	2.92	0.0008	0.0653535	csb-1	1.56918	5.42963	2.18065	3.23891
ZK512.3	III	9119559	9125150	3.78462	1.7785	1.08949	2.66	0.00085	0.0676108	ced-11	1.456	2.76236	1.856	4.87917
F40F12.8	III	9921200	9921892	17.0985	6.52402	1.39003	4.03	0.00085	0.0676108	F40F12.8	5.63476	25.0961	6.83059	12.9483
Y22F5A.5	V	10281019	10281470	512.704	254.64	1.00967	3.34	0.00085	0.0676108	lys-2	200.265	600.81	288.027	332.046
F11A5.3	V	16194939	16195544	0.95415	0	33.33		0.00085	0.0676108	F11A5.3	0	2.01697	0	0
C32B5.8	II	956674	957961	18.0288	8.05798	1.16181	3.32	0.0009	0.0690442	fbxc-6	6.03728	23.589	7.23416	9.89941
ZK328.5	III	6019335	6019552	85.2446	40.1272	1.08703	2.83	0.0009	0.0690442	npp-10	30.0252	91.7101	41.0521	63.775
ZK863.4	V	12184026	12184196	40.5603	19.8166	1.03336	2.84	0.0009	0.0690442	ZK863.4	17.1067	50.8176	21.9983	34.6655
F44G3.2	V	16103894	16106140	545.766	262.378	1.05664	3.26	0.0009	0.0690442	F44G3.2	202.383	545.989	378.59	488.853
B0563.10	X	9167129	9167256	1.37088	0	33.33		0.0009	0.0690442	B0563.10	0	3.19783	0.193009	0
C29F3.2	V	15344406	15344572	22.2257	10.5002	1.08181	3.13	0.00095	0.0725119	wrt-8	9.94956	16.8248	13.6257	38.7624
F08B4.1	IV	8692099	8696456	10.7233	5.14867	1.05847	2.79	0.001	0.0748168	2001-12-01	5.02133	14.6582	6.34254	9.65688
F07C6.6	IV	12792795	12793274	1.20522	0	33.33		0.001	0.0748168	F07C6.6	0	0.362531	0.426062	2.17292
F08G12.2	X	11299585	11299687	56.1901	28.1223	0.9986	3.18	0.001	0.0748168	F08G12.2	21.6053	59.0689	28.0026	44.3818
Y46G5A.43	II	12743824	12744256	22.8753	10.7701	1.08676	3.26	0.00105	0.0777875	Y46G5A.43	9.12658	29.2111	12.8359	17.9958
ZK1010.3	III	12979081	12980164	79.4219	39.2969	1.01512	2.78	0.00105	0.0777875	frg-1	33.2649	96.4959	40.4319	64.4368
B0464.6	III	9465246	9465965	32.4414	26.6905	1.01134	0.798	0.0011	0.0807005	B0464.6	21.0788	0	26.1083	42.0827
Y52D5A.1	IV	5467567	5468781	0.59743	0	33.33		0.00115	0.0839611	Y52D5A.1	0.044334	1.174	0.051515	0.263764
R17.1	III	10848591	10848670	2.60265	0.622771	2.0632	3.95	0.0012	0.0867732	fbxb-85	0.430308	3.01713	1.10536	1.44247
W03G1.5	IV	504982	506600	4.75351	1.82414	1.38177	3.14	0.0013	0.0926741	W03G1.5	2.33595	10.3082	2.91482	2.74905
Y47G6A.17	I	3499602	3499706	0.56277	0.173271	1.69952	3.16	0.00135	0.0931623	Y47G6A.17	0.148456	0.637599	0.405599	0.457214
F33H12.5	II	2585441	2585593	3.20833	0.493884	2.69958	4.77	0.00135	0.0931623	sri-36	0.465344	6.70634	0.398163	1.44717
F19B10.4	II	3660084	3662006	2.79532	0.848334	1.72031	3.47	0.00135	0.0931623	F19B10.4	0.679948	4.35893	1.12426	1.46266
Y49G5A.1	V	5287229	5287360	24.2422	9.27817	1.38561	3.92	0.00135	0.0931623	Y49G5A.1	7.45189	47.8663	6.72719	6.49344
Y38H6C.15	V	20536165	20536224	5.79154	0.743789	2.96098	5.91	0.00135	0.0931623	Y38H6C.15	0.685234	10.0071	1.58621	4.12426
ZK84.7	II	6010844	6011321	30.2731	12.1646	1.31535	4.65	0.0014	0.0948652	ins-20	13.4483	27.0195	15.0745	49.0709
C18H9.5	II	6695273	6695305	6.51264	2.73661	1.25085	3.15	0.0014	0.0948652	C18H9.5	2.83632	5.79607	4.20889	7.59626
Y57A10A.20	II	12228319	12236575	5.92587	2.64534	1.16357	2.71	0.0014	0.0948652	sinh-1	2.06322	6.21259	3.18358	5.06914
F36H5.10	II	1756820	1757761	5.18969	1.47938	1.81066	2.82	0.00145	0.0948652	F36H5.10	1.38226	4.64719	1.60663	6.29746
Y41C4A.11	III	11719900	11723602	44.5134	22.4073	0.99027	2.7	0.00145	0.0948652	Y41C4A.11	17.7587	50.3276	30.1693	29.1555
T04B2.2	IV	10043761	10045703	3.72378	1.30392	1.51391	2.81	0.00145	0.0948652	frk-1	0.979296	6.69194	1.21694	0.972062
F55G11.4	IV	12973636	12975597	92.9558	47.054	0.982228	2.61	0.00145	0.0948652	F55G11.4	49.106	180.007	57.9128	75.4992
B0365.6	V	13137723	13138086	232.461	114.787	1.01802	2.74	0.00145	0.0948652	clec-41	91.4925	273.474	126.792	161.62
Y54E5A.4	I	14706093	14706526	47.8523	24.5131	0.965034	2.64	0.00155	0.100107	npp-4	18.9363	54.2417	21.9627	36.4643
F49E12.9	II	8388125	8389891	30.4057	15.0219	1.01728	2.63	0.00165	0.105663	F49E12.9	14.5263	48.3038	17.591	23.4017
W04A4.5	I	13663485	13674964	19.5673	9.97711	0.971751	2.86	0.0017	0.10705	W04A4.5	7.85995	19.8137	11.405	15.181
C32H11.1	IV	12914670	12914969	1.95963	0.600573	1.70617	2.82	0.0017	0.10705	C32H11.1	0.592814	3.43249	0.994876	1.09206
C08E8.4	V	18371846	18373531	71.5906	36.3402	0.978203	2.66	0.0017	0.10705	C08E8.4	33.7475	109.015	36.6338	67.2981
F10E9.4	III	8308490	8309808	46.1694	24.1916	0.932429	3.08	0.00185	0.114586	F10E9.4	21.5383	42.731	32.6906	42.7278
Y41G9A.5	X	2946667	2949135	51.354	22.9133	1.16429	2.79	0.00185	0.114586	Y41G9A.5	16.5125	82.6704	19.3548	10.7764
K09C4.5	X	3282611	3285723	1.41533	0.409305	1.78989	3.22	0.00185	0.114586	K09C4.5	0.487065	2.96282	0.672307	1.1911
R09B5.6	V	1460367	1461614	10.6058	4.70519	1.17253	2.67	0.002	0.121879	hacd-1	3.67888	9.08964	6.94391	9.47065
Y116A8C.35	IV	17118704	17118760	137.98	72.6257	0.925909	2.82	0.00205	0.123433	uaf-2	60.78	143.309	86.5075	123.351
T07H8.5	V	6953754	6953897	3.45321	1.25759	1.45728	3.08	0.00205	0.123433	srg-31	0.995658	5.61337	1.08154	1.39284
B0464.7	III	9467457	9468066	552.453	278.75	0.986882	3.75	0.00215	0.128431	baf-1	228.012	730.777	219.683	413.224
F42G2.4	II	2412322	2412741	5.62781	2.16696	1.3769	3.22	0.0022	0.1309	fbxa-182	1.76465	9.48989	2.03044	4.32462
F22D6.5	I	7094385	7094748	93.582	41.4478	1.17494	2.47	0.00225	0.131291	prpf-4	33.4717	101.055	51.7409	74.7068
M02H5.3	V	465659	467506	13.5781	6.76736	1.00462	2.86	0.00225	0.131291	nhr-201	6.27003	17.8001	8.64331	10.1694
F21C10.11	V	9123488	9123840	127.482	49.7827	1.35658	2.09	0.00225	0.131291	F21C10.11	36.6315	149.64	34.6521	100.065
Y17G7B.18	II	12107614	12107857	17.383	8.65376	1.00628	2.57	0.0023	0.132671	Y17G7B.18	7.51881	18.8353	9.8057	15.2734
Y67D2.6	III	1554199	1554441	9.53042	4.82604	0.9817	2.54	0.0023	0.132671	Y67D2.6	4.4633	11.2568	7.00826	8.42538
Y53G8AR.2	III	3322970	3331726	14.2846	7.44721	0.939688	2.55	0.0023	0.132671	phf-15	6.34212	16.3077	8.88183	11.3852
F37E3.1	I	6422009	6425798	31.1383	16.6369	0.904306	2.67	0.0024	0.136358	ncbp-1	13.7337	34.7178	18.9168	26.4462
Y18D10A.1	I	12806526	12806581	10.1426	5.32984	0.928264	2.64	0.0024	0.136358	attf-6	4.18114	10.6763	5.88887	7.632
C06E1.1	III	8605832	8606504	15.7691	6.48685	1.28151	3.68	0.0024	0.136358	C06E1.1	4.90047	24.5061	5.11438	8.1996
T19H12.8	V	4884469	4884696	14.8873	7.42419	1.00378	2.85	0.00245	0.13816	nhr-220	5.88842	17.8341	7.14146	12.8011
R07E3.2	X	10336441	10337205	44.3611	21.9671	1.01395	2.52	0.00245	0.13816	R07E3.2	17.6754	20.1079	36.8144	48.8218
Y46G5A.6	II	12746574	12746834	19.9117	10.2301	0.960798	2.84	0.0025	0.139935	Y46G5A.6	10.2277	31.0131	13.4547	18.645
C30G7.1	V	14949777	14952792	36.1832	17.7651	1.02627	3.15	0.0025	0.139935	hil-1	15.2939	57.7796	17.9486	19.5465
F36A4.7	IV	4248068	4258173	41.2715	30.7124	0.877351	1.2	0.0026	0.143933	ama-1	23.9438	61.6016	33.001	40.0649
F58E1.6	II	1670833	1674513	1.03047	0.11527	3.16022	3.75	0.00265	0.145634	nhx-6	0.079646	0.300744	0.253511	2.08651
Y110A7A.7	I	5129721	5131071	103.611	53.701	0.948158	3.05	0.0027	0.146255	Y110A7A.7	45.9191	143.324	43.4259	83.5946
C01G8.1	I	5274173	5274322	2.35824	0.832328	1.50249	2.64	0.0027	0.146255	C01G8.1	0.667119	2.74088	1.42609	2.12784
W01G7.5	II	14063450	14065904	34.9644	18.3839	0.927442	2.79	0.0027	0.146255	lem-2	13.8637	40.8753	14.8416	23.2917
F55F3.2	X	13760290	13763993	17.1858	8.87986	0.952607	2.53	0.0027	0.146255	F55F3.2	8.62769	20.8434	12.629	17.8975
Y69A2AL.2	IV	2482257	2484112	66.5739	33.094	1.00839	3.86	0.00275	0.148431	Y69A2AL.2	31.1527	106.375	31.1387	55.1758
F21H7.14	V	16235303	16235747	0.605045	0	33.33		0.0029	0.15597	srh-98	0	0.278638	0.410789	0.755545
T13B5.5	II	1110805	1110992	2.57829	0.403891	2.67438	4.65	0.003	0.160777	lips-11	0.662794	8.46189	1.70742	3.33296
F40E3.5	I	2657172	2657241	2.53463	0.854968	1.56783	3.05	0.00305	0.162305	F40E3.5	0.640076	3.78722	1.58215	0.988426
F59H6.2	II	2019654	2022441	0.898179	0.108756	3.04591	4.39	0.00305	0.162305	F59H6.2	0.075146	1.28319	0.249852	0.543231
C43E11.1	I	4270646	4273332	38.9054	20.8936	0.896908	2.69	0.0031	0.163241	acin-1	17.8797	47.3891	23.9272	30.2492
C56A3.7	V	13557160	13559922	4.06745	1.37412	1.56561	2.61	0.0031	0.163241	cav-2	1.44329	5.10013	2.67523	3.39521
H27M09.2	I	6850407	6851321	193.519	104.58	0.88786	3.12	0.0032	0.166764	rpb-5	89.6298	205.615	117.131	189.635
K02E7.10	II	1066937	1066998	5.13428	1.97663	1.37712	3.19	0.0032	0.166764	K02E7.10	2.03199	8.37671	2.75758	2.96573
T28A11.4	V	3274054	3274374	2.02721	0	33.33		0.00325	0.168788	T28A11.4	0.227335	4.14428	0.251717	0.761026
B0391.10	V	15585067	15593185	7.27792	2.84437	1.35542	2.76	0.00335	0.171622	B0391.10	2.44575	8.18693	4.43896	5.88874
C08E3.9	II	1618808	1619004	3.13734	1.18683	1.40243	3.01	0.0034	0.173595	fbxa-166	1.03712	3.84303	1.29728	2.42988
C28A5.3	III	4442081	4444239	26.2196	13.6856	0.937983	2.88	0.00345	0.175555	nex-3	12.5905	34.7873	13.8106	26.5756
Y40B1B.7	I	13428385	13428473	172.656	92.7838	0.895951	3.82	0.0035	0.177502	Y40B1B.7	86.9297	246.027	134.267	142.755
ZK678.3	X	15749045	15749206	5.3349	0.65345	3.02931	3.98	0.00355	0.179435	ZK678.3	0.602007	11.9662	1.38585	4.2911
F08F1.5	X	8416752	8416919	1.92457	0.628402	1.61477	2.53	0.00365	0.183875	ced-8	0.59051	2.3425	0.834369	1.96325
F53F10.5	I	3817996	3821503	36.513	20.2842	0.848055	2.38	0.0037	0.185159	npp-11	15.3679	38.2237	19.2014	28.2183
W07E6.4	II	484866	490404	31.4994	17.6274	0.837505	2.32	0.0037	0.185159	prp-21	15.0508	38.2515	19.1751	27.4126
Y46H3A.5	V	1813866	1814116	1.73592	0.53042	1.71049	3.09	0.00375	0.187042	Y46H3A.5	0.390931	2.57125	0.59989	0.908311
C25A1.3	I	10161753	10161885	23.4919	12.4902	0.911361	2.39	0.0038	0.187678	tag-72	10.5396	26.0483	13.5034	19.8839
Y47D3A.6	III	11195043	11195207	22.7044	11.0642	1.03708	2.35	0.0038	0.187678	tra-1	10.4442	33.4618	16.1072	19.3302
Y66D12A.15	III	11526372	11534596	37.8196	20.5406	0.880654	2.37	0.0038	0.187678	Y66D12A.15	16.2935	43.6381	20.6046	25.7476
C07E3.2	II	10344891	10345116	48.6893	27.0749	0.846648	2.39	0.00385	0.188913	pro-2	25.0119	54.7968	38.6758	47.3803
ZC376.6	V	14185785	14192158	10.2312	5.61779	0.864905	2.36	0.0039	0.190747	ZC376.6	4.8491	10.5988	7.38386	8.32332
Y54H5A.3	III	5153099	5153154	85.4438	46.0737	0.891034	2.91	0.004	0.194379	tag-262	34.761	88.4613	41.8419	67.8023
C33D9.5	IV	8779823	8780872	11.3905	5.92281	0.943478	2.36	0.00405	0.194929	C33D9.5	4.43202	13.8596	5.57182	8.04681
C28G1.2	X	8836644	8837860	2.14484	0.638546	1.74801	3.22	0.00405	0.194929	C28G1.2	0.558863	3.49796	0.618054	1.02093
C07A9.2	III	9696123	9696517	65.4305	34.6958	0.915203	2.39	0.0041	0.196086	C07A9.2	31.1317	82.4973	33.929	57.5713
D1046.2	IV	8925988	8926112	13.0415	6.84724	0.92951	2.37	0.0041	0.196086	D1046.2	5.34685	14.6615	7.42578	9.20072
C35D10.9	III	4852325	4855180	10.3816	5.53041	0.908564	2.32	0.00415	0.197852	ced-4	4.5689	12.0532	6.24652	7.83525
W07E6.2	II	484242	484393	42.685	23.4762	0.862529	2.39	0.0042	0.199606	W07E6.2	20.4618	49.6458	29.8944	36.4375
F41E6.11	V	8621271	8621313	45.1831	24.1856	0.901633	2.81	0.0043	0.202448	F41E6.11	17.23	12.3218	38.6904	47.46
K02E2.4	V	20375540	20376299	46.0397	22.4742	1.03461	4.28	0.0043	0.202448	ins-35	17.7639	48.8894	24.8737	33.3502
C26E6.9	III	4930072	4930206	16.7935	8.45708	0.989671	2.41	0.00435	0.203534	set-2	6.76821	20.1822	8.80732	11.4547
W08D2.7	IV	9825698	9830618	29.8851	16.6623	0.842839	2.49	0.00445	0.207571	mtr-4	15.9822	38.3431	20.3599	29.1623
K07G5.3	I	7161016	7166518	0.820759	0.312227	1.39436	2.69	0.0045	0.207977	mks-6	0.285327	0.846223	0.605375	0.689059
C33D9.9	IV	8775041	8775274	18.2586	9.42035	0.954728	2.8	0.0045	0.207977	C33D9.9	7.6432	22.7691	9.68491	12.7718
Y67H2A.10 (1)	IV	13289417	13289499	16.7902	9.04094	0.893074	2.37	0.0045	0.207977		7.25282	20.8809	9.23963	11.493
F09E5.7	II	5352085	5353714	60.1456	33.9772	0.823894	2.31	0.00455	0.20901	F09E5.7	28.8113	60.459	34.9168	49.2897
C34C6.7	II	8707155	8708854	18.9333	9.63326	0.974827	2.34	0.0046	0.209397	C34C6.7	8.56875	30.5344	8.33533	11.4843
T02D1.7	IV	17406901	17407212	1.16645	0	33.33		0.0046	0.209397	T02D1.7	0	1.13603	0.565907	0.764619
B0213.17	V	3979044	3979134	260.745	127.471	1.03247	6.39	0.0046	0.209397	nlp-34	92.9555	53.3322	123.274	419.691
ZK6.10	V	414508	414760	407.56	223.519	0.866617	2.69	0.00465	0.209531	dod-19	200.331	415.487	278.691	367.08
D2063.1	V	4327130	4328826	100.819	54.4142	0.889715	2.82	0.00465	0.209531	D2063.1	44.9476	141.816	52.8886	58.8167
Y66D12A.9	III	11568135	11573343	115.878	65.2447	0.828678	2.32	0.0047	0.209531	Y66D12A.9	51.4844	105.798	69.0228	106.783
F11A10.1	IV	12079471	12084360	41.9507	23.3313	0.846424	2.32	0.0047	0.209531	lex-1	17.2171	47.562	20.6292	27.4978
C55B6.1	X	7200370	7204016	6.01586	2.96327	1.02158	2.36	0.0047	0.209531	C55B6.1	2.61983	6.20531	3.94352	6.04002
Y71F9B.4	I	2726656	2727545	251.736	131.417	0.937757	2.33	0.00475	0.210518	snr-7	101.156	238.997	130.082	219.38
C25E10.8	V	9053930	9054017	76.323	40.4499	0.915982	3.42	0.00475	0.210518	C25E10.8	32.2939	99.5044	37.1393	45.0116
F31D4.5	V	20854143	20858576	4.04348	1.87344	1.10991	2.39	0.0049	0.214648	F31D4.5	1.47765	2.99168	2.98258	4.48509
F20B6.3	X	4186672	4186746	5.41307	2.89113	0.90481	2.44	0.0049	0.214648	mrp-6	2.4167	6.7304	3.11875	4.0083
F54D11.2	V	4617947	4628510	20.8404	11.7189	0.830543	2.28	0.00495	0.215589	F54D11.2	9.04642	22.3915	11.188	15.0765
Y48G8AR.2	I	1282099	1285435	2.80097	1.12124	1.32083	2.42	0.00505	0.219312	Y48G8AR.2	1.38012	3.68427	1.24561	3.17984
C24G7.1	I	4109407	4112385	0.946823	0.212726	2.1541	3.34	0.0051	0.219591	C24G7.1	0.338064	2.05557	0.551579	0.398116
Y52B11A.9	I	11038743	11038827	27.4486	12.7073	1.11108	2.36	0.0051	0.219591	Y52B11A.9	10.5806	31.8042	13.7052	20.5964
W02A11.6	I	12754091	12755126	1.72368	0.447229	1.94641	3.4	0.0052	0.222628	W02A11.6	0.47757	4.45983	0.50851	1.95113
F22G12.1	I	13139132	13141894	1.54802	0.351151	2.14026	3.43	0.00525	0.222874	F22G12.1	0.266893	3.48408	0.397162	0.552867
F26F12.1	V	5836677	5836841	1.75867	0.456536	1.94569	2.57	0.00525	0.222874	col-140	0.346992	2.72757	0.541786	0.989195
F08A8.2	I	12942280	12946585	41.5229	23.41	0.826784	2.54	0.00535	0.225222	F08A8.2	26.2961	42.4247	46.727	58.9765
B0284.2	III	4381739	4384141	1.09071	0.229348	2.24965	3.49	0.00535	0.225222	B0284.2	0.158469	1.69604	0.162349	0.809128
C02B8.1	X	8147710	8148588	4.08445	1.44184	1.50223	2.45	0.00535	0.225222	C02B8.1	1.6625	8.8123	2.51249	4.12834
B0238.13	V	5247929	5248040	0.618015	0.163455	1.91875	2.71	0.0054	0.226067	B0238.13	0.246416	1.74032	0.192914	0.396208
R03A10.5	X	15446730	15450359	7.13851	3.51982	1.02012	2.32	0.00545	0.22753	R03A10.5	3.72273	6.73815	6.09181	9.86164
T28A11.16	V	3259057	3259215	41.0872	20.8301	0.980019	3.26	0.0055	0.228356	T28A11.16	17.6099	62.448	14.963	25.535
F59H6.3	II	2017796	2018860	9.52142	3.20288	1.57181	4.69	0.00555	0.229173	F59H6.3	7.49977	39.1297	12.9785	20.5881
T06G6.11	I	12708393	12708691	1.51844	0.302735	2.32646	3.74	0.0056	0.229357	T06G6.11	0.239059	1.70331	0.8022	1.28731
T20D4.7	V	3408870	3409519	12.3007	5.37386	1.19471	3.47	0.0056	0.229357	T20D4.7	4.02253	13.6231	6.93765	10.5318
Y54E5A.5	I	14707508	14707875	329.608	184.189	0.839565	3.24	0.00565	0.229539	Y54E5A.5	140.826	419.943	155.242	240.032
F28B12.3	II	5921965	5924839	23.74	13.3912	0.826032	2.26	0.00565	0.229539	vrk-1	10.2861	27.0695	13.3405	16.1895
T08A11.2	III	4269123	4269270	39.3346	22.0792	0.833111	2.44	0.00565	0.229539	T08A11.2	17.1225	37.8058	22.7231	31.9953
B0280.5	III	7103920	7103992	18.846	10.3769	0.860885	2.29	0.0057	0.230332	cpg-2	8.23224	21.7099	10.5668	15.8842
K07F5.13	IV	9858486	9862118	28.6084	15.9675	0.841302	2.31	0.0057	0.230332	npp-1	13.9759	0	16.1416	26.1254
Y39A3CL.6	III	1823975	1824114	19.5738	10.343	0.920263	2.27	0.00575	0.231116	pvf-1	9.8051	29.1243	12.1499	14.2034
C05E11.4	X	4571448	4573914	1.68814	0.678676	1.31464	2.36	0.0058	0.231893	amt-1	0.609617	1.10826	2.41895	1.1286
F43G9.12	I	8640509	8644399	25.4169	14.4063	0.819086	2.18	0.00585	0.23205	F43G9.12	11.866	31.0594	14.7807	20.8518
M03C11.8	III	10435861	10435983	25.1331	14.4789	0.795636	2.27	0.00585	0.23205	M03C11.8	11.4557	27.2453	14.4046	17.9337
F37B12.11	II	9038863	9039150	1.43103	0	33.33		0.006	0.236757	F37B12.11	0	2.12071	0	0.901936
C50F2.2	I	3881828	3888453	12.8105	6.5008	0.978638	2.39	0.00605	0.238108	C50F2.2	4.64586	12.9491	7.21672	8.41691
EGAP4.1	X	8727147	8727406	15.9171	7.24336	1.13584	3.39	0.0061	0.238832	EGAP4.1	5.2615	22.0279	6.59535	7.87953
F47A4.2	X	9822063	9822273	12.5546	7.15101	0.811994	2.34	0.00615	0.240168	dpy-22	5.38212	10.9512	9.36556	8.33005
F28H7.6	V	10756553	10756628	3.62516	1.6182	1.16365	2.6	0.00625	0.242196	irld-6	1.57851	6.60545	1.79229	2.0077
C25D7.3	V	15048106	15048209	6.98519	3.93787	0.826885	2.35	0.00625	0.242196	sdc-3	2.93811	6.3524	4.56928	4.97578
C31B8.4	V	2896637	2898417	3.24026	1.19445	1.43976	2.89	0.0063	0.242887	C31B8.4	1.30049	7.7229	1.22786	1.25936
ZK742.2	V	7803819	7803842	13.0666	6.9757	0.905471	2.61	0.0063	0.242888	ZK742.2	5.79672	14.677	9.64199	8.97956
R07B1.7	X	9868836	9869574	26.0586	12.2997	1.08314	3.8	0.0064	0.24549	R07B1.7	11.5805	20.1964	13.6847	35.6582
C26E6.4	III	4939565	4944404	62.5801	33.8034	0.820709	2.42	0.00645	0.246159	rpb-2	26.7149	67.2197	34.7684	44.0482
H27M09.1	I	6851372	6854136	19.1527	10.7476	0.83353	2.47	0.0065	0.24682	sacy-1	9.735	23.2348	13.3212	16.8876
Y116A8C.16	IV	16995777	17014946	9.24799	5.15331	0.843642	2.17	0.00665	0.250627	rom-4	4.23764	10.2655	5.59811	7.16911
E04F6.16	II	7200233	7200418	40.0761	6.71871	2.57649	19.4	0.0067	0.250636	mrpr-1	4.64234	49.2326	12.1019	23.3807
F07F6.5	II	5436756	5436933	22.9307	11.3519	1.01435	2.92	0.0068	0.253749	dct-5	10.103	0.836384	22.5496	39.1596
Y37E11AM.1	IV	3726131	3735496	14.3966	8.07208	0.834717	2.41	0.0069	0.256847	smgl-2	6.64374	16.7609	8.79961	11.0177
T12A7.1	IV	11745640	11748685	34.3317	19.7044	0.80102	2.21	0.00695	0.258072	gem-4	16.0989	36.852	14.9764	32.984
Y65B4BL.12	I	530395	530683	1.55413	0	33.33		0.00705	0.261144	Y65B4BL.12	0	3.06084	0	0.223818
F23B12.9	V	14432290	14432359	3.22955	0.544292	2.56888	4.55	0.0071	0.262277	egl-1	0.501443	7.11294	0.506966	0.96271
C26C6.6	I	7505972	7506646	0.657442	0	33.33		0.00715	0.262277	C26C6.6	0.10029	0.195209	0.687458	0.934381
Y55F3AM.3	IV	1012652	1019558	82.4575	46.1097	0.838582	2.27	0.00715	0.262277	Y55F3AM.3	35.8765	86.6937	46.4803	63.7718
Y80D3A.1	V	18859045	18859221	58.7457	33.8072	0.797151	2.51	0.0072	0.263471	wars-1	26.5035	58.1088	39.1273	43.3632
M03F8.3	V	5940024	5943363	70.9168	41.4606	0.774387	2.17	0.00725	0.26466	M03F8.3	31.598	71.5041	38.9412	54.2429
Y37F4.6	I	10873932	10875046	11.3823	6.27872	0.858253	2.19	0.00735	0.265451	Y37F4.6	4.99603	10.8336	6.85549	8.60683
T10D4.6	II	3119331	3123184	10.2848	5.82208	0.820905	2.17	0.00735	0.265451	T10D4.6	4.5297	10.2449	8.11696	6.87864
F45E10.1	II	11089386	11089456	19.6743	11.4458	0.781491	2.22	0.00735	0.265451	unc-53	9.2249	19.1832	12.1728	15.7989
T06E4.11	V	9616032	9617539	20.3367	10.9552	0.892463	2.58	0.00745	0.265451	pqn-63	7.70443	5.61135	16.3527	22.2655
F19B2.6	V	20158526	20161853	2.4955	1.20389	1.05163	2.42	0.00745	0.265451	F19B2.6	1.00007	2.96622	1.33942	1.87167
F33H12.4	II	2583237	2583346	3.31623	0.164296	4.33518	5.63	0.0075	0.265451	sri-74	0.15893	7.46001	0.212473	0.844612
T07A5.7	III	10311035	10311100	3.32155	0.161145	4.36543	5.83	0.0075	0.265451	T07A5.7	0.133613	5.32373	0.547118	2.37876
D1086.2	V	14098504	14098810	6.52742	2.87723	1.18183	2.23	0.0075	0.265451	D1086.2	2.58776	10.4361	3.81957	3.79693
Y73B3A.13	X	131022	132689	1.16058	0.324066	1.84048	3.05	0.00765	0.269498	Y73B3A.13	0.58218	2.00461	1.33599	0.994322
T01C3.4	V	14993909	14995201	12.5871	6.58142	0.93547	2.6	0.0077	0.27	fil-1	5.08825	15.4238	6.14986	8.19429
F52F10.3	V	1541524	1541824	16.4577	9.28184	0.826281	2.39	0.0078	0.272874	oac-31	7.25907	18.5515	7.73465	13.208
Y87G2A.6	I	13571449	13572063	44.8426	25.7711	0.799112	2.18	0.0081	0.281212	cyn-15	19.8355	48.0149	24.0233	34.3387
T20B6.3	III	2900377	2900402	29.442	16.1971	0.862142	2.76	0.0081	0.281212	T20B6.3	13.6672	18.5205	27.4893	33.8735
C14F5.2	X	7930738	7931808	15.8006	8.18453	0.949012	2.65	0.0081	0.281212	zig-3	6.44566	23.6931	5.67702	9.14841
C46E10.4	II	3717138	3719767	19.1582	10.7636	0.831797	2.48	0.00815	0.281212	fbxc-52	8.4555	20.9069	10.7996	14.5805
F53A2.9	III	13359120	13359277	11.9572	6.3587	0.911082	2.17	0.00815	0.281212	F53A2.9	5.53592	18.6689	6.54157	8.70196
D1086.1	V	14098847	14100477	4.63999	1.90755	1.2824	2.98	0.00815	0.281212	D1086.1	1.55063	5.9739	2.52687	3.18973
C44C8.6	IV	884909	890187	70.8714	41.6789	0.765888	2.14	0.0082	0.282293	mak-2	34.7489	82.2663	40.7425	59.1211
ZK616.1	IV	5402938	5405537	4.24651	1.84165	1.20528	2.26	0.00825	0.283369	ZK616.1	2.24694	3.95201	3.76805	4.10823
C29E4.4	III	7929049	7932994	26.3738	15.1919	0.795805	2.31	0.0083	0.28444	npp-15	12.1207	30.5649	14.0994	20.0646
M01H9.5	IV	4465256	4468487	2.13774	0.768287	1.47637	2.33	0.0084	0.284835	M01H9.5	0.813974	1.32063	1.89688	2.0284
Y51H4A.5	IV	16526031	16526132	5.42894	2.5009	1.11822	2.23	0.00845	0.284835	Y51H4A.5	1.94744	8.35923	2.59514	3.74536
T24A6.7	V	3525274	3526307	7.90079	3.57586	1.14371	2.91	0.00845	0.284835	T24A6.7	2.99732	11.7254	3.34559	5.59914
C34C6.11	II	8688171	8691915	0.415419	0.116091	1.83931	2.72	0.0085	0.284835	linc-120	0.088235	0.577234	0.103689	0.23236
T02H6.1	II	709381	723706	18.4294	10.7653	0.775618	2.12	0.00855	0.285245	T02H6.1	12.3089	19.8558	17.9631	19.4439
F45C12.8	II	1710259	1711417	1.46508	0.378446	1.95282	3.33	0.00865	0.287313	fbxa-184	0.26149	1.60551	1.0673	0.781418
T08G11.4	I	8905308	8905534	43.0875	25.0941	0.779919	2.16	0.00875	0.288731	T08G11.4	21.7575	48.2485	26.2801	41.0306
W08E12.2	IV	3305898	3306638	25.4103	12.5667	1.01581	3.44	0.00885	0.29013	W08E12.2	13.0245	8.79564	34.1265	36.4998
R02C2.7	V	242548	242616	17.1075	8.15798	1.06835	3.22	0.00885	0.29013	R02C2.7	6.55443	24.9969	7.33965	8.50878
C06E4.3	IV	7260885	7262028	3.78346	1.54737	1.28989	2.85	0.0089	0.291138	C06E4.3	1.31059	4.97932	1.36673	2.55421
T02B5.1	V	14166622	14166730	10.4199	5.70916	0.867997	2.4	0.00895	0.291882	T02B5.1	5.54029	5.07436	11.047	14.7653
H09F14.1	V	10615392	10615511	3.50455	1.51487	1.21004	2.2	0.009	0.291882	H09F14.1	1.16983	5.39384	1.72628	1.58833
F22B8.6	V	16100655	16102744	372.598	218.508	0.769933	2.14	0.009	0.291882	cth-1	182.885	349.418	283.427	322.988
F47E1.18	X	9069138	9073735	12.8228	7.48695	0.776264	2.13	0.0092	0.297093	linc-22	6.1728	14.7379	7.48565	10.3006
ZC482.1	III	12779640	12779726	3.81413	1.87837	1.02188	2.43	0.00935	0.300014	gab-1	1.90863	4.33055	2.29156	3.84076
K08C7.7	IV	10664421	10665686	9.45515	4.88326	0.953255	2.14	0.00935	0.300014	K08C7.7	4.49819	12.3972	5.06323	8.64455
F40F12.3	III	9920838	9920898	1.80527	0.600321	1.58841	2.93	0.0094	0.300343	F40F12.3	0.414796	3.14481	0.79544	1.20557
T08B2.2	I	6232777	6234280	1.57492	0.486457	1.69489	3.06	0.0095	0.30226	col-56	0.519459	1.50135	0.820123	1.38911
C56C10.15	II	6588779	6589129	0.787567	0	33.33		0.00955	0.303212	C56C10.15	0	0.90169	0.150462	0.61181
R09D1.12	II	9452073	9452263	1.0552	0.147045	2.84319	3.51	0.00965	0.304774	R09D1.12	0.121922	2.11967	0.333033	0.170854
Y61A9LA.10	V	4615760	4615817	45.5603	26.8048	0.765287	2.29	0.00965	0.304774	Y61A9LA.10	20.2019	38.9156	31.0584	34.1431
C33G8.2	V	7009761	7012244	4.9347	2.416	1.03034	2.52	0.0097	0.304774	C33G8.2	2.17612	4.53749	6.04965	3.4141
Y4C6B.2	IV	5340890	5344204	24.0706	14.0783	0.773802	2.08	0.00995	0.309412	Y4C6B.2	11.0525	19.3982	19.8555	20.4075
Y17G7B.22	II	12068097	12070675	2.36833	0.825286	1.52091	2.3	0.01	0.310329	Y17G7B.22	1.23568	2.97068	2.26206	2.70104

## Sheet: smg-1 mut 139 genes down
Gene ID	Chr	Start	End	smg-1(-) PRPs RNAi FPKM	control smg-1(-) gfp RNAi FPKM	Log2 fold change	Test statistic (Gene differential expression)	P-value (Gene differential expression)	Q-value (Gene differential expression)	Gene Description	smg1-gfpRNAi-L3 FPKM	smg1-prp8RNAi-L3 FPKM	smg1-prp31RNAi-L3 FPKM	smg1-prp6RNAi-L3 FPKM
F32A11.7	II	13144916	13145157	21.0706	50.203	-1.25254	-3.54	5e-05	0.00821359	mltn-1	40.4798	17.5215	18.8733	15.2445
E01G4.6	II	13482403	13485780	1.68617	8.23586	-2.28817	-5.51	5e-05	0.00821359	E01G4.6	5.91564	1.65385	0.858768	1.19864
K08D12.6	IV	1720790	1723069	22.3423	56.8156	-1.34651	-4.01	5e-05	0.00821359	K08D12.6	81.8835	14.1371	33.1775	43.95
F55G1.11	IV	7487567	7488010	13.3583	57.1395	-2.09675	-7.54	5e-05	0.00821359	his-60	39.6576	3.44396	13.5694	11.2629
F55G1.2	IV	7488217	7489142	4.1143	23.8741	-2.53673	-7.02	5e-05	0.00821359	his-59	16.5384	1.33127	3.99366	3.43382
F17E9.10	IV	8334298	8334765	8.14465	32.6968	-2.00523	-6.47	5e-05	0.00821359	his-32	22.7952	3.17183	10.2707	3.90848
ZK617.2	IV	12015475	12015659	22.7692	85.1936	-1.90366	-6.27	5e-05	0.00821359	lips-6	69.6931	18.1363	19.4112	20.7796
T23F6.2	IV	12721356	12722994	2.57169	9.65425	-1.90845	-4.85	5e-05	0.00821359	T23F6.2	8.4985	2.07185	3.37891	1.75348
F21F8.4	V	8269254	8272058	3.81797	13.4649	-1.81832	-4.09	5e-05	0.00821359	F21F8.4	12.1934	1.94692	6.27928	2.29309
F41E6.14	V	8634720	8634835	3.06515	9.16047	-1.57947	-4.12	5e-05	0.00821359	oac-29	7.97948	1.45209	3.99823	2.3944
D1086.3	V	14092863	14093986	18.0788	67.1083	-1.89219	-6.02	5e-05	0.00821359	D1086.3	58.0011	11.8471	28.3017	7.28974
T10C6.12	V	16040794	16041191	6.28168	39.71	-2.66028	-8.85	5e-05	0.00821359	his-3	33.4763	1.95743	8.33722	7.1406
Y102A11A.5	X	2031296	2031508	217.554	615.805	-1.5011	-3.97	5e-05	0.00821359	Y102A11A.5	501.521	206.538	171.77	170.004
F49H12.5	X	2074448	2075944	19.8137	60.1211	-1.60137	-4.92	5e-05	0.00821359	F49H12.5	53.8947	22.3485	27.8135	3.27011
K03A1.6	X	7309564	7309889	4.79911	35.3454	-2.88068	-10.6	5e-05	0.00821359	his-38	24.4221	2.67267	4.15024	3.33387
C10H11.6	I	4721178	4723960	37.9969	90.9573	-1.25931	-3.43	0.0001	0.0136153	ugt-26	86.2075	22.6031	56.3385	28.0779
F55G1.10	IV	7485748	7486217	5.74216	24.5356	-2.09521	-6.4	0.0001	0.0136153	his-61	17.0338	1.18166	5.38049	5.58834
Y37A1B.7	IV	14043657	14043780	37.1818	88.4814	-1.25078	-3.37	0.0001	0.0136153	Y37A1B.7	75.7054	42.2741	24.0948	33.2748
K03A1.1	X	7310110	7310580	4.4351	24.6876	-2.47675	-7.36	0.0001	0.0136153	his-40	21.564	1.49188	5.91799	4.53192
C54C8.2	I	12444587	12446502	0.829748	5.00814	-2.59353	-5.05	0.00015	0.0187351	C54C8.2	4.59081	0.090774	1.68645	0.733513
F18C5.5	II	6566628	6566705	23.0689	51.6083	-1.16165	-3.08	0.0002	0.023431	F18C5.5	41.6753	24.712	13.4909	18.8544
F54C9.4	II	8568932	8569088	3.69286	11.1443	-1.59349	-4.29	0.0002	0.023431	col-38	8.14938	2.9315	2.39505	2.9921
C14A4.9	II	10599330	10600529	55.6381	120.14	-1.11057	-4.24	0.0002	0.023431	C14A4.9	120.464	79.7855	35.3023	54.9306
T05G5.10	III	9746476	9747193	184.624	398.16	-1.10876	-3.08	0.0002	0.023431	iff-1	499.776	170.563	308.083	223.84
H04M03.4	IV	5885835	5889805	60.2416	124.664	-1.04921	-2.94	0.0003	0.0321553	glf-1	104.104	61.1812	36.6302	56.0126
F47B7.4	X	3766384	3766626	0.957943	6.03397	-2.65509	-5.76	0.0003	0.0321553	F47B7.4	6.14853	1.11555	0.685556	0.852622
Y67D8C.8	IV	3069736	3069847	99.6167	226.746	-1.18662	-5.18	0.00035	0.0359833	cpg-9	183.927	24.302	129.812	100.123
Y17D7B.7	V	18782491	18782605	8.82919	29.9336	-1.76141	-6.04	0.00035	0.0359833	Y17D7B.7	29.4883	3.98479	12.3918	12.6298
Y71F9B.9	I	2760948	2761040	11.6782	25.2869	-1.11457	-2.9	0.0004	0.0387513	Y71F9B.9	20.8927	7.45531	12.4325	12.1129
F49D11.6	I	10912051	10912203	1.26389	4.71129	-1.89825	-4.25	0.0004	0.0387513	F49D11.6	4.76011	1.17692	1.54092	1.54297
T10C6.11	V	16040091	16040516	3.05889	13.3995	-2.1311	-3.65	0.0004	0.0387513	his-4	12.0927	1.19622	3.56787	2.86693
Y65B4BR.8	I	534453	535347	8.92665	20.9146	-1.22832	-3.77	0.0005	0.045797	Y65B4BR.8	17.3924	7.06744	10.011	6.29396
Y49C4A.8	V	699518	699614	84.3111	172.701	-1.03449	-2.88	0.0005	0.045797	ugt-29	143.329	73.4915	79.7311	58.8577
C49G7.12	V	4038821	4039934	17.778	38.277	-1.10639	-3.55	0.0005	0.045797	C49G7.12	32.0992	12.7274	21.6294	11.8833
C45B11.2	V	11042817	11043855	10.1474	22.6378	-1.15762	-3.51	0.0005	0.045797	C45B11.2	18.5317	5.10776	12.2038	6.77021
F49C5.11	II	12555909	12557100	5.27369	14.8553	-1.49409	-3.15	0.00055	0.0491843	F49C5.11	20.6949	7.5166	9.6502	8.50401
Y43D4A.5	IV	16775847	16785057	0.214677	0.842528	-1.97256	-3.37	0.00055	0.0491843	Y43D4A.5	0.740491	0.168736	0.217556	0.164338
C47B2.8	I	12971614	12972259	113.643	237.13	-1.06118	-3.83	0.0006	0.05334	prx-11	170.07	32.8893	139.243	81.5483
C40H1.1	III	9322316	9324733	0.801656	2.54661	-1.66752	-3.55	0.00065	0.056134	cpb-1	1.92183	0.4303	0.907973	0.601438
T05H10.4	II	8053135	8054965	2.3294	5.72356	-1.29696	-2.91	0.0007	0.0597689	T05H10.4	4.38647	1.95522	1.66152	2.10038
M01E11.5	I	5572801	5572973	55.8045	107.846	-0.950521	-2.67	0.00075	0.0626229	cey-3	83.8288	31.1897	56.0443	42.9838
E03H4.8	I	12426734	12426766	32.2688	66.5193	-1.04363	-3.27	0.00075	0.0626229	E03H4.8	55.6091	20.9992	40.681	22.2452
Y47D7A.5	V	4414531	4414626	91.1985	188.005	-1.04369	-3.52	0.00075	0.0626229	grl-5	153.316	64.1839	44.3281	118.155
C17G1.6	X	9948991	9949060	19.1048	38.2786	-1.00261	-2.84	0.00085	0.0676108	nas-37	37.8374	23.9041	16.6623	18.2873
F55G1.3	IV	7486535	7487173	3.06915	9.74005	-1.66609	-4.39	0.0009	0.0690442	his-62	6.72995	1.57236	2.40068	2.57974
R03G5.5	X	7799626	7799780	8.67869	22.1636	-1.35264	-3	0.0009	0.0690442	gpx-7	18.6733	3.39023	13.5717	6.23479
R09E12.9	V	777571	778235	18.3687	42.2063	-1.20021	-4.31	0.001	0.0748168	R09E12.9	33.9448	10.1011	26.3232	12.3362
ZK228.4	V	18462804	18465320	30.1667	61.0226	-1.01639	-2.68	0.0011	0.0807005	ZK228.4	63.9138	24.1103	49.6036	20.3455
F32D1.11	V	4366355	4366462	41.4241	83.9326	-1.01876	-3.7	0.0012	0.0867732	F32D1.11	62.1693	43.3866	23.4287	25.9963
C35A5.5	V	10505850	10507943	1.19758	3.30223	-1.46332	-3.28	0.00125	0.0899583	C35A5.5	2.57661	0.611398	1.25564	0.915277
W03F11.5	I	2216100	2219442	2.04931	6.18049	-1.59258	-3.74	0.0013	0.0926741	W03F11.5	5.31361	2.52996	2.09093	0.623485
F58G1.5	II	12935092	12935357	17.8173	36.8034	-1.04657	-3.29	0.00135	0.0931623	lips-9	31.5185	12.6651	11.5649	25.5946
Y73B6BL.2	IV	6419507	6420901	4.46363	10.2269	-1.19607	-3.19	0.00135	0.0931623	htp-2	7.85146	2.22898	5.26185	3.17687
ZC434.3	I	10335545	10335739	31.8572	63.1681	-0.987575	-3.12	0.0014	0.0948652	ZC434.3	54.3028	29.0246	17.8877	34.7579
F35D2.1	II	7575922	7577615	4.49803	10.0088	-1.15391	-3.13	0.00145	0.0948652	F35D2.1	9.45221	5.22517	3.06402	4.77892
H23N18.5	V	4912242	4912383	226.006	453.035	-1.00326	-5.11	0.00145	0.0948652	H23N18.5	344.707	127.267	123.228	277.456
K07C5.5	V	10357328	10357903	31.9279	63.6783	-0.995986	-3.1	0.00145	0.0948652	ceeh-2	60.0112	18.2518	48.3874	28.8911
K08F4.3	IV	10129275	10130247	8.35853	17.9615	-1.10358	-3.32	0.0015	0.0977134	K08F4.3	14.0415	6.2851	9.02574	5.92698
Y38F1A.6	II	12996286	12996571	115.924	229.805	-0.987233	-2.67	0.00155	0.100107	Y38F1A.6	196.7	58.5312	148.32	88.1762
C35D10.13	III	4878172	4878310	15.9922	33.9675	-1.08679	-3.64	0.00165	0.105663	C35D10.13	26.3702	8.78521	18.7925	11.0156
Y54F10BM.11	III	2313994	2314073	3.22553	7.62863	-1.24189	-2.75	0.0017	0.10705	fbxa-66	6.16484	1.48794	3.64574	2.74993
C01F1.5	II	4281733	4281828	13.1941	27.0139	-1.03381	-3.25	0.00185	0.114586	C01F1.5	21.6211	12.8461	8.16876	10.3323
C35A5.3	V	10501243	10501397	5.87723	12.9935	-1.14458	-2.7	0.00195	0.119798	C35A5.3	12.9127	1.22741	9.65055	7.37207
F09F9.2	X	4111273	4111467	82.7009	155.042	-0.906688	-2.52	0.00195	0.119798	F09F9.2	141.784	98.5167	45.2386	74.4681
K06C4.10	V	8898195	8898645	1.20629	8.72701	-2.85491	-6.55	0.002	0.121879	his-18	14.0412	0.839974	3.01423	2.77367
T10C6.13	V	16041828	16042283	1.13224	8.08565	-2.83618	-6.41	0.00205	0.123433	his-2	6.09472	0.330231	1.06873	1.19002
Y62E10A.1	IV	13370224	13370293	376.833	696.442	-0.88608	-2.48	0.00215	0.128431	rla-2	744.638	291.278	363.824	456.537
F12F6.9	IV	11551797	11551960	41.9547	80.573	-0.941465	-2.56	0.00225	0.131291	col-128	61.5335	51.4195	23.0883	23.5234
R04B5.5	V	10087489	10089000	22.0455	42.7318	-0.954823	-3.03	0.00225	0.131291	R04B5.5	38.7145	18.685	28.8421	15.5303
ZK930.2	II	11893344	11893453	2.08663	5.61908	-1.42916	-3.42	0.00235	0.13504	ZK930.2	4.75339	1.63889	1.56391	2.5121
C54F6.9	V	7508994	7510602	1.3377	3.82716	-1.51652	-3.35	0.00255	0.142207	nhr-172	3.45164	0.957735	1.59299	0.833407
F57C2.3	II	14524173	14525111	3.69167	8.46958	-1.19802	-3.17	0.0026	0.143933	pot-2	7.40545	3.05047	3.70323	2.93232
K10D11.5	IV	12991717	12991804	18.7785	36.2318	-0.948179	-2.9	0.00265	0.145634	K10D11.5	30.2919	10.6192	22.4775	14.8084
Y53F4B.23	II	15124517	15126350	4.11517	10.3723	-1.33371	-3.37	0.0031	0.163241	Y53F4B.23	9.47335	1.73783	8.19205	2.30632
T12D8.5	III	13626464	13626531	163.917	300.442	-0.87412	-3.8	0.0032	0.166764	T12D8.5	231.493	112.492	146.636	127.12
Y54G2A.37	IV	2809474	2823519	5.71978	11.4879	-1.00609	-2.8	0.0033	0.170798	Y54G2A.37	11.8575	8.8449	5.25171	5.04971
F17E9.12	IV	8333672	8334005	2.6701	11.2243	-2.07166	-6.37	0.00335	0.171622	his-31	7.75549	1.8405	2.64084	1.1731
C05A9.1	X	10858647	10859293	21.5598	39.1948	-0.862315	-2.4	0.00335	0.171622	pgp-5	41.0818	19.2361	32.0921	18.4529
F09F7.4	III	5555404	5557318	114.091	203.221	-0.832864	-2.29	0.00385	0.188912	F09F7.4	171.297	63.1783	134.596	96.6085
F15E6.4	IV	4291462	4292109	5.20053	17.6419	-1.76227	-5.97	0.004	0.194379	F15E6.4	18.9619	1.14361	9.49326	7.88761
T07D3.9	II	900906	900930	6.44007	12.6568	-0.974763	-2.41	0.00405	0.194929	T07D3.9	11.2967	2.95414	9.47321	5.46238
F40A3.2	V	7878914	7881888	34.6824	64.2911	-0.890417	-3.02	0.00425	0.201349	F40A3.2	56.5245	34.3105	40.4145	20.75
T22D1.18	IV	6919941	6920059	2.67462	13.4296	-2.32801	-7.58	0.00435	0.203534	T22D1.18	9.92663	0.621793	3.59252	1.69139
R07E5.13	III	4413455	4414756	71.6149	133.576	-0.899334	-3.38	0.00455	0.20901	R07E5.13	119.759	47.3901	91.7285	56.5182
W03D8.11	I	2818766	2820815	4.33125	9.27623	-1.09876	-2.95	0.00465	0.209531	W03D8.11	8.22084	4.51572	3.65359	3.91071
C14F11.6	X	6238972	6239087	95.3876	169.594	-0.830208	-2.33	0.0047	0.209531	C14F11.6	169.108	137.467	81.4749	89.8721
C38C6.3	II	14633184	14634657	26.1743	47.6867	-0.865434	-2.74	0.0048	0.211494	C38C6.3	37.473	21.3164	11.0076	29.3752
T03G6.1	X	2608228	2609989	35.3572	63.6015	-0.847057	-2.76	0.0048	0.211494	T03G6.1	60.6039	43.0671	25.7459	36.2768
ZK550.6	IV	17262330	17262487	201.256	364.998	-0.858852	-2.31	0.00495	0.215589	ZK550.6	372.118	104.781	275.96	213.875
F19H8.4	II	14616129	14622589	17.9863	31.5252	-0.809607	-2.28	0.0051	0.219591	mltn-9	25.1945	19.003	13.9697	11.1143
W05B10.1	V	12660045	12660330	48.4083	88.4359	-0.869377	-3.3	0.0052	0.222628	his-74	75.6401	30.3093	53.5907	38.7405
C47D12.5	II	11685173	11685289	1.96853	4.69333	-1.25349	-2.95	0.00525	0.222874	C47D12.5	3.86652	1.7464	1.96452	1.41718
F41H10.10	IV	5391492	5391557	8.88796	16.6799	-0.908182	-2.66	0.0054	0.226067	htp-1	12.8938	5.06899	9.76736	5.68604
Y82E9BL.10	III	1324412	1324633	14.2704	26.2328	-0.878341	-2.65	0.0055	0.228356	fbxa-14	28.7485	9.70186	22.0336	14.4905
T21D12.2	IV	259051	259211	163.649	294.918	-0.84971	-2.29	0.00555	0.229173	dpy-9	272.773	253.819	120.47	102.003
R05A10.6	IV	14165789	14168487	1.05718	2.54009	-1.26465	-2.4	0.0056	0.229357	R05A10.6	2.3339	0.863775	1.31212	0.785446
F56D1.7	II	5456305	5458616	11.0777	20.1334	-0.861936	-2.55	0.00575	0.231116	daz-1	16.6563	6.96978	13.0378	8.69878
C09E8.3	II	546705	552026	125.116	222.083	-0.827832	-2.44	0.0058	0.231893	mlt-10	174.36	104.826	75.4673	120.205
C17F4.3	II	3240545	3241726	2.20789	5.42921	-1.29807	-3.06	0.00585	0.23205	C17F4.3	4.96502	1.91379	2.91279	1.09729
T13C5.9	X	6190255	6191211	4.18478	9.35701	-1.1609	-3.1	0.0059	0.233421	T13C5.9	8.86668	2.44519	5.25579	3.917
F11E6.4	IV	17470200	17470339	2.23195	6.36923	-1.51282	-2.48	0.0061	0.238832	F11E6.4	5.65617	1.83629	2.8754	2.5971
F59B10.5	II	10523039	10523192	42.9833	78.1064	-0.861665	-3.35	0.00625	0.242196	F59B10.5	60.2418	48.4134	26.537	25.4787
F32D8.12	V	10890854	10891030	99.5057	179.597	-0.851913	-2.25	0.0064	0.24549	F32D8.12	166.823	62.2554	125.446	83.8414
C14C6.4	V	539202	541486	1.01719	2.9122	-1.51752	-2.88	0.00645	0.246159	nhr-155	3.33203	0.191594	2.22803	0.519504
R166.1	II	10530409	10533506	5.61419	10.6715	-0.926612	-2.58	0.0065	0.24682	mab-10	8.88802	6.28205	4.57377	2.9458
F08H9.8	V	14476911	14478997	2.46741	5.33728	-1.11311	-2.71	0.00665	0.250627	clec-54	4.71595	1.25334	2.92859	2.76295
F34H10.4	X	9648532	9650911	0.397122	1.24451	-1.64793	-2.91	0.00665	0.250627	F34H10.4	1.12607	0.443247	0.335534	0.319679
F17C11.3	V	10949898	10951752	34.235	58.9219	-0.783331	-2.52	0.0067	0.250636	col-153	48.5249	35.7989	19.6816	31.5764
C06B3.7	V	13909748	13911524	53.1455	93.1993	-0.810372	-2.7	0.0067	0.250636	C06B3.7	73.6004	27.0474	62.0136	39.7636
Y75B8A.28	III	12319108	12323868	28.6594	50.4845	-0.816832	-2.6	0.00715	0.262277	Y75B8A.28	40.2989	15.4375	32.4918	23.6486
C23H3.2	II	61302	64311	73.2986	125.79	-0.779154	-2.21	0.0074	0.265451	C23H3.2	107.774	61.4607	75.1756	55.198
F47C10.2	V	3851693	3851799	25.9539	46.388	-0.837802	-2.7	0.0074	0.265451	btb-21	36.223	11.5369	32.4828	18.9116
T05G5.3	III	9747432	9748852	31.8663	54.5376	-0.775218	-2.19	0.00745	0.265451	cdk-1	46.4093	28.1426	29.3895	25.6071
F21C10.6	V	9124480	9124994	0	0.683649	-33.33		0.00745	0.265451	F21C10.6	0.472372	0	0	0
Y37H2A.12	V	18131060	18131109	2.02256	4.85872	-1.26439	-2.32	0.00745	0.265451	Y37H2A.12	4.34469	1.22976	2.6036	1.68305
F54D11.1	V	4628580	4635266	92.7501	162.357	-0.807747	-2.22	0.0076	0.268362	pmt-2	133.132	51.0744	117.069	62.0455
ZK377.1	X	3480251	3483661	11.9253	21.3321	-0.839003	-2.5	0.0077	0.27	wrt-6	18.1357	11.6885	7.45825	12.794
F11E6.6	IV	17465857	17465927	2.1235	5.01578	-1.24003	-2.94	0.00835	0.284835	F11E6.6	4.70343	2.14558	2.99917	1.37627
F26D2.2	V	16405763	16407704	5.71447	10.5697	-0.887238	-2.48	0.00835	0.284835	syp-1	8.52328	3.62066	6.22895	4.15004
F35G2.4	IV	12215909	12215989	49.0402	86.2526	-0.749172	-2.29	0.0084	0.284835	phy-2	0	54.691	0	0
T01B11.2	IV	8451637	8451771	45.5627	77.3329	-0.763228	-2.12	0.00845	0.284835	T01B11.2	63.46	28.4924	54.8417	31.8323
T03D3.1	V	2849352	2852031	0.927677	2.28576	-1.30098	-2.64	0.0085	0.284835	ugt-53	1.94383	0.461333	1.32184	0.45916
Y17D7B.3	V	18786672	18786788	1.36201	3.5751	-1.39224	-2.99	0.0085	0.284835	Y17D7B.3	3.14756	0.664722	2.08622	0.902349
T10C6.14	V	16042520	16042831	1.56966	8.27465	-2.39824	-6.25	0.00855	0.285245	his-1	5.71743	0.486869	2.07499	0.764619
C01G6.7	II	9292017	9294041	181.453	318.712	-0.812656	-2.39	0.0086	0.286281	acs-7	264.86	78.8611	231.568	176.361
Y46G5A.38	II	12827052	12827411	31.2321	59.4369	-0.928328	-4.05	0.0087	0.287709	Y46G5A.38	41.0683	11.6786	25.0079	29.3824
C07A9.11	III	9720123	9720291	3.76285	7.08258	-0.91245	-2.18	0.0087	0.287709	ncx-7	6.43505	1.87305	6.2435	2.03808
T20D4.13	V	3391683	3393294	1.66058	3.82533	-1.20389	-2.71	0.0088	0.289748	T20D4.13	5.68361	2.05968	4.21937	1.81684
R09F10.1	X	8323592	8325043	15.8239	28.4865	-0.848178	-2.54	0.009	0.291882	R09F10.1	22.6523	6.48408	21.3684	10.2047
R09B5.8	V	1448031	1448794	63.442	111.606	-0.814899	-3.59	0.0091	0.294493	cnc-3	107.824	84.949	49.0185	59.4423
K09H9.3	I	3137188	3138446	0.74447	2.14602	-1.52738	-2.94	0.00925	0.298071	col-49	1.51576	0.679758	0.653202	0.275685
F22F4.4	X	6001416	6001534	36.1001	69.1359	-0.937432	-2.24	0.0094	0.300343	F22F4.4	54.2151	18.2346	33.8922	33.3718
T10H9.5	V	6665664	6665815	9.25704	16.4568	-0.830064	-2.14	0.0095	0.30226	pmp-5	15.9274	3.68079	14.6184	11.054
Y55F3AM.7	IV	990241	990439	1.00286	2.97619	-1.56934	-3.26	0.0097	0.304774	egrh-2	3.08463	0.863825	1.76118	1.10496
F13H10.2	IV	11011952	11012022	27.387	46.4135	-0.761052	-2.12	0.0097	0.304774	ndx-9	41.4207	20.339	29.7172	26.3712
H41C03.1	II	5854422	5857066	26.3118	45.2557	-0.782388	-2.49	0.00975	0.305076	H41C03.1	41.0997	28.7253	29.0091	16.7383
F14E5.1	II	8417663	8419754	5.26953	10.0428	-0.93042	-2.5	0.00975	0.305076	F14E5.1	8.2841	1.64982	6.82444	4.49671
B0546.1	IV	3385638	3386907	540.963	921.294	-0.768131	-2.06	0.0098	0.306007	mai-2	746.853	296.813	449.203	528.075
F14F9.4	V	5132741	5137100	59.3851	99.9314	-0.750838	-2.07	0.00995	0.309412	F14F9.4	79.0421	34.4222	66.4712	39.9261

## Sheet: glp-1 adult 58 up 
Gene ID	Chr	Start	End	glp-4 PRPs RNAi FPKM	control glp-4 gfp-RNAi FPKM	Log2 fold change	Test statistic (Gene differential expression)	P-value (Gene differential expression)	Q-value (Gene differential expression)	Gene Description	glp4-gfpRNAi FPKM	glp4-prp8RNAi FPKM	glp4-prp31RNAi FPKM
Y74C9A.6	I	3747	3909	31.8908	0	33.33		5e-05	0.0494821	Y74C9A.6	0	37.935	1.68113
Y74C9A.1	I	43733	44677	0.569867	0	33.33		0.00055	0.262767	Y74C9A.1	0	0.532202	0.340279
Y71G12B.7	I	1792455	1792898	0.819201	0	33.33		0.0079	0.847287	Y71G12B.7	0	0.675126	0.424747
T28F2.8	I	3653958	3655329	3.68072	1.36438	1.43175	3.26	0.00225	0.571215	col-51	1.15202	3.11683	1.89739
F48C1.11	I	5334871	5334931	9.23008	3.02324	1.61024	4.29	0.00085	0.368023	F48C1.11	2.7602	4.9502	10.73
F17B5.1	I	13184912	13188297	6.75549	3.07677	1.13464	3.08	0.00135	0.456201	F17B5.1	2.83521	5.30275	5.28752
F31C3.11	I	15064301	15064453	85861.4	492.298	7.44633	189	5e-05	0.0494821	rrn-2.1	397.202	102770	3715.62
F12A10.7	II	5498124	5498256	12.7543	4.50991	1.49981	4.73	0.00355	0.663885	F12A10.7	4.01516	7.49729	12.659
F12A10.9	II	5498710	5499150	49.059	22.4146	1.13008	2.36	0.009	0.897648	F12A10.9	21.2067	34.576	44.3964
W07A12.6	II	9158108	9159874	4.16054	1.83062	1.18444	2.82	0.00445	0.663885	oac-54	1.61994	2.41286	4.6266
T10B9.3	II	9802542	9802721	135.137	59.4788	1.18398	4	5e-05	0.0494821	cyp-13A6	59.1786	128.996	94.166
C09G5.5	II	10707203	10708286	399.333	204.644	0.964474	3.22	0.0022	0.571215	col-80	188.556	414.626	185.719
F01D5.5	II	14001966	14002300	110.937	58.214	0.930302	3.73	0.0028	0.62571	F01D5.5	57.1326	115.31	57.7756
R05H10.1	II	14852430	14853627	29.2413	13.9923	1.06337	3.5	0.00105	0.408545	R05H10.1	12.6151	19.637	26.7192
Y48G9A.10	III	2082819	2088272	77.104	43.2452	0.834267	2.82	0.0023	0.571215	cpt-3	41.3412	59.686	67.3314
Y75B8A.3	III	12106340	12106535	50.0591	30.4564	0.716888	2.39	0.0099	0.925216	Y75B8A.3	28.455	34.2606	46.8156
C45G7.3	IV	2464471	2465440	95.4249	50.9821	0.904375	3.9	0.00385	0.663885	ilys-3	61.1531	99.711	96.3142
Y4C6B.6	IV	5350772	5350929	18.26	10.2994	0.826121	2.26	0.00795	0.847287	gba-4	11.373	20.4939	10.92
C17H12.6	IV	6822428	6822489	73.6659	41.8961	0.814182	2.97	0.00605	0.75788	C17H12.6	49.1975	85.0587	66.723
H20E11.2	IV	6827777	6829645	13.9843	6.83197	1.03343	3.01	0.0035	0.663885	H20E11.2	8.11129	13.0489	17.3446
C50F7.5	IV	7726718	7727951	198.277	82.3856	1.26705	4.58	5e-05	0.0494821	C50F7.5	121.446	307.876	183.204
F57H12.6	IV	7976234	7976369	95.9935	48.5278	0.984124	3.76	0.00045	0.22267	F57H12.6	41.8092	52.6688	98.5522
F57H12.3	IV	7977836	7979014	252.005	144.847	0.798919	3.1	0.00585	0.75788	ora-1	146.108	159.107	291.788
C24F3.6	IV	10216450	10217643	539.323	248.688	1.11681	3.16	0.00035	0.22042	col-124	227.508	482.734	316.041
F58B3.1	IV	11622897	11623124	95.3428	56.6468	0.751129	2.25	0.00905	0.897648	lys-4	60.3675	94.799	80.4129
ZK822.10	IV	11917137	11917355	1.13697	0	33.33		0.0032	0.663885	ZK822.10	0	0	1.28046
K08E7.9	IV	12599058	12599169	4.78552	2.16907	1.1416	2.91	0.00105	0.408545	pgp-1	2.07968	4.65027	2.98943
C32H11.12	IV	12941069	12941368	144.387	82.6931	0.804102	2.81	0.0064	0.75788	dod-24	74.1751	142.34	70.2172
F55G11.4	IV	12973636	12975597	283.023	100.444	1.49453	4.14	5e-05	0.0494821	F55G11.4	126.882	461.256	127.279
F49E11.6	IV	13051377	13052149	20.4424	8.43903	1.27641	4.02	0.00135	0.456201	scl-11	9.77512	17.3765	24.0668
Y67A10A.14	IV	14326948	14327121	7.32948	0	33.33		0.0099	0.925216	Y67A10A.14	0	9.02172	0
C14C6.5	V	536628	537418	202.551	77.3982	1.38792	5.78	5e-05	0.0494821	C14C6.5	74.1803	195.192	121.677
F22F7.5	V	2109283	2109387	23.4596	12.5371	0.903975	2.87	0.00455	0.663885	ckb-4	13.2846	17.6474	24.7548
C45H4.2	V	2179586	2181759	2.90259	1.09993	1.39994	3.11	0.00285	0.626774	cyp-33C1	1.23777	3.52527	2.70691
R08F11.3	V	3803240	3803454	110.587	65.2325	0.761513	2.66	0.0074	0.8313	cyp-33C8	61.5414	77.0147	112.203
K07C6.4	V	3939127	3941235	235.257	114.972	1.03295	3.17	0.0003	0.218763	cyp-35B1	112.956	186.501	218.433
K07C6.3	V	3942215	3944519	15.7153	6.14007	1.35584	3.96	0.0002	0.153944	cyp-35B2	5.7723	11.0698	14.6671
F39G3.1	V	4742427	4745378	74.7285	44.8591	0.736259	2.51	0.0086	0.897648	ugt-61	45.2566	71.1478	55.702
W02D7.11	V	8304411	8304469	22.8481	6.45346	1.82393	8.62	0.0028	0.62571	W02D7.11	5.55398	17.485	15.6567
W02D7.2	V	8307970	8310878	304.314	177.297	0.779388	2.75	0.00635	0.75788	clec-218	186.452	224.216	352.146
C25E10.2	V	9041330	9043677	7.36504	2.80135	1.39457	3.62	0.0007	0.312855	cyp-33B1	3.44858	5.85457	9.00267
R04B5.9	V	10098419	10098594	30.3176	16.9613	0.837908	2.47	0.0044	0.663885	ugt-47	16.3597	24.8132	22.1792
F32G8.3	V	10555173	10555238	8.4539	2.90255	1.5423	4.53	0.0063	0.75788	F32G8.3	3.16841	5.13095	11.185
H39E23.3	V	14107811	14110151	3.02	1.3019	1.21392	2.86	0.00455	0.663885	H39E23.3	27.1012	48.3756	65.5531
F14D7.10	V	14308485	14308841	1.65902	0	33.33		0.0019	0.560096	F14D7.10	13.4608	11.1692	12.5262
F08H9.5	V	14472535	14474372	1.74174	0.377751	2.20502	3.94	0.0037	0.663885	clec-227	0.426694	1.57377	1.08099
F22B8.5	V	16099325	16099534	40.1234	22.4772	0.835978	2.8	0.00455	0.663885	str-7	22.2812	37.6005	32.6632
F22B8.6	V	16100655	16102744	318.582	185.235	0.782305	2.37	0.00585	0.75788	cth-1	179.751	273.065	256.56
F44G3.2	V	16103894	16106140	386.83	214.444	0.851098	2.91	0.0037	0.663885	F44G3.2	196.37	297.791	330.564
F36D3.9	V	16534082	16534110	5.63182	1.56463	1.84777	4.19	0.00045	0.22267	cpr-2	1.33453	6.29214	1.39105
Y69H2.14	V	18638482	18639588	631.529	346.945	0.864142	2.47	0.00425	0.663885	Y69H2.14	307.306	560.159	371.253
ZK384.2	V	18734287	18734466	174.196	97.5364	0.836696	3.31	0.0045	0.663885	scl-20	95.5831	175.684	112.401
M162.2	V	19788680	19789343	269.927	116.838	1.20807	5.19	5e-05	0.0494821	clec-258	106.034	199.996	227.505
F20B6.9	X	4206305	4206444	1.2792	0	33.33		0.00145	0.467203	F20B6.9	0.31786	0.935651	0.814402
C45B2.8	X	6087966	6088363	17.3659	6.67236	1.37999	5.27	0.00475	0.671543	C45B2.8	10.7669	15.3039	20.0113
F48E3.2	X	7493020	7493120	27.1752	11.4236	1.25027	3.34	0.00015	0.129891	F48E3.2	12.0587	21.7359	26.0121
F46F2.3	X	15260024	15260290	443.282	218.579	1.02007	4.07	0.0011	0.408545	F46F2.3	212.592	493.058	242.033
K09E9.4	X	15630327	15630416	3.09259	0	33.33		0.0064	0.75788	K09E9.4	0.523151	3.62913	1.54796

## Sheet: glp-1 88 genes down
Gene ID	Chr	Start	End	glp-4 PRPs RNAi FPKM	control glp-4 gfp-RNAi FPKM	Log2 fold change	Test statistic (Gene differential expression)	P-value (Gene differential expression)	Q-value (Gene differential expression)	Gene Description	glp4-gfpRNAi FPKM	glp4-prp8RNAi FPKM	glp4-prp31RNAi FPKM
H31G24.4	I	4114734	4116369	6.24458	15.269	-1.28993	-3.13	0.00115	0.408545	cyb-2.2	17.7602	1.93329	11.2133
M01E11.5	I	5572801	5572973	30.5346	60.2282	-0.979996	-2.8	0.00185	0.557212	cey-3	55.1221	10.317	39.6048
F46F11.2	I	5619567	5620668	55.2397	121.675	-1.13926	-3.17	0.00035	0.22042	cey-2	106.565	10.6704	81.021
C32F10.6	I	5820999	5821108	0.699558	1.81332	-1.37412	-2.82	0.0063	0.75788	nhr-2	1.66937	0.310452	0.783954
T05E7.5	I	6202168	6202346	0.661167	1.92911	-1.54485	-2.93	0.0092	0.897648	vet-1	1.6075	0.12426	0.905618
F57B10.12	I	6565738	6565868	4.29194	10.0233	-1.22366	-3.13	0.0056	0.746038	mei-2	10.1278	1.25233	7.00984
H27M09.4	I	6843595	6845136	1.22063	4.46078	-1.86967	-4.21	0.0004	0.22168	dpy-14	3.91666	0.584574	1.28742
R06C7.1	I	7235384	7238794	10.7984	19.5495	-0.856323	-2.59	0.00695	0.809179	wago-1	18.5605	3.55423	15.4982
R06C7.4	I	7244937	7246295	23.5833	45.3744	-0.944114	-3.07	0.0036	0.663885	cpg-3	51.0602	8.50597	39.0988
D1081.7	I	8487620	8490938	3.84126	7.56849	-0.978427	-2.51	0.0047	0.671325	D1081.7	7.03896	1.29479	5.36431
C12C8.1	I	9322407	9322511	52.059	115.17	-1.14554	-3.34	0.00015	0.129891	hsp-70	98.589	51.6165	21.1399
T05F1.2	I	9622548	9624725	5.90475	12.7985	-1.11603	-3.08	0.00155	0.488074	T05F1.2	11.8988	1.51389	8.29005
T23D8.7	I	9989800	9994015	1.24053	2.73666	-1.14146	-2.52	0.00605	0.75788	hpo-24	2.40502	0.383242	1.60492
C25A1.8	I	10185296	10185468	48.0346	98.0175	-1.02897	-3.38	0.00225	0.571215	clec-87	94.2636	11.093	71.4428
C35E7.5	I	10823358	10828454	0.865582	2.79851	-1.69291	-3.4	0.0002	0.153944	C35E7.5	2.32644	0.320156	0.9722
C35E7.1	I	10846778	10850101	0.623669	1.95723	-1.64996	-3.22	0.00065	0.300192	vet-2	1.80665	0.234457	0.709805
T02G6.5	I	11815911	11819233	0.263863	1.13574	-2.10577	-2.66	0.0059	0.75788	T02G6.5	0.992527	0.177191	0.215025
ZK1053.4	I	13241664	13244730	0.438896	1.44328	-1.7174	-2.95	0.0038	0.663885	ZK1053.4	1.20927	0.087192	0.577488
F44F1.7	I	13269995	13272781	0.432284	1.27551	-1.56102	-2.96	0.0051	0.706605	vet-6	1.10442	0.122146	0.564377
M01E5.6	I	13299021	13300715	0.553026	1.63672	-1.56539	-3.06	0.00485	0.678755	sepa-1	1.41163	0.132976	0.777539
Y71A12B.11	I	13978430	13980148	0.226026	2.07101	-3.19577	-4.24	0.0095	0.911014	Y71A12B.11	1.74691	0.185075	0.118722
Y46B2A.1	II	868814	871700	0.338774	1.1384	-1.74861	-2.89	0.00995	0.925216	fbxc-51	1.10637	0.040653	0.501524
C08F1.10	II	1785858	1786277	0.30392	1.81289	-2.57653	-3.99	0.0088	0.897648	C08F1.10	1.50223	0.15414	0.411864
R52.1	II	2131080	2132475	0.209876	1.25827	-2.58383	-3.79	0.0091	0.897648	sdz-28	1.07493	0.116359	0.249206
Y27F2A.3	II	3177966	3180468	0.473144	1.44831	-1.61402	-2.48	0.00955	0.911014	sri-40	1.29155	0.239675	0.577387
F54D10.1	II	3824147	3824780	0.750658	3.51608	-2.22774	-4.14	0.00745	0.8313	skr-15	2.83688	0.064408	1.09569
W06B4.1	II	4471401	4473745	4.03283	8.69337	-1.10812	-2.9	0.00415	0.663885	W06B4.1	7.81341	1.30362	5.68884
EEED8.3	II	5414289	5415577	7.98266	16.1488	-1.01649	-2.87	0.00895	0.897648	EEED8.3	14.9644	2.09625	11.5529
EEED8.15	II	5419248	5421091	0.431803	1.64621	-1.93071	-3.02	0.0039	0.663885	EEED8.15	1.40954	0.158422	0.537508
ZK177.1	II	5528139	5529637	0.7505	2.09069	-1.47806	-2.87	0.00855	0.897648	ZK177.1	1.76351	0.174253	1.12055
K10B2.3	II	6365738	6366948	14.5696	29.1218	-0.999138	-2.59	0.00385	0.663885	clec-88	29.1416	4.31276	21.1479
T14B4.7	II	6712106	6712932	0.163971	0.860192	-2.39122	-2.91	0.00795	0.847287	dpy-10	0.845904	0.042166	0.273382
T07F8.3	II	7132643	7137217	2.69234	5.87361	-1.12538	-2.6	0.0045	0.663885	gld-3	7.05465	1.055	4.87339
F18A1.7	II	7663637	7663756	12.0734	26.7562	-1.14804	-2.84	0.0022	0.571215	F18A1.7	26.7647	3.57444	19.1378
T01H3.4	II	7880810	7882767	2.01006	6.03133	-1.58523	-3.3	0.0011	0.408545	perm-1	5.42473	0.388136	3.02107
T05H10.4	II	8053135	8054965	2.70096	5.55537	-1.04041	-2.36	0.00635	0.75788	T05H10.4	4.96331	1.25608	3.05583
F54C9.8	II	8575541	8577722	11.1787	22.7553	-1.02545	-2.94	0.00235	0.571215	puf-5	20.9969	2.10945	17.4861
AH6.5	II	9524172	9526366	6.61833	13.4973	-1.02814	-2.6	0.00405	0.663885	mex-6	12.365	1.64468	9.51551
C05C10.5	II	9939154	9940337	6.76733	14.4931	-1.09871	-2.57	0.0044	0.663885	C05C10.5	12.7033	1.98155	9.13623
K10H10.3	II	14498026	14499686	2.12333	4.84628	-1.19055	-2.89	0.00605	0.75788	dhs-8	5.34906	2.19438	1.63138
T24C4.2	III	869512	869860	0.673565	1.90292	-1.49833	-2.99	0.00725	0.8313	T24C4.2	1.78658	0.326314	0.670007
C03C10.3	III	4094835	4094925	22.5999	41.3249	-0.870693	-2.53	0.004	0.663885	rnr-2	37.6486	9.68829	27.9194
C16C10.3	III	4176045	4176161	7.31166	12.9328	-0.822762	-2.3	0.0092	0.897648	hrde-1	11.9998	2.39588	9.99351
B0244.8	III	5728178	5730394	13.5526	32.3946	-1.25719	-3.71	0.00045	0.22267	egg-1	28.779	2.57215	19.9153
B0280.5	III	7103920	7103992	43.62	84.2675	-0.949986	-2.71	0.00195	0.562859	cpg-2	83.2785	12.0972	67.1931
F44E2.2	III	8853803	8861102	5.90965	13.8198	-1.22559	-3.19	0.0004	0.22168	retr-1	11.8441	1.83321	7.57968
F43D9.4	III	10506430	10506801	61.7466	111.252	-0.849395	-2.77	0.0062	0.75788	sip-1	111.192	18.5046	97.172
Y39E4B.5	III	13169918	13173106	1.89424	4.49891	-1.24796	-2.9	0.00535	0.719653	Y39E4B.5	4.15417	0.569421	2.67549
T05D4.2	III	13562936	13563054	0.429651	1.49089	-1.79494	-3.2	0.0079	0.847287	T05D4.2	1.2029	0.150252	0.514773
W09G12.1	IV	1204591	1204970	0.394419	2.08646	-2.40325	-4.09	0.00325	0.663885	dsl-2	1.75505	0.139626	0.522697
F30B5.1	IV	4235614	4236706	0.254222	1.72877	-2.76559	-4.08	0.0075	0.8313	dpy-13	1.65871	0.257202	0.157142
E04A4.1	IV	4737558	4738734	0	0.545366	-33.33		5e-05	0.0494821	fbxb-78	0.476687	0	0
T11F8.3	IV	5469995	5473175	9.34016	17.7866	-0.929273	-2.52	0.00525	0.713125	rme-2	15.9651	1.94771	13.9396
Y73B6BL.38	IV	6421592	6423500	10.3084	23.6859	-1.20021	-3.53	0.0004	0.22168	puf-11	20.7543	2.46812	13.6965
F55G1.8	IV	7472901	7473340	6.87476	13.4917	-0.972691	-2.66	0.00275	0.62571	plk-3	12.5225	3.17394	8.67395
C09G9.6	IV	8888973	8890856	7.48881	15.2296	-1.02407	-2.58	0.00455	0.663885	oma-1	13.7333	1.79317	11.2394
F27C8.6	IV	9588589	9588834	13.6294	26.6899	-0.969565	-2.6	0.0039	0.663885	trcs-1	24.5942	3.69158	19.6262
C28D4.3	IV	9740515	9740901	15.8561	30.3862	-0.938379	-2.57	0.00345	0.663885	gln-6	28.8852	5.01099	22.8408
C08F8.3	IV	11155029	11156695	2.2821	5.72091	-1.32588	-3.2	0.00175	0.538806	C08F8.3	5.36941	0.940327	3.17218
C29F4.1	IV	11225505	11226519	0.456565	2.50526	-2.45607	-4.56	0.00275	0.62571	col-125	2.53657	0.347709	0.495499
F22B3.4	IV	11410485	11413001	9.58684	28.1609	-1.55457	-4.48	5e-05	0.0494821	F22B3.4	25.3621	1.94194	14.0463
F58B3.9	IV	11640794	11641015	4.38108	15.6012	-1.8323	-4.93	5e-05	0.0494821	ttr-50	13.395	1.25073	5.63529
T12G3.6	IV	12030626	12031271	4.19577	10.5493	-1.33014	-2.75	0.0027	0.62571	T12G3.6	10.0729	1.52315	6.83723
Y45F10C.3	IV	13666823	13666911	6.41334	13.828	-1.10844	-3.04	0.00295	0.638629	fbxa-215	12.4165	1.57743	9.05224
F52B11.4	IV	14099272	14099352	0.376167	1.51697	-2.01174	-3.45	0.0096	0.911014	col-133	1.22394	0.307886	0.287938
Y105C5B.13	IV	15946790	15947439	1.29997	3.95329	-1.60458	-3.42	0.009	0.897648	skr-10	3.18964	0.249084	1.72215
C52D10.7	IV	17163554	17164210	0.690647	2.88373	-2.06192	-3.88	0.0073	0.8313	skr-9	3.52147	0.18414	1.37131
C52D10.9	IV	17165189	17165853	0.974449	3.68107	-1.91747	-3.95	0.0046	0.663885	skr-8	3.52688	0.301961	1.41378
F26D10.10	IV	17273294	17273652	9.31122	17.5529	-0.914669	-2.69	0.00935	0.905904	gln-5	16.13	3.37465	13.4489
F16B4.8	V	1577690	1584934	1.23508	3.03239	-1.29585	-2.78	0.00875	0.897648	cdc-25.2	2.74954	0.408458	1.63021
Y46H3A.3	V	1804799	1804971	64.6991	136.005	-1.07184	-4.33	0.00115	0.408545	hsp-16.2	120.895	62.0081	34.1246
Y46H3A.2	V	1805233	1805875	59.0762	152.8	-1.37099	-5.54	5e-05	0.0494821	hsp-16.41	149.922	62.9766	33.9249
Y47D7A.1	V	4422406	4423065	4.40065	10.8451	-1.30126	-3.33	0.0079	0.847287	skr-7	8.75019	0.732069	5.97148
ZC404.8	V	6784853	6784922	20.5075	47.0855	-1.19913	-3.33	0.00035	0.22042	spn-4	41.1048	5.19181	28.7517
F52E1.1	V	8414085	8415255	32.8797	69.827	-1.08659	-3.5	0.0014	0.461833	pos-1	59.4487	6.15554	45.8482
T21C9.13	V	10597316	10598665	3.44682	7.82216	-1.1823	-2.91	0.00735	0.8313	T21C9.13	7.55562	0.894844	5.9043
C50B6.2	V	13311848	13312266	26.2654	50.5724	-0.945186	-2.7	0.00215	0.571215	nasp-2	44.6418	6.82124	36.1537
T22G5.7	V	13889869	13890319	312.615	570.145	-0.866941	-4.3	0.0046	0.663885	spp-12	528.813	112.889	432.216
T01C3.3	V	14992138	14992677	10.2725	21.9052	-1.09249	-3.22	0.0043	0.663885	T01C3.3	18.6292	2.32863	14.0172
T25E12.5	V	16746127	16746262	13.7633	26.9304	-0.968414	-2.51	0.00525	0.713125	gyg-2	23.1999	3.84244	18.1576
F53H2.2	V	20394073	20394732	374.342	751.938	-1.00626	-6.88	0.00205	0.571215	cnc-7	624.244	524.038	500.623
F53F8.3	V	20689035	20689529	2.03238	6.47742	-1.67225	-2.96	0.0066	0.774941	F53F8.3	5.53904	0.392107	2.88408
R09F10.8	X	8326128	8326452	2.9595	7.015	-1.24509	-2.58	0.00455	0.663885	R09F10.8	6.2603	0.723728	4.29146
F08G12.10	X	11296202	11296731	1.35472	4.27113	-1.65663	-3.64	0.00105	0.408545	inx-2	3.98527	0.433773	1.90935
T25C12.2	X	11487788	11488178	281.754	708.54	-1.33042	-7.2	5e-05	0.0494821	spp-9	645.749	70.863	406.679
C04B4.2	X	12283301	12285314	1.14472	3.24522	-1.50332	-3.16	0.0036	0.663885	C04B4.2	2.91974	0.238419	1.79109
R04D3.3	X	13290300	13290628	2.55105	6.82915	-1.42061	-3.39	0.00235	0.571215	R04D3.3	6.2158	0.66518	3.8281
K02B9.1	X	13929475	13929631	2.68893	6.21225	-1.20808	-3.02	0.0034	0.663885	meg-1	5.58788	0.710611	3.96355
