# Supplementary material
Source: HighWire-hosted journal article supplement (doi:10.1101/rna.053397.115)
Supplement: Table_S3.xlsx [file Table_S3.xlsx]

## Sheet: AS events in N2
Transcript ID	Gene ID	Chr	PRPs RNAi L3 N2 FPKM	Control GFP RNAi L3 N2 FPKM	Log2 fold change	Test statistic (Transcript differential expression)	P-value (Transcript differential expression)	Gene Description	gfp RNAi L3 FPKM	prp-6 RNAi L3 FPKM	prp-8 RNAi L3 FPKM	prp-31 RNAi L3 FPKM
M01E5.5a	M01E5.5	I	7.34943	8.62952	-0.231647	0.361	0.718232	top-1	6.0957	5.21276	4.27444	5.65411
M01E5.5b	M01E5.5	I	51.0489	45.7363	0.158539	-0.284	0.776351	top-1	32.3072	36.3558	39.3124	31.748
F13C5.6a	F13C5.6	X	30.1923	28.1872	0.0991416	-0.169	0.866113	unc-96	19.9108	18.3358	23.3139	21.0993
F13C5.6b	F13C5.6	X	10.4076	14.4108	-0.469519	0.722	0.470453	unc-96	10.1795	7.69156	5.90657	7.94886
C06A5.7a	C06A5.7	I	34.6159	30.3879	0.187939	-0.328	0.74295	unc-94	21.4653	20.6208	28.6403	22.4323
C06A5.7b	C06A5.7	I	27.6605	32.2403	-0.221035	0.379	0.705029	unc-94	22.7738	18.424	21.5144	17.8593
C02C6.1a	C02C6.1	X	9.74724	5.63342	0.790984	-1.22	0.223204	dyn-1	3.97932	5.08717	8.46862	6.51076
C02C6.1b	C02C6.1	X	33.8595	32.7778	0.0468417	-0.0835	0.933482	dyn-1	23.1535	22.3274	28.5761	20.1636
F29B9.2a	F29B9.2	IV	8.5635	10.9847	-0.359225	0.588	0.556267	jmjd-1.2	7.75937	6.80036	5.33222	6.08677
F29B9.2b	F29B9.2	IV	15.4767	13.5067	0.196424	-0.336	0.73687	jmjd-1.2	9.54084	7.84033	13.6737	10.1654
F54C1.3a	F54C1.3	I	19.6581	21.1933	-0.108485	0.19	0.849569	mes-3	14.6968	13.1819	13.6749	13.4622
F54C1.3b	F54C1.3	I	0	0	0	0	1	mes-3	0.296406	0.275873	0.225406	0.230811
Y42G9A.3a	Y42G9A.3	III	40.7117	26.5578	0.616311	-1.02	0.310005	Y42G9A.3	18.7379	40.4582	26.8575	21.4302
Y42G9A.3b	Y42G9A.3	III	11.1702	3.13606	1.83263	-2.37	0.0176782	Y42G9A.3	2.23656	9.10003	10.4234	4.62533
F38B7.1a	F38B7.1	V	40.527	33.261	0.285053	-0.479	0.631617	ccch-1	23.4948	38.7471	6.29712	37.941
F38B7.1b	F38B7.1	V	49.484	37.2575	0.409432	-0.698	0.484887	ccch-1	26.3178	24.7209	40.9103	36.5229

## Sheet: As events in smg-1
Transcript ID	Gene ID	Chr	PRPs RNAi smg-1 mut L3 FPKM	Control gfp RNAi smg-1 mut L3 FPKM	Log2 fold change	Test statistic (Transcript differential expression)	P-value (Transcript differential expression)	Gene Description	smg-1 mutant gfp RNAi-L3 FPKM	smg-1 mutant prp-6 RNAi-L3 FPKM	smg-1 mutant prp-8 RNAi-L3 FPKM	smg-1 mutant prp-31 RNAi-L3 FPKM
M01E5.5a	M01E5.5	I	6.2809	6.1569	0.028767	-0.0599	0.952256	top-1	4.30775	3.75433	3.86915	5.31466
M01E5.5b	M01E5.5	I	43.9344	38.2519	0.199819	-0.489	0.625126	top-1	26.7634	25.4199	32.3506	28.1253
F13C5.6a	F13C5.6	X	29.1221	26.831	0.118212	-0.28	0.779231	unc-96	18.7726	18.8008	19.7545	19.6158
F13C5.6b	F13C5.6	X	9.5803	9.78587	-0.0306292	0.0635	0.94937	unc-96	6.8468	7.24334	5.97026	6.57987
C06A5.7b	C06A5.7	I	29.4822	26.9694	0.128523	-0.306	0.759686	unc-94	18.8694	20.5309	19.6008	18.6623
C06A5.7a	C06A5.7	I	45.8324	38.7166	0.243414	-0.594	0.552782	unc-94	27.0885	26.9068	34.1491	28.181
C02C6.1b	C02C6.1	X	38.5056	30.6825	0.327654	-0.808	0.419039	dyn-1	21.4673	24.6394	27.1214	24.2109
C02C6.1a	C02C6.1	X	7.02807	5.15919	0.445982	-0.937	0.348962	dyn-1	3.60969	4.44015	5.13044	4.44433
F29B9.2b	F29B9.2	IV	17.574	8.94326	0.97457	-2.24	0.0248019	jmjd-1.2	6.25726	9.31997	14.1521	9.82605
F29B9.2a	F29B9.2	IV	7.92878	8.08774	-0.0286378	0.0629	0.949862	jmjd-1.2	5.65868	5.22059	5.10119	5.94066
F54C1.3a	F54C1.3	I	20.0534	21.2435	-0.0831738	0.193	0.847349	mes-3	14.7186	12.5181	13.6103	13.2392
F54C1.3b	F54C1.3	I	0	0	0	0	1	mes-3	0.15675	0.168638	0.259844	0.206829
Y42G9A.3a	Y42G9A.3	III	36.9147	29.7787	0.309918	-0.672	0.501765	Y42G9A.3	20.8459	21.7814	28.7007	20.3669
Y42G9A.3b	Y42G9A.3	III	12.1336	5.29025	1.1976	-2.15	0.031209	Y42G9A.3	3.69079	6.01443	11.5133	4.63418
F38B7.1a	F38B7.1	V	34.6958	26.6363	0.381369	-0.925	0.354875	ccch-1	18.6364	36.2429	11.0042	31.5749
F38B7.1b	F38B7.1	V	50.6025	36.0183	0.49048	-1.22	0.224129	ccch-1	25.2006	36.8014	32.545	33.6976
